# Supplementary material
Source: HighWire-hosted journal article supplement (doi:10.1101/rna.079758.123)
Supplement: Supplemental_Table_S1.xlsx [file Supplemental_Table_S1.xlsx]

## Sheet: 0.5 mM BS3 Elite
0.5 mM DSS cross-links low-resolution MS/MS OT Elite
Inter-subunit cross-links
Id	Protein1	Protein2	XLType	Spectrum	AbsPos1	AbsPos2	deltaAA	Mr	Mz	z	Error_rel[ppm]	TIC	deltaS	ld-Score
LPVYMKHSNAMK-LIHKYK-a6-b4	sp|P17629|HPR1_YEAST	sp|P53552|THO2_YEAST	inter-protein xl	aleitner_C1509_098.c.04257.04257.5_aleitner_C1509_098.c.04214.04214.5	340	488		2356.27	472.261	5	-5.2	0.73	0	35.35
TKVHYSEVDTPFNK-YDKYQTR-a2-b3	sp|P33441|MFT1_YEAST	sp|O13539|THP2_YEAST	inter-protein xl	aleitner_C1509_094.c.06485.06485.4_aleitner_C1509_094.c.06443.06443.4	14	72		2774.34	694.593	4	-5.2	0.43	0	34.76
IYDDFSKGPK-YSLKER-a7-b4	sp|P33441|MFT1_YEAST	sp|O13539|THP2_YEAST	inter-protein xl	aleitner_C1509_094.c.07378.07378.4_aleitner_C1509_094.c.07326.07326.4	197	197		2101.06	526.273	4	-5.5	0.68	0	34.1
GPKELESINASMK-AKFGLENK-a3-b2	sp|P33441|MFT1_YEAST	sp|O13539|THP2_YEAST	inter-protein xl	aleitner_C1509_098.c.07739.07739.3_aleitner_C1509_098.c.07734.07734.3	200	187		2446.28	816.433	3	-0.6	0.49	0.17	33.5
FLIEKNYLK-YSLKER-a5-b4	sp|P33441|MFT1_YEAST	sp|O13539|THP2_YEAST	inter-protein xl	aleitner_C1509_094.c.10675.10675.4_aleitner_C1509_094.c.10649.10649.4	170	197		2099.16	525.798	4	-3.6	0.56	0.69	33.23
GPKELESINASMK-FGLENKYSLK-a3-b6	sp|P33441|MFT1_YEAST	sp|O13539|THP2_YEAST	inter-protein xl	aleitner_C1509_098.c.09355.09355.4_aleitner_C1509_098.c.09301.09301.4	200	193		2738.41	685.61	4	-4.2	0.4	0	33.11
AEWEKELGTDLVK-AKFGLENK-a5-b2	sp|P33441|MFT1_YEAST	sp|O13539|THP2_YEAST	inter-protein xl	aleitner_C1509_098.c.10016.10016.3_aleitner_C1509_098.c.09984.09984.3	157	187		2560.33	854.452	3	-4.4	0.44	0.39	32.14
NYLKLVDPGLK-FGLENKYSLK-a4-b6	sp|P33441|MFT1_YEAST	sp|O13539|THP2_YEAST	inter-protein xl	aleitner_C1509_099.c.11331.11331.4_aleitner_C1509_099.c.11317.11317.4	174	193		2594.43	649.615	4	-2.3	0.49	0.58	32.12
GVDAQIKNYLDQIK-LVDPGLKK-a7-b7	sp|O13539|THP2_YEAST	sp|P33441|MFT1_YEAST	inter-protein xl	aleitner_C1509_094.c.14092.14092.4_aleitner_C1509_094.c.14050.14050.4	175	181		2610.45	653.62	4	-5.3	0.46	0.46	32.05
DKISEETNADIESKGK-TSKNTDR-a14-b3	sp|P53552|THO2_YEAST	sp|P53851|TEX1_YEAST	inter-protein xl	aleitner_C1509_099.c.03253.03253.4_aleitner_C1509_099.c.03227.03227.4	390	405		2721.31	681.336	4	-6.9	0.36	0	31.07
SDIENVRQEVSSYKEK-YINLLKR-a14-b6	sp|P33441|MFT1_YEAST	sp|O13539|THP2_YEAST	inter-protein xl	aleitner_C1509_098.c.09183.09183.5_aleitner_C1509_098.c.09169.09169.5	224	122		2966.55	594.319	5	-5.5	0.41	0.62	30.44
NYLKLVDPGLKK-FGLENKYSLK-a4-b6	sp|P33441|MFT1_YEAST	sp|O13539|THP2_YEAST	inter-protein xl	aleitner_C1509_098.c.09797.09797.5_aleitner_C1509_098.c.09807.09807.5	174	193		2722.51	545.51	5	-7.1	0.61	0.57	30.4
GPKELESINASMK-NYLDQIKMAR-a3-b7	sp|P33441|MFT1_YEAST	sp|O13539|THP2_YEAST	inter-protein xl	aleitner_C1509_094.c.12077.12077.4_aleitner_C1509_094.c.12024.12024.4	200	182		2791.41	698.86	4	-5.5	0.48	0	30.37
EAQLLEDTKTGR-FLDLQSSIDTKK-a9-b11	sp|O13539|THP2_YEAST	sp|P33441|MFT1_YEAST	inter-protein xl	aleitner_C1509_098.c.09280.09280.4_aleitner_C1509_098.c.09257.09257.4	85	82		2891.49	723.882	4	-6	0.42	0	30.07
ISSETSGGEAKDEIIR-ANTQNSHYKILSTR-a11-b9	sp|P17629|HPR1_YEAST	sp|P53552|THO2_YEAST	inter-protein xl	aleitner_C1509_094.c.07443.07443.4_aleitner_C1509_094.c.07379.07379.4	573	853		3460.73	866.191	4	-2.6	0.3	0.54	29.82
TKVHYSEVDTPFNK-HLLKK-a2-b4	sp|P33441|MFT1_YEAST	sp|P53552|THO2_YEAST	inter-protein xl	aleitner_C1509_093.c.05802.05802.4_aleitner_C1509_093.c.05743.05743.4	14	163		2439.31	610.834	4	-4.3	0.27	0	29.56
GVDAQIKNYLDQIK-KDSSEER-a7-b1	sp|O13539|THP2_YEAST	sp|P33441|MFT1_YEAST	inter-protein xl	aleitner_C1509_098.c.09708.09708.4_aleitner_C1509_098.c.09653.09653.4	175	182		2591.29	648.83	4	-7.7	0.38	0	29.16
GPKELESINASMK-YSLKER-a3-b4	sp|P33441|MFT1_YEAST	sp|O13539|THP2_YEAST	inter-protein xl	aleitner_C1509_099.c.06783.06783.4_aleitner_C1509_099.c.06739.06739.4	200	197		2335.2	584.807	4	-5.2	0.33	0	28.15
GPKELESINASMK-IDNGILAHKPR-a3-b9	sp|P33441|MFT1_YEAST	sp|P53552|THO2_YEAST	inter-protein xl	aleitner_C1509_099.c.07506.07506.5_aleitner_C1509_099.c.07736.07736.5	200	482		2773.47	555.703	5	-2.2	0.52	0.58	28.11
FGLENKYSLK-IYDDFSKGPK-a6-b7	sp|O13539|THP2_YEAST	sp|P33441|MFT1_YEAST	inter-protein xl	aleitner_C1509_099.c.09142.09142.4_aleitner_C1509_099.c.09129.09129.4	193	197		2504.27	627.076	4	-4.3	0.66	0	28.11
ITSIFKEELLK-KMIQK-a6-b1	sp|P33441|MFT1_YEAST	sp|O13539|THP2_YEAST	inter-protein xl	aleitner_C1509_098.c.08887.08887.3_aleitner_C1509_098.c.08846.08846.3	242	231		2104.21	702.41	3	-7.6	0.5	0	27.99
AKFGLENKYSLK-NYLKLVDPGLKK-a8-b4	sp|O13539|THP2_YEAST	sp|P33441|MFT1_YEAST	inter-protein xl	aleitner_C1509_099.c.08843.08843.5_aleitner_C1509_099.c.08834.08834.5	193	174		2921.65	585.338	5	-4.9	0.47	0.75	27.83
DVAAGVQNPKSISEYYSTFEHLNR-LENLKDKLPDIK-a10-b5	sp|O13539|THP2_YEAST	sp|P33441|MFT1_YEAST	inter-protein xl	aleitner_C1509_093.c.14585.14585.4_aleitner_C1509_093.c.14541.14541.4	98	104		4287.2	1072.81	4	-1.2	0.29	0.49	27.33
WVPSEKLQGILEQYCAPDTDIR-GPKELESINASMK-a6-b3	sp|O13539|THP2_YEAST	sp|P33441|MFT1_YEAST	inter-protein xl	aleitner_C1509_094.c.17441.17441.4_aleitner_C1509_094.c.17266.17266.4	152	200		4158.06	1040.52	4	-0.6	0.32	0	27.08
INSASQTEGDELKSEQTQPK-KVSAKTSNEEAAGK-a13-b5	sp|P17629|HPR1_YEAST	sp|P04147|PABP_YEAST	inter-protein xl	aleitner_C1509_096.c.02391.02391.4_aleitner_C1509_096.c.02388.02388.4	683	520		3745.85	937.471	4	0.5	0.47	0.62	26.93
INSASQTEGDELKSEQTQPK-KQLELNK-a13-b1	sp|P17629|HPR1_YEAST	sp|P53552|THO2_YEAST	inter-protein xl	aleitner_C1509_099.c.05203.05203.4_aleitner_C1509_099.c.05159.05159.4	683	1244		3198.61	800.66	4	-4.7	0.31	0.17	26.87
TSKNTDR-VLKFYK-a3-b3	sp|P53851|TEX1_YEAST	sp|P17629|HPR1_YEAST	inter-protein xl	aleitner_C1509_093.c.04084.04084.4_aleitner_C1509_093.c.04016.04016.4	405	462		1754.95	439.745	4	-4.1	0.27	0	26.59
NKDTAPHIVVATPGR-NYLKLVDPGLKK-a2-b4	sp|Q07478|SUB2_YEAST	sp|P33441|MFT1_YEAST	inter-protein xl	aleitner_C1509_097.c.06456.06456.5_aleitner_C1509_097.c.06427.06427.5	181	174		3099.73	620.954	5	-5.1	0.39	0	26.5
DALELDEFCTLTEEEAEQKR-KVEALDDSFKEK-a19-b10	sp|P53552|THO2_YEAST	sp|P17629|HPR1_YEAST	inter-protein xl	aleitner_C1509_099.c.11671.11671.4_aleitner_C1509_099.c.11669.11669.4	1216	621		3970.87	993.725	4	-4.9	0.59	0.66	26.08
LNALSQKVIPPASPSQASILTEEVIR-SSDDLLTESLKK-a7-b11	sp|P53552|THO2_YEAST	sp|O13539|THP2_YEAST	inter-protein xl	aleitner_C1509_094.c.16528.16528.3_aleitner_C1509_094.c.16518.16518.3	16	52		4233.3	1412.11	3	0.4	0.5	0	26.01
FLDLQSSIDTKK-YDKYQTR-a11-b3	sp|P33441|MFT1_YEAST	sp|O13539|THP2_YEAST	inter-protein xl	aleitner_C1509_093.c.09656.09656.4_aleitner_C1509_093.c.09578.09578.4	82	72		2504.27	627.075	4	-4.2	0.43	0	25.82
IDSLKSEINAPSESYPVDK-ITSIFKEELLK-a5-b6	sp|O13539|THP2_YEAST	sp|P33441|MFT1_YEAST	inter-protein xl	aleitner_C1509_096.c.10447.10447.3_aleitner_C1509_096.c.10407.10407.3	240	242		3548.87	1183.96	3	-1.9	0.41	0	25.7
INSASQTEGDELKSEQTQPK-LQNDPPKSVASGSAGLNSK-a13-b7	sp|P17629|HPR1_YEAST	sp|P53552|THO2_YEAST	inter-protein xl	aleitner_C1509_096.c.04338.04338.4_aleitner_C1509_096.c.04353.04353.4	683	1260		4196.06	1050.02	4	-1.9	0.33	0	25.56
YSGNAGGKDGYGSSNYRGPSNDR-KDSSEER-a8-b1	sp|P53552|THO2_YEAST	sp|P33441|MFT1_YEAST	inter-protein xl	aleitner_C1509_099.c.02363.02363.5_aleitner_C1509_099.c.02341.02341.5	1415	182		3365.46	674.1	5	-5	0.27	0	25.43
TKVHYSEVDTPFNK-YINLLKR-a2-b6	sp|P33441|MFT1_YEAST	sp|O13539|THP2_YEAST	inter-protein xl	aleitner_C1509_099.c.08205.08205.5_aleitner_C1509_099.c.08191.08191.5	14	122		2720.45	545.097	5	-2.9	0.28	0	25.3
NYETACQNEQKQVALR-IGKDRPSR-a11-b3	sp|P53552|THO2_YEAST	sp|P53851|TEX1_YEAST	inter-protein xl	aleitner_C1509_098.c.03692.03692.4_aleitner_C1509_098.c.03655.03655.4	1238	412		3016.5	755.132	4	-6	0.32	0.59	24.96
IYDDFSKGPK-NYLDQIKMAR-a7-b7	sp|P33441|MFT1_YEAST	sp|O13539|THP2_YEAST	inter-protein xl	aleitner_C1509_099.c.09490.09490.4_aleitner_C1509_099.c.09433.09433.4	197	182		2557.27	640.326	4	-6.4	0.31	0	24.92
LKDALELDEFCTLTEEEAEQKR-KVEALDDSFKEK-a21-b10	sp|P53552|THO2_YEAST	sp|P17629|HPR1_YEAST	inter-protein xl	aleitner_C1509_096.c.09543.09543.5_aleitner_C1509_096.c.09483.09483.5	1216	621		4212.06	843.42	5	-2	0.34	0	24.9
ELESINASMKSDIENVR-AKFGLENK-a10-b2	sp|P33441|MFT1_YEAST	sp|O13539|THP2_YEAST	inter-protein xl	aleitner_C1509_099.c.10113.10113.4_aleitner_C1509_099.c.10082.10082.4	210	187		2977.49	745.382	4	-3.9	0.26	0	24.79
IGKLQGLYDSVQVINR-LSTLTKELNHWR-a3-b6	sp|P33441|MFT1_YEAST	sp|O13539|THP2_YEAST	inter-protein xl	aleitner_C1509_093.c.14816.14816.4_aleitner_C1509_093.c.14804.14804.4	123	205		3436.88	860.228	4	-0.9	0.29	0	24.78
NYETACQNEQKQVALR-IGKERK-a11-b3	sp|P53552|THO2_YEAST	sp|P17629|HPR1_YEAST	inter-protein xl	aleitner_C1509_094.c.03817.03817.4_aleitner_C1509_094.c.03790.03790.4	1238	646		2818.43	705.614	4	-4.8	0.48	0	24.44
ISSETSGGEAKDEIIR-KGSYVGIHSTGFK-a11-b1	sp|P17629|HPR1_YEAST	sp|Q07478|SUB2_YEAST	inter-protein xl	aleitner_C1509_099.c.06460.06460.4_aleitner_C1509_099.c.06438.06438.4	573	53		3208.62	803.162	4	-2.6	0.33	0.52	24.42
DVAAGVQNPKSISEYYSTFEHLNR-LENLKDKLPDIK-a10-b7	sp|O13539|THP2_YEAST	sp|P33441|MFT1_YEAST	inter-protein xl	aleitner_C1509_096.c.10358.10358.5_aleitner_C1509_096.c.10280.10280.5	98	106		4287.17	858.442	5	-8.2	0.13	0	24.38
ISEETNADIESKGK-TSKNTDR-a12-b3	sp|P53552|THO2_YEAST	sp|P53851|TEX1_YEAST	inter-protein xl	aleitner_C1509_098.c.02676.02676.4_aleitner_C1509_098.c.02650.02650.4	390	405		2478.2	620.556	4	-5.7	0.33	0.63	24.35
QEVSSYKEK-YINLLKR-a7-b6	sp|P33441|MFT1_YEAST	sp|O13539|THP2_YEAST	inter-protein xl	aleitner_C1509_094.c.07665.07665.4_aleitner_C1509_094.c.07630.07630.4	224	122		2153.16	539.299	4	-3.9	0.25	0.65	24.2
SDIENVRQEVSSYKEK-MIQKIDSLK-a14-b4	sp|P33441|MFT1_YEAST	sp|O13539|THP2_YEAST	inter-protein xl	aleitner_C1509_099.c.08754.08754.4_aleitner_C1509_099.c.08721.08721.4	224	235		3122.59	781.656	4	-7.3	0.19	0	24.14
LKDALELDEFCTLTEEEAEQKR-KLQDAR-a2-b1	sp|P53552|THO2_YEAST	sp|P17629|HPR1_YEAST	inter-protein xl	aleitner_C1509_098.c.09742.09742.5_aleitner_C1509_098.c.09720.09720.5	1197	635		3533.73	707.755	5	-6.2	0.34	0	23.99
EAQLLEDTKTGR-ITSIFKEELLK-a9-b6	sp|O13539|THP2_YEAST	sp|P33441|MFT1_YEAST	inter-protein xl	aleitner_C1509_099.c.11127.11127.4_aleitner_C1509_099.c.11069.11069.4	85	242		2817.53	705.39	4	-2.5	0.3	0	23.9
TKVHYSEVDTPFNK-FSWISSKLLNK-a2-b7	sp|P33441|MFT1_YEAST	sp|P53552|THO2_YEAST	inter-protein xl	aleitner_C1509_093.c.12894.12894.4_aleitner_C1509_093.c.12839.12839.4	14	148		3123.61	781.91	4	-6.8	0.31	0	23.87
DVAAGVQNPKSISEYYSTFEHLNR-DKLPDIKSIHSK-a10-b7	sp|O13539|THP2_YEAST	sp|P33441|MFT1_YEAST	inter-protein xl	aleitner_C1509_093.c.12901.12901.5_aleitner_C1509_093.c.12878.12878.5	98	111		4242.13	849.434	5	-6.3	0.22	0.38	23.63
EDSLIKEVETEK-DFLLKPELSR-a6-b5	sp|P33322|CBF5_YEAST	sp|Q07478|SUB2_YEAST	inter-protein xl	aleitner_C1509_098.c.07705.07705.4_aleitner_C1509_098.c.07677.07677.4	419	70		2773.45	694.369	4	-6.4	0.18	0	23.41
KVLKVDLTPHSSLR-RDSPSENEEKPNK-a1-b10	sp|P04517|POLG_TEV	sp|P53552|THO2_YEAST	inter-protein xl	aleitner_C1509_098.c.03705.03705.6_aleitner_C1509_098.c.03651.03651.6	1982	1533		3258.7	544.124	6	-7	0.27	0.66	23.38
LPVYMKHSNAMK-YINLLKR-a6-b6	sp|P17629|HPR1_YEAST	sp|O13539|THP2_YEAST	inter-protein xl	aleitner_C1509_098.c.07687.07687.5_aleitner_C1509_098.c.07664.07664.5	340	122		2474.34	495.877	5	-4.1	0.49	0	23.3
MNTSVEPVSLGESNLISYKQPLYEK-TKVHYSEVDTPFNK-a19-b2	sp|P17629|HPR1_YEAST	sp|P33441|MFT1_YEAST	inter-protein xl	aleitner_C1509_097.c.09700.09700.4_aleitner_C1509_097.c.09668.09668.4	171	14		4627.28	1157.83	4	-5.7	0.12	0.32	23.11
SNVWNKDCGEDQIK-LLYKINQEHR-a6-b4	sp|P53552|THO2_YEAST	sp|P17629|HPR1_YEAST	inter-protein xl	aleitner_C1509_099.c.06845.06845.4_aleitner_C1509_099.c.06827.06827.4	1020	627		3142.53	786.64	4	-7.3	0.28	0	22.92
SEINAPSESYPVDKEGDIVLE-KNALSGENTGHMSNR-a14-b1	sp|O13539|THP2_YEAST	sp|P53552|THO2_YEAST	inter-protein xl	aleitner_C1509_099.c.08354.08354.4_aleitner_C1509_099.c.08330.08330.4	254	967		4042.88	1011.73	4	-6.9	0.3	0	22.83
EDSLIKEVETEK-LIHKYK-a6-b4	sp|P33322|CBF5_YEAST	sp|P53552|THO2_YEAST	inter-protein xl	aleitner_C1509_098.c.04388.04388.4_aleitner_C1509_098.c.04332.04332.4	419	488		2357.26	590.322	4	-7.1	0.22	0.84	22.8
LQNDPPKSVASGSAGLNSK-KLQDAR-a7-b1	sp|P53552|THO2_YEAST	sp|P17629|HPR1_YEAST	inter-protein xl	aleitner_C1509_098.c.03666.03666.4_aleitner_C1509_098.c.03624.03624.4	1260	635		2736.43	685.115	4	-3.7	0.24	0	22.36
EDSLIKEVETEK-NYLDQIKMAR-a6-b7	sp|P33322|CBF5_YEAST	sp|O13539|THP2_YEAST	inter-protein xl	aleitner_C1509_099.c.08879.08879.4_aleitner_C1509_099.c.08838.08838.4	419	182		2807.4	702.859	4	-8.4	0.16	0	22.27
ELGTDLVKFLIEK-KHLIQNQIK-a8-b1	sp|P33441|MFT1_YEAST	sp|P53552|THO2_YEAST	inter-protein xl	aleitner_C1509_094.c.17104.17104.4_aleitner_C1509_094.c.17188.17188.4	165	983		2762.58	691.653	4	-5.7	0.11	0	21.67
VNEKTGVDGLFEEPR-KGSYVGIHSTGFK-a4-b1	sp|P17629|HPR1_YEAST	sp|Q07478|SUB2_YEAST	inter-protein xl	aleitner_C1509_099.c.08071.08071.4_aleitner_C1509_099.c.08053.08053.4	600	53		3206.61	802.66	4	-4.6	0.27	0	21.33
TKVHYSEVDTPFNK-SKYELK-a2-b2	sp|P33441|MFT1_YEAST	sp|P53552|THO2_YEAST	inter-protein xl	aleitner_C1509_098.c.06090.06090.4_aleitner_C1509_098.c.06058.06058.4	14	166		2568.3	643.082	4	-6.1	0.16	0	21.28
NYETACQNEQKQVALRK-GLNERETGIKR-a11-b10	sp|P53552|THO2_YEAST	sp|P16521|EF3A_YEAST	inter-protein xl	aleitner_C1509_094.c.09592.09592.4_aleitner_C1509_094.c.09436.09436.4	1238	263		3488.76	873.197	4	-6.1	0.32	0	21.21
Inter-subunit cross-links
Id	Protein1	Protein2	XLType	Spectrum	AbsPos1	AbsPos2	deltaAA	Mr	Mz	z	Error_rel[ppm]	TIC	deltaS	ld-Score
IKDPDFYR-VLKFYK-a2-b3	sp|P17629|HPR1_YEAST	sp|P17629|HPR1_YEAST	intra-protein xl	aleitner_C1509_094.c.09490.09490.4_aleitner_C1509_094.c.09300.09300.4	467	462	5	1987.07	497.776	4	-5.2	0.65	0	35.32
IEKLTEQNISQLK-YLDILGKVTK-a3-b7	sp|P33441|MFT1_YEAST	sp|P33441|MFT1_YEAST	intra-protein xl	aleitner_C1509_099.c.11406.11406.4_aleitner_C1509_099.c.11384.11384.4	55	33	22	2829.6	708.408	4	-3.6	0.63	0	34.58
ISSETSGGEAKDEIIR-VNEKTGVDGLFEEPR-a11-b4	sp|P17629|HPR1_YEAST	sp|P17629|HPR1_YEAST	intra-protein xl	aleitner_C1509_093.c.11510.11510.3_aleitner_C1509_093.c.11456.11456.3	573	600	27	3517.73	1173.59	3	-2.8	0.46	0	33.53
NYLKLVDPGLKK-IYDDFSKGPK-a4-b7	sp|P33441|MFT1_YEAST	sp|P33441|MFT1_YEAST	intra-protein xl	aleitner_C1509_098.c.08429.08429.5_aleitner_C1509_098.c.08401.08401.5	174	197	23	2693.45	539.699	5	-5.2	0.49	0.4	33.48
LPDIKSIHSK-LENLKDK-a5-b5	sp|P33441|MFT1_YEAST	sp|P33441|MFT1_YEAST	intra-protein xl	aleitner_C1509_099.c.05535.05535.4_aleitner_C1509_099.c.05527.05527.4	111	104	7	2133.2	534.307	4	-4.5	0.47	0	33.41
YINLLKR-YSLKER-a6-b4	sp|O13539|THP2_YEAST	sp|O13539|THP2_YEAST	intra-protein xl	aleitner_C1509_094.c.09065.09065.4_aleitner_C1509_094.c.09002.09002.4	122	197	75	1851.05	463.771	4	-4.5	0.45	0	32.81
NYLKLVDPGLK-IYDDFSKGPK-a4-b7	sp|P33441|MFT1_YEAST	sp|P33441|MFT1_YEAST	intra-protein xl	aleitner_C1509_099.c.09986.09986.4_aleitner_C1509_099.c.09953.09953.4	174	197	23	2565.36	642.348	4	-5.2	0.51	0.57	32.75
IGKLQGLYDSVQVINR-SIHSKLLLR-a3-b5	sp|P33441|MFT1_YEAST	sp|P33441|MFT1_YEAST	intra-protein xl	aleitner_C1509_094.c.14325.14325.4_aleitner_C1509_094.c.14279.14279.4	123	116	7	3005.73	752.441	4	-1.5	0.41	0	32.66
SIHSKLLLR-DKLPDIK-a5-b2	sp|P33441|MFT1_YEAST	sp|P33441|MFT1_YEAST	intra-protein xl	aleitner_C1509_098.c.07858.07858.4_aleitner_C1509_098.c.07807.07807.4	116	106	10	2031.2	508.807	4	-6	0.58	0	32.56
KVEALDDSFKEK-LLYKINQEHR-a10-b4	sp|P17629|HPR1_YEAST	sp|P17629|HPR1_YEAST	intra-protein xl	aleitner_C1509_097.c.05248.05248.5_aleitner_C1509_097.c.05219.05219.5	621	627	6	2858.5	572.708	5	-5.6	0.57	0.35	32.33
LSTLTKELNHWR-YSLKER-a6-b4	sp|O13539|THP2_YEAST	sp|O13539|THP2_YEAST	intra-protein xl	aleitner_C1509_094.c.08981.08981.4_aleitner_C1509_094.c.09305.09305.4	205	197	8	2429.3	608.333	4	-3.1	0.46	0.41	31.84
INSASQTEGDELKSEQTQPK-IKSQR-a13-b2	sp|P17629|HPR1_YEAST	sp|P17629|HPR1_YEAST	intra-protein xl	aleitner_C1509_098.c.02981.02981.3_aleitner_C1509_098.c.02952.02952.3	683	667	16	2957.48	986.834	3	-5.3	0.54	0.48	31.84
VNEKTGVDGLFEEPR-KVEALDDSFK-a4-b1	sp|P17629|HPR1_YEAST	sp|P17629|HPR1_YEAST	intra-protein xl	aleitner_C1509_097.c.08308.08308.4_aleitner_C1509_097.c.08294.08294.4	600	612	12	2977.48	745.377	4	-5.4	0.36	0	31.76
DSPSENEEKPNKR-FKKDETIR-a12-b3	sp|P53552|THO2_YEAST	sp|P53552|THO2_YEAST	intra-protein xl	aleitner_C1509_099.c.02444.02444.4_aleitner_C1509_099.c.02411.02411.4	1536	1540	4	2702.34	676.592	4	-5	0.65	0	31.7
GPKELESINASMK-KDSSEER-a3-b1	sp|P33441|MFT1_YEAST	sp|P33441|MFT1_YEAST	intra-protein xl	aleitner_C1509_099.c.04595.04595.4_aleitner_C1509_099.c.04549.04549.4	200	182	18	2390.16	598.547	4	-3.7	0.33	0	31.68
YDKYQTR-YINLLKR-a3-b6	sp|O13539|THP2_YEAST	sp|O13539|THP2_YEAST	intra-protein xl	aleitner_C1509_094.c.08140.08140.4_aleitner_C1509_094.c.08078.08078.4	72	122	50	2029.09	508.28	4	-4.8	0.55	0.53	31.63
NYETACQNEQKQVALR-KQLELNK-a11-b1	sp|P53552|THO2_YEAST	sp|P53552|THO2_YEAST	intra-protein xl	aleitner_C1509_094.c.06887.06887.3_aleitner_C1509_094.c.06842.06842.3	1238	1244	6	2960.49	987.838	3	-3.7	0.45	0.45	31.56
IEQEVKKPEGVYEAAQAK-ISSETSGGEAKDEIIR-a6-b11	sp|P17629|HPR1_YEAST	sp|P17629|HPR1_YEAST	intra-protein xl	aleitner_C1509_099.c.06336.06336.5_aleitner_C1509_099.c.06299.06299.5	546	573	27	3844.95	769.997	5	-3.4	0.34	0.34	31.54
YIKNISR-IDSLKR-a3-b5	sp|P53552|THO2_YEAST	sp|P53552|THO2_YEAST	intra-protein xl	aleitner_C1509_094.c.05310.05310.3_aleitner_C1509_094.c.05237.05237.3	1379	1375	4	1761.01	588.009	3	-5.8	0.46	0	31.01
KVEALDDSFKEK-KLQDAR-a10-b1	sp|P17629|HPR1_YEAST	sp|P17629|HPR1_YEAST	intra-protein xl	aleitner_C1509_099.c.04109.04109.4_aleitner_C1509_099.c.04077.04077.4	621	635	14	2275.19	569.806	4	-5.1	0.38	0	30.88
DKISEETNADIESKGK-VSFNKAER-a14-b5	sp|P53552|THO2_YEAST	sp|P53552|THO2_YEAST	intra-protein xl	aleitner_C1509_099.c.05461.05461.4_aleitner_C1509_099.c.05429.05429.4	390	634	244	2850.43	713.615	4	1	0.47	0	30.62
EKYIDLSHVK-LKALVR-a2-b2	sp|Q07478|SUB2_YEAST	sp|Q07478|SUB2_YEAST	intra-protein xl	aleitner_C1509_099.c.06996.06996.5_aleitner_C1509_099.c.06963.06963.5	202	196	6	2067.19	414.447	5	-7.6	0.36	0	30.61
LLYKINQEHR-KLQDAR-a4-b1	sp|P17629|HPR1_YEAST	sp|P17629|HPR1_YEAST	intra-protein xl	aleitner_C1509_093.c.04275.04275.4_aleitner_C1509_093.c.04276.04276.4	627	635	8	2180.2	546.057	4	-4.9	0.34	0	30.48
NKFQTQDYR-KDETIR-a2-b1	sp|P53552|THO2_YEAST	sp|P53552|THO2_YEAST	intra-protein xl	aleitner_C1509_094.c.04947.04947.3_aleitner_C1509_094.c.04893.04893.3	1547	1540	7	2097.04	700.021	3	-4.7	0.5	0.3	30.45
TKVHYSEVDTPFNK-FLDLQSSIDTKK-a2-b11	sp|P33441|MFT1_YEAST	sp|P33441|MFT1_YEAST	intra-protein xl	aleitner_C1509_094.c.10874.10874.5_aleitner_C1509_094.c.10837.10837.5	14	82	68	3195.63	640.133	5	-1.9	0.31	0.41	30.22
SNVWNKDCGEDQIK-ISKDLFTTFWR-a6-b3	sp|P53552|THO2_YEAST	sp|P53552|THO2_YEAST	intra-protein xl	aleitner_C1509_094.c.15902.15902.4_aleitner_C1509_094.c.15857.15857.4	1020	942	78	3242.56	811.648	4	-3.5	0.38	0	30.17
EKYIDLSHVK-DAELLKNK-a2-b6	sp|Q07478|SUB2_YEAST	sp|Q07478|SUB2_YEAST	intra-protein xl	aleitner_C1509_098.c.06955.06955.4_aleitner_C1509_098.c.06911.06911.4	202	179	23	2298.23	575.565	4	-8.3	0.47	0	29.94
INSASQTEGDELKSEQTQPK-GEISEENTKIK-a13-b9	sp|P17629|HPR1_YEAST	sp|P17629|HPR1_YEAST	intra-protein xl	aleitner_C1509_099.c.04859.04859.4_aleitner_C1509_099.c.04892.04892.4	683	699	16	3573.74	894.443	4	-3.1	0.46	0	29.92
KSNTQALPQGPK-NKFQTQDYR-a1-b2	sp|P53552|THO2_YEAST	sp|P53552|THO2_YEAST	intra-protein xl	aleitner_C1509_093.c.05329.05329.4_aleitner_C1509_093.c.05298.05298.4	1576	1547	29	2604.32	652.087	4	-4.7	0.37	0	29.85
ISSETSGGEAKDEIIR-KPEGVYEAAQAK-a11-b1	sp|P17629|HPR1_YEAST	sp|P17629|HPR1_YEAST	intra-protein xl	aleitner_C1509_094.c.07346.07346.4_aleitner_C1509_094.c.07275.07275.4	573	547	26	3118.55	780.645	4	-6	0.35	0	29.83
KVEALDDSFK-EKLLYK-a1-b2	sp|P17629|HPR1_YEAST	sp|P17629|HPR1_YEAST	intra-protein xl	aleitner_C1509_098.c.07097.07097.3_aleitner_C1509_098.c.07054.07054.3	612	623	11	2081.12	694.714	3	-5.5	0.29	0	29.82
ELGTDLVKFLIEK-KDSSEER-a8-b1	sp|P33441|MFT1_YEAST	sp|P33441|MFT1_YEAST	intra-protein xl	aleitner_C1509_098.c.12286.12286.4_aleitner_C1509_098.c.12285.12285.4	165	182	17	2491.3	623.831	4	-4.5	0.44	0	29.62
LSLYDIHFDKSLYDER-KNALSGENTGHMSNR-a10-b1	sp|P53552|THO2_YEAST	sp|P53552|THO2_YEAST	intra-protein xl	aleitner_C1509_098.c.09267.09267.4_aleitner_C1509_098.c.09213.09213.4	960	967	7	3765.78	942.453	4	-7.1	0.29	0	29.59
DSPSENEEKPNKR-NKFQTQDYR-a12-b2	sp|P53552|THO2_YEAST	sp|P53552|THO2_YEAST	intra-protein xl	aleitner_C1509_099.c.03218.03218.3_aleitner_C1509_099.c.03212.03212.3	1536	1547	11	2865.34	956.121	3	-4.5	0.52	0	29.44
ISSETSGGEAKDEIIR-KPEGVYEAAQAKWESK-a11-b12	sp|P17629|HPR1_YEAST	sp|P17629|HPR1_YEAST	intra-protein xl	aleitner_C1509_098.c.08478.08478.5_aleitner_C1509_098.c.08383.08383.5	573	558	15	3648.8	730.768	5	-4.7	0.39	0.59	29.41
LQNDPPKSVASGSAGLNSK-NYETACQNEQKQVALR-a7-b11	sp|P53552|THO2_YEAST	sp|P53552|THO2_YEAST	intra-protein xl	aleitner_C1509_098.c.05605.05605.4_aleitner_C1509_098.c.05599.05599.4	1260	1238	22	3957.93	990.491	4	-3.7	0.43	0.25	29.3
KTHEVIVK-KALDR-a1-b1	sp|P38922|HRB1_YEAST	sp|P38922|HRB1_YEAST	intra-protein xl	aleitner_C1509_099.c.02294.02294.4_aleitner_C1509_099.c.02258.02258.4	259	247	12	1691.99	424.004	4	-4.1	0.44	0	29.18
FPEKPFQEGK-LREEYKK-a4-b6	sp|P53552|THO2_YEAST	sp|P53552|THO2_YEAST	intra-protein xl	aleitner_C1509_099.c.05046.05046.4_aleitner_C1509_099.c.05014.05014.4	1503	1489	14	2308.2	578.057	4	-5.2	0.4	0.54	29.13
NYLKLVDPGLK-KDSSEER-a4-b1	sp|P33441|MFT1_YEAST	sp|P33441|MFT1_YEAST	intra-protein xl	aleitner_C1509_098.c.07034.07034.4_aleitner_C1509_098.c.07019.07019.4	174	182	8	2246.16	562.549	4	-6.8	0.53	0	29.11
KALDRGELR-KTHEVIVK-a1-b1	sp|P38922|HRB1_YEAST	sp|P38922|HRB1_YEAST	intra-protein xl	aleitner_C1509_099.c.03073.03073.5_aleitner_C1509_099.c.03031.03031.5	247	259	12	2147.23	430.454	5	-4.7	0.42	0.14	28.99
FKKDETIR-LREEYKK-a3-b6	sp|P53552|THO2_YEAST	sp|P53552|THO2_YEAST	intra-protein xl	aleitner_C1509_099.c.02973.02973.5_aleitner_C1509_099.c.02932.02932.5	1540	1489	51	2138.16	428.64	5	-5.2	0.29	0.34	28.74
LSTLTKELNHWRK-YSLKER-a6-b4	sp|O13539|THP2_YEAST	sp|O13539|THP2_YEAST	intra-protein xl	aleitner_C1509_094.c.07601.07601.4_aleitner_C1509_094.c.07766.07766.4	205	197	8	2557.39	640.355	4	-5.4	0.23	0.52	28.62
INSASQTEGDELKSEQTQPK-KLQDAR-a13-b1	sp|P17629|HPR1_YEAST	sp|P17629|HPR1_YEAST	intra-protein xl	aleitner_C1509_098.c.03524.03524.4_aleitner_C1509_098.c.03500.03500.4	683	635	48	3056.52	765.138	4	-2.1	0.21	0.44	28.62
GPKELESINASMK-NYLKLVDPGLK-a3-b4	sp|P33441|MFT1_YEAST	sp|P33441|MFT1_YEAST	intra-protein xl	aleitner_C1509_094.c.12607.12607.4_aleitner_C1509_094.c.12580.12580.4	200	174	26	2799.51	700.884	4	-1.7	0.37	0	28.51
LQNDPPKSVASGSAGLNSK-KQLELNK-a7-b1	sp|P53552|THO2_YEAST	sp|P53552|THO2_YEAST	intra-protein xl	aleitner_C1509_094.c.06326.06326.4_aleitner_C1509_094.c.06246.06246.4	1260	1244	16	2878.52	720.638	4	-6.1	0.4	0.35	28.49
IEQEVKKPEGVYEAAQAK-ISSETSGGEAKDEIIR-a7-b11	sp|P17629|HPR1_YEAST	sp|P17629|HPR1_YEAST	intra-protein xl	aleitner_C1509_099.c.06347.06347.4_aleitner_C1509_099.c.06302.06302.4	547	573	26	3844.94	962.243	4	-5	0.6	0	28.44
WGLGPVAQKK-ADGKLDK-a9-b4	sp|P33322|CBF5_YEAST	sp|P33322|CBF5_YEAST	intra-protein xl	aleitner_C1509_094.c.07499.07499.4_aleitner_C1509_094.c.07447.07447.4	358	367	9	1966.08	492.527	4	-5.4	0.2	0.83	28.35
KVEALDDSFKEK-LLYKINQEHRK-a10-b4	sp|P17629|HPR1_YEAST	sp|P17629|HPR1_YEAST	intra-protein xl	aleitner_C1509_097.c.04393.04393.5_aleitner_C1509_097.c.04377.04377.5	621	627	6	2986.61	598.329	5	-1.9	0.3	0.22	28.26
VNEKTGVDGLFEEPR-EKLLYK-a4-b2	sp|P17629|HPR1_YEAST	sp|P17629|HPR1_YEAST	intra-protein xl	aleitner_C1509_098.c.08943.08943.3_aleitner_C1509_098.c.08992.08992.3	600	623	23	2619.36	874.129	3	-6.6	0.35	0	28.26
DSPSENEEKPNKR-FKKDETIR-a9-b3	sp|P53552|THO2_YEAST	sp|P53552|THO2_YEAST	intra-protein xl	aleitner_C1509_099.c.02444.02444.4_aleitner_C1509_099.c.02577.02577.4	1533	1540	7	2702.34	676.592	4	-5	0.66	0	28.21
KVEALDDSFK-LLYKINQEHR-a1-b4	sp|P17629|HPR1_YEAST	sp|P17629|HPR1_YEAST	intra-protein xl	aleitner_C1509_098.c.06732.06732.5_aleitner_C1509_098.c.06711.06711.5	612	627	15	2601.36	521.281	5	-6.5	0.38	0.56	28.2
YLFDFDKVNEK-KVEALDDSFK-a7-b1	sp|P17629|HPR1_YEAST	sp|P17629|HPR1_YEAST	intra-protein xl	aleitner_C1509_094.c.13466.13466.4_aleitner_C1509_094.c.13412.13412.4	596	612	16	2705.33	677.34	4	-7	0.46	0	28.15
LSTLTKELNHWR-YINLLKR-a6-b6	sp|O13539|THP2_YEAST	sp|O13539|THP2_YEAST	intra-protein xl	aleitner_C1509_094.c.11909.11909.5_aleitner_C1509_094.c.11875.11875.5	205	122	83	2553.43	511.694	5	-5.3	0.27	0	27.95
AIEQLNYTPIKGR-LKGFGFVNYEK-a11-b2	sp|P04147|PABP_YEAST	sp|P04147|PABP_YEAST	intra-protein xl	aleitner_C1509_099.c.10476.10476.4_aleitner_C1509_099.c.10439.10439.4	105	259	154	2940.56	736.148	4	-5.2	0.43	0	27.95
IKDPDFYR-IKMNNR-a2-b2	sp|P17629|HPR1_YEAST	sp|P17629|HPR1_YEAST	intra-protein xl	aleitner_C1509_094.c.05371.05371.4_aleitner_C1509_094.c.05274.05274.4	467	307	160	1965.01	492.259	4	-4.3	0.47	0	27.67
YSGNAGGKDGYGSSNYRGPSNDR-YIKNISR-a8-b3	sp|P53552|THO2_YEAST	sp|P53552|THO2_YEAST	intra-protein xl	aleitner_C1509_099.c.04108.04108.5_aleitner_C1509_099.c.04056.04056.5	1415	1379	36	3408.59	682.725	5	-6.1	0.45	0	27.51
NYLDQIKMAR-AKFGLENK-a7-b2	sp|O13539|THP2_YEAST	sp|O13539|THP2_YEAST	intra-protein xl	aleitner_C1509_094.c.11547.11547.3_aleitner_C1509_094.c.11487.11487.3	182	187	5	2294.2	765.741	3	-4.1	0.43	0	27.44
LLYKINQEHRK-KLQDAR-a4-b1	sp|P17629|HPR1_YEAST	sp|P17629|HPR1_YEAST	intra-protein xl	aleitner_C1509_099.c.02907.02907.4_aleitner_C1509_099.c.02884.02884.4	627	635	8	2308.29	578.08	4	-5.4	0.3	0	27.31
LLYKINQEHRK-KVEALDDSFK-a4-b1	sp|P17629|HPR1_YEAST	sp|P17629|HPR1_YEAST	intra-protein xl	aleitner_C1509_099.c.05669.05669.4_aleitner_C1509_099.c.05656.05656.4	627	612	15	2729.46	683.373	4	-4.7	0.35	0	27.29
VSAKTSNEEAAGK-QALGEQLYKK-a4-b9	sp|P04147|PABP_YEAST	sp|P04147|PABP_YEAST	intra-protein xl	aleitner_C1509_098.c.04063.04063.3_aleitner_C1509_098.c.04032.04032.3	520	515	5	2605.35	869.458	3	-3.9	0.3	0	27.25
IDNGILAHKPR-LIHKYK-a9-b4	sp|P53552|THO2_YEAST	sp|P53552|THO2_YEAST	intra-protein xl	aleitner_C1509_098.c.04814.04814.5_aleitner_C1509_098.c.04745.04745.5	482	488	6	2171.24	435.257	5	-5.8	0.29	0.72	27.08
FPEKPFQEGKDSSK-KNSSQR-a10-b1	sp|P53552|THO2_YEAST	sp|P53552|THO2_YEAST	intra-protein xl	aleitner_C1509_098.c.02542.02542.4_aleitner_C1509_098.c.02523.02523.4	1509	1490	19	2479.22	620.814	4	-4.3	0.27	0.6	27.03
AEWEKELGTDLVK-LVDPGLKK-a5-b7	sp|P33441|MFT1_YEAST	sp|P33441|MFT1_YEAST	intra-protein xl	aleitner_C1509_098.c.09533.09533.4_aleitner_C1509_098.c.09506.09506.4	157	181	24	2523.37	631.85	4	-6.6	0.31	0	26.91
EYKIGK-KLQDAR-a3-b1	sp|P17629|HPR1_YEAST	sp|P17629|HPR1_YEAST	intra-protein xl	aleitner_C1509_093.c.02912.02912.3_aleitner_C1509_093.c.02891.02891.3	643	635	8	1603.88	535.635	3	-7.4	0.2	0	26.82
SWYIMSGKNDTLSNHFVK-SLANYKTDPVLK-a8-b6	sp|P53851|TEX1_YEAST	sp|P53851|TEX1_YEAST	intra-protein xl	aleitner_C1509_099.c.10684.10684.5_aleitner_C1509_099.c.10659.10659.5	358	339	19	3611.82	723.372	5	-4	0.4	0	26.81
LKDALELDEFCTLTEEEAEQKR-KQLELNK-a2-b1	sp|P53552|THO2_YEAST	sp|P53552|THO2_YEAST	intra-protein xl	aleitner_C1509_097.c.09395.09395.4_aleitner_C1509_097.c.09351.09351.4	1197	1244	47	3675.85	919.97	4	-2.2	0.19	0.29	26.78
KFADTYR-KIFVR-a1-b1	sp|P38922|HRB1_YEAST	sp|P38922|HRB1_YEAST	intra-protein xl	aleitner_C1509_093.c.06700.06700.4_aleitner_C1509_093.c.06636.06636.4	50	229	179	1698.94	425.742	4	-5.7	0.25	0	26.71
HLIQNQIKDILVTGISHQR-KNALSGENTGHMSNR-a8-b1	sp|P53552|THO2_YEAST	sp|P53552|THO2_YEAST	intra-protein xl	aleitner_C1509_097.c.07735.07735.5_aleitner_C1509_097.c.07652.07652.5	991	967	24	3965.04	794.016	5	-5.7	0.33	0.34	26.61
FPEKPFQEGKDSSK-LREEYKK-a10-b6	sp|P53552|THO2_YEAST	sp|P53552|THO2_YEAST	intra-protein xl	aleitner_C1509_098.c.03634.03634.4_aleitner_C1509_098.c.03601.03601.4	1509	1489	20	2725.38	682.352	4	-6.6	0.36	0	26.61
LSTLTKELNHWR-MIQKIDSLK-a6-b4	sp|O13539|THP2_YEAST	sp|O13539|THP2_YEAST	intra-protein xl	aleitner_C1509_099.c.08865.08865.4_aleitner_C1509_099.c.08840.08840.4	205	235	30	2709.47	678.376	4	-6.4	0.55	0.61	26.21
WVPSEKLQGILEQYCAPDTDIR-AKFGLENK-a6-b2	sp|O13539|THP2_YEAST	sp|O13539|THP2_YEAST	intra-protein xl	aleitner_C1509_098.c.13935.13935.4_aleitner_C1509_098.c.13912.13912.4	152	187	35	3660.84	916.217	4	-4	0.33	0	26.17
YSGNAGGKDGYGSSNYR-SELPTRPSKSK-a8-b9	sp|P53552|THO2_YEAST	sp|P53552|THO2_YEAST	intra-protein xl	aleitner_C1509_098.c.03378.03378.4_aleitner_C1509_098.c.03357.03357.4	1415	1455	40	3118.47	780.625	4	-8.9	0.39	0	26.17
TAVFYGGTPISKDAELLK-NKDTAPHIVVATPGR-a12-b2	sp|Q07478|SUB2_YEAST	sp|Q07478|SUB2_YEAST	intra-protein xl	aleitner_C1509_097.c.08334.08334.4_aleitner_C1509_097.c.08282.08282.4	173	181	8	3621.93	906.492	4	-1.5	0.43	0	26.1
SSDDLLTESLKK-YINLLKR-a11-b6	sp|O13539|THP2_YEAST	sp|O13539|THP2_YEAST	intra-protein xl	aleitner_C1509_099.c.10379.10379.4_aleitner_C1509_099.c.10356.10356.4	52	122	70	2391.32	598.837	4	-3.4	0.3	0.37	26.09
WESKISSETSGGEAKDEIIR-KPEGVYEAAQAK-a4-b1	sp|P17629|HPR1_YEAST	sp|P17629|HPR1_YEAST	intra-protein xl	aleitner_C1509_097.c.05558.05558.4_aleitner_C1509_097.c.05535.05535.4	562	547	15	3648.8	913.207	4	-5.2	0.38	0	26.07
ISEETNADIESKGK-QKTQQDILLFGK-a12-b2	sp|P53552|THO2_YEAST	sp|P53552|THO2_YEAST	intra-protein xl	aleitner_C1509_099.c.07954.07954.3_aleitner_C1509_099.c.07920.07920.3	390	394	4	3075.58	1026.2	3	-5.3	0.2	0.45	26.02
VTKLTGSIINGTLSNDDSK-IEKLTEQNISQLK-a3-b3	sp|P33441|MFT1_YEAST	sp|P33441|MFT1_YEAST	intra-protein xl	aleitner_C1509_093.c.12452.12452.4_aleitner_C1509_093.c.12399.12399.4	36	55	19	3642.95	911.745	4	-1.8	0.3	0	25.96
NYETACQNEQKQVALR-SVASGSAGLNSKDR-a11-b12	sp|P53552|THO2_YEAST	sp|P53552|THO2_YEAST	intra-protein xl	aleitner_C1509_098.c.04926.04926.4_aleitner_C1509_098.c.04871.04871.4	1238	1272	34	3436.65	860.17	4	-3.9	0.26	0	25.81
IGKLQGLYDSVQVINR-KDSSEER-a3-b1	sp|P33441|MFT1_YEAST	sp|P33441|MFT1_YEAST	intra-protein xl	aleitner_C1509_098.c.09287.09287.4_aleitner_C1509_098.c.09251.09251.4	123	182	59	2789.44	698.368	4	-5.6	0.36	0	25.52
YSGNAGGKDGYGSSNYR-KSNTQALPQGPK-a8-b1	sp|P53552|THO2_YEAST	sp|P53552|THO2_YEAST	intra-protein xl	aleitner_C1509_098.c.03719.03719.4_aleitner_C1509_098.c.03689.03689.4	1415	1576	161	3157.49	790.38	4	-5.3	0.29	0	25.49
GPKELESINASMK-NYLKLVDPGLKK-a3-b4	sp|P33441|MFT1_YEAST	sp|P33441|MFT1_YEAST	intra-protein xl	aleitner_C1509_098.c.08740.08740.5_aleitner_C1509_098.c.08722.08722.5	200	174	26	2927.59	586.526	5	-3.9	0.31	0	25.48
VNEKTGVDGLFEEPR-KLQDAR-a4-b1	sp|P17629|HPR1_YEAST	sp|P17629|HPR1_YEAST	intra-protein xl	aleitner_C1509_098.c.06822.06822.4_aleitner_C1509_098.c.06806.06806.4	600	635	35	2556.31	640.085	4	-4.3	0.28	0	25.35
DSSKANPYQASSYKR-FPEKPFQEGK-a4-b4	sp|P53552|THO2_YEAST	sp|P53552|THO2_YEAST	intra-protein xl	aleitner_C1509_099.c.05942.05942.4_aleitner_C1509_099.c.05885.05885.4	1513	1503	10	3044.46	762.124	4	-8.2	0.33	0.87	25.28
DVAAGVQNPKSISEYYSTFEHLNR-EAQLLEDTKTGR-a10-b9	sp|O13539|THP2_YEAST	sp|O13539|THP2_YEAST	intra-protein xl	aleitner_C1509_094.c.14063.14063.4_aleitner_C1509_094.c.14019.14019.4	98	85	13	4222.08	1056.53	4	-1.5	0.2	0.51	25.25
IDSLKSEINAPSESYPVDK-YINLLKR-a5-b6	sp|O13539|THP2_YEAST	sp|O13539|THP2_YEAST	intra-protein xl	aleitner_C1509_098.c.10140.10140.4_aleitner_C1509_098.c.10088.10088.4	240	122	118	3147.66	787.922	4	-4.7	0.32	0	25.16
TKVHYSEVDTPFNK-YLDILGKVTK-a2-b7	sp|P33441|MFT1_YEAST	sp|P33441|MFT1_YEAST	intra-protein xl	aleitner_C1509_099.c.09944.09944.4_aleitner_C1509_099.c.09889.09889.4	14	33	19	2950.56	738.648	4	-2.4	0.61	0	25.07
EPYPDTTSSYSEAAAPEYTKR-NKFQTQDYR-a20-b2	sp|P53552|THO2_YEAST	sp|P53552|THO2_YEAST	intra-protein xl	aleitner_C1509_099.c.07060.07060.4_aleitner_C1509_099.c.06980.06980.4	1403	1547	144	3698.69	925.679	4	-4	0.38	0	25.05
DSPSENEEKPNKR-KSNTQALPQGPK-a9-b1	sp|P53552|THO2_YEAST	sp|P53552|THO2_YEAST	intra-protein xl	aleitner_C1509_099.c.02259.02259.4_aleitner_C1509_099.c.02246.02246.4	1533	1576	43	2934.45	734.621	4	-5.4	0.35	0	24.73
EPYPDTTSSYSEAAAPEYTKR-YSGNAGGKDGYGSSNYR-a20-b8	sp|P53552|THO2_YEAST	sp|P53552|THO2_YEAST	intra-protein xl	aleitner_C1509_098.c.06113.06113.4_aleitner_C1509_098.c.06064.06064.4	1403	1415	12	4251.86	1063.97	4	-4.3	0.45	0	24.73
VNEKTGVDGLFEEPR-KPEGVYEAAQAK-a4-b1	sp|P17629|HPR1_YEAST	sp|P17629|HPR1_YEAST	intra-protein xl	aleitner_C1509_098.c.07931.07931.4_aleitner_C1509_098.c.07893.07893.4	600	547	53	3116.56	780.147	4	-3.4	0.28	0	24.72
FGLENKYSLK-NYLDQIKMAR-a6-b7	sp|O13539|THP2_YEAST	sp|O13539|THP2_YEAST	intra-protein xl	aleitner_C1509_098.c.10840.10840.4_aleitner_C1509_098.c.10812.10812.4	193	182	11	2586.34	647.593	4	-4.6	0.52	0	24.68
NIKPISSYAHKR-SELPTRPSKSK-a11-b9	sp|P53552|THO2_YEAST	sp|P53552|THO2_YEAST	intra-protein xl	aleitner_C1509_097.c.03005.03005.5_aleitner_C1509_097.c.02994.02994.5	1445	1455	10	2779.51	556.91	5	-7.8	0.15	0	24.62
AKFGLENK-YINLLKR-a2-b6	sp|O13539|THP2_YEAST	sp|O13539|THP2_YEAST	intra-protein xl	aleitner_C1509_094.c.10596.10596.4_aleitner_C1509_094.c.10534.10534.4	187	122	65	1962.12	491.539	4	-2.8	0.46	0	24.57
SAPKNIKPISSYAHK-KNSSQR-a7-b1	sp|P53552|THO2_YEAST	sp|P53552|THO2_YEAST	intra-protein xl	aleitner_C1509_099.c.02357.02357.5_aleitner_C1509_099.c.02337.02337.5	1437	1490	53	2496.33	500.274	5	-4.9	0.33	0	24.53
SREDDDEVHFDKTTFSK-LIHVPKEDNSK-a12-b6	sp|P15424|MS116_YEAST	sp|P15424|MS116_YEAST	intra-protein xl	aleitner_C1509_096.c.05271.05271.5_aleitner_C1509_096.c.05251.05251.5	84	95	11	3471.66	695.341	5	-4.2	0.2	0	24.29
NYETACQNEQKQVALR-KQLELNKSQR-a11-b7	sp|P53552|THO2_YEAST	sp|P53552|THO2_YEAST	intra-protein xl	aleitner_C1509_094.c.05739.05739.4_aleitner_C1509_094.c.05703.05703.4	1238	1250	12	3331.67	833.925	4	-7.3	0.13	0.91	24.21
EAQLLEDTKTGR-YINLLKR-a9-b6	sp|O13539|THP2_YEAST	sp|O13539|THP2_YEAST	intra-protein xl	aleitner_C1509_099.c.08832.08832.4_aleitner_C1509_099.c.08792.08792.4	85	122	37	2416.32	605.088	4	-4.1	0.35	0	24.17
DKISEETNADIESKGK-QKTQQDILLFGK-a14-b2	sp|P53552|THO2_YEAST	sp|P53552|THO2_YEAST	intra-protein xl	aleitner_C1509_099.c.08019.08019.4_aleitner_C1509_099.c.08043.08043.4	390	394	4	3318.7	830.684	4	-4.9	0.16	0.44	24.09
KFTENVVGGGER-KTHEVIVK-a1-b1	sp|P38922|HRB1_YEAST	sp|P38922|HRB1_YEAST	intra-protein xl	aleitner_C1509_099.c.04011.04011.4_aleitner_C1509_099.c.03996.03996.4	363	259	104	2382.28	596.578	4	-5	0.41	0.33	24.08
FPEKPFQEGK-KNSSQR-a4-b1	sp|P53552|THO2_YEAST	sp|P53552|THO2_YEAST	intra-protein xl	aleitner_C1509_094.c.04356.04356.4_aleitner_C1509_094.c.04257.04257.4	1503	1490	13	2062.04	516.518	4	-4.1	0.22	0.77	23.96
VADENWETCQQETLAKLENLK-DKLPDIK-a16-b2	sp|P33441|MFT1_YEAST	sp|P33441|MFT1_YEAST	intra-protein xl	aleitner_C1509_097.c.11509.11509.4_aleitner_C1509_097.c.11482.11482.4	99	106	7	3483.72	871.939	4	-6	0.24	0	23.93
YSGNAGGKDGYGSSNYRGPSNDR-SELPTRPSKSK-a8-b9	sp|P53552|THO2_YEAST	sp|P53552|THO2_YEAST	intra-protein xl	aleitner_C1509_099.c.03228.03228.5_aleitner_C1509_099.c.03207.03207.5	1415	1455	40	3744.75	749.959	5	-5.1	0.37	0	23.9
SNTQALPQGPKGGNYVSR-DSPSENEEKPNKR-a11-b9	sp|P53552|THO2_YEAST	sp|P53552|THO2_YEAST	intra-protein xl	aleitner_C1509_099.c.03610.03610.4_aleitner_C1509_099.c.03580.03580.4	1587	1533	54	3539.71	885.936	4	-3.7	0.18	0.61	23.82
SEQTQPKGEISEENTK-KLQDAR-a7-b1	sp|P17629|HPR1_YEAST	sp|P17629|HPR1_YEAST	intra-protein xl	aleitner_C1509_099.c.02835.02835.4_aleitner_C1509_099.c.02831.02831.4	690	635	55	2671.32	668.837	4	-5.1	0.35	0	23.79
INSASQTEGDELKSEQTQPK-ALEEEASFPEREQKIK-a13-b14	sp|P17629|HPR1_YEAST	sp|P17629|HPR1_YEAST	intra-protein xl	aleitner_C1509_097.c.04948.04948.4_aleitner_C1509_097.c.04904.04904.4	683	665	18	4230.07	1058.53	4	-2.9	0.21	0	23.56
SELPTRPSKSK-LREEYKK-a9-b6	sp|P53552|THO2_YEAST	sp|P53552|THO2_YEAST	intra-protein xl	aleitner_C1509_098.c.02418.02418.4_aleitner_C1509_098.c.02396.02396.4	1455	1489	34	2331.27	583.826	4	-3.8	0.25	0	23.44
LNNYNYGGCDLDISYAKR-KFTENVVGGGER-a17-b1	sp|P38922|HRB1_YEAST	sp|P38922|HRB1_YEAST	intra-protein xl	aleitner_C1509_093.c.10796.10796.4_aleitner_C1509_093.c.10736.10736.4	452	363	89	3564.68	892.179	4	-3	0.32	0	23.38
TLLEAIDAIEQPSRPTDKPLR-ETKAGVVK-a18-b3	sp|P02994|EF1A_YEAST	sp|P02994|EF1A_YEAST	intra-protein xl	aleitner_C1509_097.c.08477.08477.5_aleitner_C1509_097.c.08447.08447.5	242	217	25	3330.83	667.174	5	-2.5	0.27	0.41	23.27
SELPTRPSKSK-NKFQTQDYR-a9-b2	sp|P53552|THO2_YEAST	sp|P53552|THO2_YEAST	intra-protein xl	aleitner_C1509_098.c.04073.04073.4_aleitner_C1509_098.c.04021.04021.4	1455	1547	92	2565.3	642.334	4	-6	0.28	0	23.21
KSNTQALPQGPKGGNYVSR-DSPSENEEKPNKR-a12-b9	sp|P53552|THO2_YEAST	sp|P53552|THO2_YEAST	intra-protein xl	aleitner_C1509_097.c.02608.02608.5_aleitner_C1509_097.c.02570.02570.5	1587	1533	54	3667.8	734.568	5	-4.5	0.34	0.45	23.2
LQNDPPKSVASGSAGLNSK-QLELNKSQR-a7-b6	sp|P53552|THO2_YEAST	sp|P53552|THO2_YEAST	intra-protein xl	aleitner_C1509_098.c.05414.05414.4_aleitner_C1509_098.c.05454.05454.4	1260	1250	10	3121.62	781.413	4	-5.4	0.25	0	23.13
LKDALELDEFCTLTEEEAEQK-LQNDPPKSVASGSAGLNSK-a2-b7	sp|P53552|THO2_YEAST	sp|P53552|THO2_YEAST	intra-protein xl	aleitner_C1509_096.c.09613.09613.4_aleitner_C1509_096.c.09620.09620.4	1197	1260	63	4517.18	1130.3	4	-5	0.24	0	23.04
DSPSENEEKPNKR-NKFQTQDYR-a9-b2	sp|P53552|THO2_YEAST	sp|P53552|THO2_YEAST	intra-protein xl	aleitner_C1509_099.c.03193.03193.5_aleitner_C1509_099.c.03161.03161.5	1533	1547	14	2865.34	574.076	5	-3.7	0.45	0	22.62
LTGSIINGTLSNDDSKIEK-YLDILGKVTK-a16-b7	sp|P33441|MFT1_YEAST	sp|P33441|MFT1_YEAST	intra-protein xl	aleitner_C1509_096.c.10243.10243.4_aleitner_C1509_096.c.10228.10228.4	52	33	19	3290.78	823.702	4	-2.8	0.28	0	22.41
QDNPPPSNNIKER-KALDRGELR-a11-b1	sp|P38922|HRB1_YEAST	sp|P38922|HRB1_YEAST	intra-protein xl	aleitner_C1509_094.c.04066.04066.4_aleitner_C1509_094.c.04043.04043.4	244	247	3	2702.39	676.606	4	-6.9	0.61	0.92	22.38
VNEKTGVDGLFEEPR-KVEALDDSFKEK-a4-b10	sp|P17629|HPR1_YEAST	sp|P17629|HPR1_YEAST	intra-protein xl	aleitner_C1509_099.c.08679.08679.4_aleitner_C1509_099.c.08655.08655.4	600	621	21	3234.62	809.662	4	-3.6	0.29	0	22.35
ALEEEASFPEREQKIK-SEQTQPKGEISEENTK-a14-b7	sp|P17629|HPR1_YEAST	sp|P17629|HPR1_YEAST	intra-protein xl	aleitner_C1509_097.c.04442.04442.4_aleitner_C1509_097.c.04431.04431.4	665	690	25	3844.87	962.226	4	-2.9	0.54	0	22.32
ISEETNADIESKGK-VSFNKAER-a12-b5	sp|P53552|THO2_YEAST	sp|P53552|THO2_YEAST	intra-protein xl	aleitner_C1509_098.c.05004.05004.4_aleitner_C1509_098.c.04971.04971.4	390	634	244	2607.29	652.831	4	-4.3	0.21	0	22.26
YSGNAGGKDGYGSSNYRGPSNDR-SKTYNDR-a8-b2	sp|P53552|THO2_YEAST	sp|P53552|THO2_YEAST	intra-protein xl	aleitner_C1509_098.c.02826.02826.5_aleitner_C1509_098.c.02784.02784.5	1415	1457	42	3398.49	680.707	5	-6.1	0.31	0	22.11
ELGTDLVKFLIEK-LVDPGLKK-a8-b7	sp|P33441|MFT1_YEAST	sp|P33441|MFT1_YEAST	intra-protein xl	aleitner_C1509_098.c.13537.13537.4_aleitner_C1509_098.c.13497.13497.4	165	181	16	2510.46	628.623	4	-0.5	0.25	0	21.89
DSSKANPYQASSYKR-SQLRFPEKPFQEGK-a4-b8	sp|P53552|THO2_YEAST	sp|P53552|THO2_YEAST	intra-protein xl	aleitner_C1509_098.c.06669.06669.5_aleitner_C1509_098.c.06558.06558.5	1513	1503	10	3528.74	706.756	5	-5.9	0.31	0.55	21.89
SVASGSAGLNSKDR-QLELNKSQR-a12-b6	sp|P53552|THO2_YEAST	sp|P53552|THO2_YEAST	intra-protein xl	aleitner_C1509_099.c.04590.04590.4_aleitner_C1509_099.c.04535.04535.4	1272	1250	22	2600.34	651.093	4	-4.4	0.28	0	21.74
IPTGLDKIEQEVK-KPEGVYEAAQAK-a7-b1	sp|P17629|HPR1_YEAST	sp|P17629|HPR1_YEAST	intra-protein xl	aleitner_C1509_099.c.08749.08749.4_aleitner_C1509_099.c.08712.08712.4	540	547	7	2896.53	725.139	4	-5.8	0.29	0.94	21.58
SAPKNIKPISSYAHK-KNSSQR-a4-b1	sp|P53552|THO2_YEAST	sp|P53552|THO2_YEAST	intra-protein xl	aleitner_C1509_098.c.02255.02255.5_aleitner_C1509_098.c.02225.02225.5	1434	1490	56	2496.33	500.274	5	-5.3	0.27	0	21.41
IPTGLDKIEQEVK-KKLQDAR-a7-b2	sp|P17629|HPR1_YEAST	sp|P17629|HPR1_YEAST	intra-protein xl	aleitner_C1509_099.c.05238.05238.5_aleitner_C1509_099.c.05953.05953.5	540	635	95	2464.39	493.885	5	-1.6	0.11	0	21.25
RDSPSENEEKPNK-ANPYQASSYKR-a10-b10	sp|P53552|THO2_YEAST	sp|P53552|THO2_YEAST	intra-protein xl	aleitner_C1509_094.c.03160.03160.4_aleitner_C1509_094.c.03273.03273.4	1533	1523	10	2950.39	738.605	4	-5.4	0.73	0	21.07
LKDALELDEFCTLTEEEAEQKR-LQNDPPKSVASGSAGLNSK-a2-b7	sp|P53552|THO2_YEAST	sp|P53552|THO2_YEAST	intra-protein xl	aleitner_C1509_096.c.08923.08923.5_aleitner_C1509_096.c.08891.08891.5	1197	1260	63	4673.3	935.668	5	-0.4	0.47	0	21.01
ALEEEASFPEREQKIK-GEISEENTKIK-a14-b9	sp|P17629|HPR1_YEAST	sp|P17629|HPR1_YEAST	intra-protein xl	aleitner_C1509_099.c.05808.05808.4_aleitner_C1509_099.c.05776.05776.4	665	699	34	3287.66	822.922	4	-5.9	0.17	0.55	20.92
NYETACQNEQKQVALR-KSNTQALPQGPK-a11-b1	sp|P53552|THO2_YEAST	sp|P53552|THO2_YEAST	intra-protein xl	aleitner_C1509_099.c.04741.04741.4_aleitner_C1509_099.c.04713.04713.4	1238	1576	338	3356.66	840.174	4	-4.6	0.25	0	20.84
KSNTQALPQGPK-FKKDETIR-a1-b2	sp|P53552|THO2_YEAST	sp|P53552|THO2_YEAST	intra-protein xl	aleitner_C1509_099.c.02923.02923.4_aleitner_C1509_099.c.03555.03555.4	1576	1539	37	2441.31	611.335	4	-8.5	0.27	0	20.84
ENPLSDIDFENLDEVNKKR-NFYKSCYLR-a17-b4	sp|P17629|HPR1_YEAST	sp|P17629|HPR1_YEAST	intra-protein xl	aleitner_C1509_099.c.11173.11173.5_aleitner_C1509_099.c.11163.11163.5	445	423	22	3661.75	733.358	5	-6.2	0.14	0.8	20.71
TLIQNPQNPDFAEKIDSLKR-YIKNISR-a14-b3	sp|P53552|THO2_YEAST	sp|P53552|THO2_YEAST	intra-protein xl	aleitner_C1509_098.c.09578.09578.5_aleitner_C1509_098.c.09534.09534.5	1370	1379	9	3356.79	672.367	5	-4.5	0.21	0.48	20.66
QDNPPPSNNIKER-KTHEVIVK-a11-b1	sp|P38922|HRB1_YEAST	sp|P38922|HRB1_YEAST	intra-protein xl	aleitner_C1509_098.c.02695.02695.4_aleitner_C1509_098.c.02829.02829.4	244	259	15	2598.36	650.598	4	-5.7	0.11	0.8	20.62
SNTQALPQGPKGGNYVSR-NKFQTQDYR-a11-b2	sp|P53552|THO2_YEAST	sp|P53552|THO2_YEAST	intra-protein xl	aleitner_C1509_094.c.07247.07247.4_aleitner_C1509_094.c.07178.07178.4	1587	1547	40	3209.57	803.4	4	-5.2	0.15	0	20.6
QDNPPPSNNIKER-ELDSTYEEKVNR-a11-b9	sp|P38922|HRB1_YEAST	sp|P38922|HRB1_YEAST	intra-protein xl	aleitner_C1509_099.c.05198.05198.4_aleitner_C1509_099.c.05162.05162.4	244	154	90	3127.5	782.882	4	-3.1	0.22	0	20.58
YSGNAGGKDGYGSSNYRGPSNDR-NKFQTQDYR-a8-b2	sp|P53552|THO2_YEAST	sp|P53552|THO2_YEAST	intra-protein xl	aleitner_C1509_098.c.04435.04435.5_aleitner_C1509_098.c.04410.04410.5	1415	1547	132	3714.65	743.937	5	-6	0.32	0	20.36
DSSKANPYQASSYKR-DSPSENEEKPNKR-a4-b12	sp|P53552|THO2_YEAST	sp|P53552|THO2_YEAST	intra-protein xl	aleitner_C1509_099.c.02600.02600.4_aleitner_C1509_099.c.02562.02562.4	1513	1536	23	3367.58	842.903	4	-3.1	0.19	0	20.28
ANPYQASSYKR-NKFQTQDYR-a10-b2	sp|P53552|THO2_YEAST	sp|P53552|THO2_YEAST	intra-protein xl	aleitner_C1509_093.c.06606.06606.3_aleitner_C1509_093.c.06571.06571.3	1523	1547	24	2620.26	874.427	3	-3.5	0.49	0	19.67
LSTLTKELNHWR-SSDDLLTESLKK-a6-b11	sp|O13539|THP2_YEAST	sp|O13539|THP2_YEAST	intra-protein xl	aleitner_C1509_093.c.12333.12333.4_aleitner_C1509_093.c.12291.12291.4	205	52	153	2969.56	743.399	4	-2.3	0.42	0.67	19.61
DSPSENEEKPNKR-ANPYQASSYKR-a12-b10	sp|P53552|THO2_YEAST	sp|P53552|THO2_YEAST	intra-protein xl	aleitner_C1509_098.c.02825.02825.5_aleitner_C1509_098.c.02764.02764.5	1536	1523	13	2950.39	591.085	5	-6.8	0.57	0	19.36
DVAAGVQNPKSISEYYSTFEHLNR-IDSLKSEINAPSESYPVDK-a10-b5	sp|O13539|THP2_YEAST	sp|O13539|THP2_YEAST	intra-protein xl	aleitner_C1509_096.c.10456.10456.5_aleitner_C1509_096.c.10434.10434.5	98	240	142	4953.4	991.688	5	-4	0.19	0	19.22
NYETACQNEQKQVALRK-ISEETNADIESKGKQK-a11-b12	sp|P53552|THO2_YEAST	sp|P53552|THO2_YEAST	intra-protein xl	aleitner_C1509_097.c.05390.05390.4_aleitner_C1509_097.c.05364.05364.4	1238	390	848	3992.94	999.243	4	-8.4	0.34	0	19.2
FAKLISTNPLASLVPAVK-ALSIDTIAKESR-a3-b9	sp|P53552|THO2_YEAST	sp|P53552|THO2_YEAST	intra-protein xl	aleitner_C1509_096.c.12086.12086.4_aleitner_C1509_096.c.12080.12080.4	660	653	7	3308.89	828.231	4	-1.4	0.28	0	19.15
NANDNNQFYQQKQR-AIEQLNYTPIKGR-a12-b11	sp|P04147|PABP_YEAST	sp|P04147|PABP_YEAST	intra-protein xl	aleitner_C1509_094.c.08670.08670.4_aleitner_C1509_094.c.08604.08604.4	504	105	399	3406.68	852.679	4	-5.5	0.16	0	19
IGKLQGLYDSVQVINR-QEVSSYKEK-a3-b7	sp|P33441|MFT1_YEAST	sp|P33441|MFT1_YEAST	intra-protein xl	aleitner_C1509_099.c.10076.10076.4_aleitner_C1509_099.c.10038.10038.4	123	224	101	3036.59	760.157	4	-5.9	0.26	0	18.85
SNTQALPQGPKGGNYVSR-DSPSENEEKPNKR-a11-b12	sp|P53552|THO2_YEAST	sp|P53552|THO2_YEAST	intra-protein xl	aleitner_C1509_099.c.03623.03623.5_aleitner_C1509_099.c.03568.03568.5	1587	1536	51	3539.7	708.949	5	-5.4	0.43	0	18.54
GVDAQIKNYLDQIK-SSDDLLTESLKK-a7-b11	sp|O13539|THP2_YEAST	sp|O13539|THP2_YEAST	intra-protein xl	aleitner_C1509_098.c.13015.13015.4_aleitner_C1509_098.c.13009.13009.4	175	52	123	3076.6	770.157	4	-6.4	0.15	0	18.5
KSNTQALPQGPK-ANPYQASSYKR-a1-b10	sp|P53552|THO2_YEAST	sp|P53552|THO2_YEAST	intra-protein xl	aleitner_C1509_098.c.04135.04135.4_aleitner_C1509_098.c.04076.04076.4	1576	1523	53	2689.36	673.348	4	-8.6	0.36	0	18.25
NEPVIPTKPSSSQWSYSK-NYETACQNEQKQVALR-a8-b11	sp|P53552|THO2_YEAST	sp|P53552|THO2_YEAST	intra-protein xl	aleitner_C1509_099.c.08078.08078.4_aleitner_C1509_099.c.08010.08010.4	1287	1238	49	4122.98	1031.75	4	-2.5	0.25	0	18.19
IPTGLDKIEQEVKKPEGVYEAAQAK-ISSETSGGEAKDEIIR-a13-b11	sp|P17629|HPR1_YEAST	sp|P17629|HPR1_YEAST	intra-protein xl	aleitner_C1509_096.c.08646.08646.5_aleitner_C1509_096.c.08527.08527.5	546	573	27	4569.34	914.875	5	-7.2	0.18	0	17.99
KNALSGENTGHMSNR-KKHLIQNQIK-a1-b2	sp|P53552|THO2_YEAST	sp|P53552|THO2_YEAST	intra-protein xl	aleitner_C1509_099.c.02715.02715.5_aleitner_C1509_099.c.02694.02694.5	967	983	16	3001.56	601.32	5	-8.6	0.13	0	17.94
LKDALELDEFCTLTEEEAEQKR-NYETACQNEQKQVALR-a2-b11	sp|P53552|THO2_YEAST	sp|P53552|THO2_YEAST	intra-protein xl	aleitner_C1509_097.c.09370.09370.5_aleitner_C1509_097.c.09338.09338.5	1197	1238	41	4755.24	952.056	5	-5.3	0.13	0	17.92
KSNTQALPQGPK-SELPTRPSKSK-a1-b9	sp|P53552|THO2_YEAST	sp|P53552|THO2_YEAST	intra-protein xl	aleitner_C1509_099.c.03063.03063.5_aleitner_C1509_099.c.03041.03041.5	1576	1455	121	2634.42	527.891	5	-6.7	0.15	0	17.08
IPPPAFDETFKKFTFIK-VLKFYKIK-a11-b6	sp|P17629|HPR1_YEAST	sp|P17629|HPR1_YEAST	intra-protein xl	aleitner_C1509_097.c.13552.13552.5_aleitner_C1509_097.c.13530.13530.5	516	465	51	3200.81	641.17	5	-5.8	0.1	0	16.86
IPTGLDKIEQEVKKPEGVYEAAQAK-ISSETSGGEAKDEIIR-a7-b11	sp|P17629|HPR1_YEAST	sp|P17629|HPR1_YEAST	intra-protein xl	aleitner_C1509_094.c.12413.12413.5_aleitner_C1509_094.c.12392.12392.5	540	573	33	4569.35	914.879	5	-3.4	0.16	0.66	16.68
DSPSENEEKPNKR-FKKDETIR-a9-b2	sp|P53552|THO2_YEAST	sp|P53552|THO2_YEAST	intra-protein xl	aleitner_C1509_093.c.02699.02699.6_aleitner_C1509_093.c.02639.02639.6	1533	1539	6	2702.34	451.397	6	-5.8	0.19	0.88	16.35
LKDALELDEFCTLTEEEAEQKR-KQLELNK-a21-b1	sp|P53552|THO2_YEAST	sp|P53552|THO2_YEAST	intra-protein xl	aleitner_C1509_096.c.09220.09220.4_aleitner_C1509_096.c.09197.09197.4	1216	1244	28	3675.84	919.967	4	-4.6	0.12	0	16.3

## Sheet: 0.5 mM BS3 Lumos
0.5 mM DSS cross-links low-resolution MS/MS OT Lumos
Inter-subunit cross-links
Id	Protein1	Protein2	XLType	Spectrum	AbsPos1	AbsPos2	deltaAA	Mr	Mz	z	Error_rel[ppm]	TIC	deltaS	ld-Score
TKVHYSEVDTPFNK-HLLKK-a2-b4	sp|P33441|MFT1_YEAST	sp|P53552|THO2_YEAST	inter-protein xl	aleitner_D1609_244.c.12478.12478.3_aleitner_D1609_244.c.12112.12112.3	14	163		2439.32	814.113	3	0.3	0.25	0	33.23
ISSETSGGEAKDEIIR-ANTQNSHYKILSTR-a11-b9	sp|P17629|HPR1_YEAST	sp|P53552|THO2_YEAST	inter-protein xl	aleitner_D1609_244.c.17266.17266.5_aleitner_D1609_244.c.17136.17136.5	573	853		3460.74	693.156	5	-0.8	0.27	0.6	31.79
GPKELESINASMK-AKFGLENK-a3-b2	sp|P33441|MFT1_YEAST	sp|O13539|THP2_YEAST	inter-protein xl	aleitner_D1609_243.c.23215.23215.3_aleitner_D1609_243.c.23009.23009.3	200	187		2446.28	816.433	3	-0.6	0.35	0.18	31.77
LPVYMKHSNAMK-LIHKYK-a6-b4	sp|P17629|HPR1_YEAST	sp|P53552|THO2_YEAST	inter-protein xl	aleitner_D1609_244.c.10146.10146.3_aleitner_D1609_244.c.10083.10083.3	340	488		2356.28	786.434	3	-0.7	0.28	0	31.53
TKVHYSEVDTPFNK-YDKYQTR-a2-b3	sp|P33441|MFT1_YEAST	sp|O13539|THP2_YEAST	inter-protein xl	aleitner_D1609_243.c.15695.15695.4_aleitner_D1609_243.c.15539.15539.4	14	72		2774.35	694.596	4	-0.5	0.33	0.2	30.43
AEWEKELGTDLVK-AKFGLENK-a5-b2	sp|P33441|MFT1_YEAST	sp|O13539|THP2_YEAST	inter-protein xl	aleitner_D1609_244.c.30254.30254.3_aleitner_D1609_244.c.30108.30108.3	157	187		2560.34	854.455	3	-0.5	0.28	0	27.93
EAQLLEDTKTGR-FLDLQSSIDTKK-a9-b11	sp|O13539|THP2_YEAST	sp|P33441|MFT1_YEAST	inter-protein xl	aleitner_D1609_243.c.28664.28664.3_aleitner_D1609_243.c.28486.28486.3	85	82		2891.51	964.845	3	-0.8	0.18	0	27.65
GVDAQIKNYLDQIK-KDSSEER-a7-b1	sp|O13539|THP2_YEAST	sp|P33441|MFT1_YEAST	inter-protein xl	aleitner_D1609_244.c.29308.29308.4_aleitner_D1609_244.c.29256.29256.4	175	182		2591.3	648.834	4	-1.3	0.24	0.31	27.5
DKISEETNADIESKGK-TSKNTDR-a14-b3	sp|P53552|THO2_YEAST	sp|P53851|TEX1_YEAST	inter-protein xl	aleitner_D1609_244.c.08053.08053.4_aleitner_D1609_244.c.07922.07922.4	390	405		2721.33	681.34	4	-0.5	0.19	0	27.41
TKVHYSEVDTPFNK-YINLLKR-a2-b6	sp|P33441|MFT1_YEAST	sp|O13539|THP2_YEAST	inter-protein xl	aleitner_D1609_243.c.24080.24080.5_aleitner_D1609_243.c.23821.23821.5	14	122		2720.45	545.098	5	-1.4	0.22	0.5	27.02
TKVHYSEVDTPFNK-LRYDKYQTR-a2-b5	sp|P33441|MFT1_YEAST	sp|O13539|THP2_YEAST	inter-protein xl	aleitner_D1609_244.c.15785.15785.6_aleitner_D1609_244.c.15646.15646.6	14	72		3043.54	508.264	6	-0.9	0.15	0.76	26.85
SDIENVRQEVSSYKEK-YINLLKR-a14-b6	sp|P33441|MFT1_YEAST	sp|O13539|THP2_YEAST	inter-protein xl	aleitner_D1609_243.c.28192.28192.4_aleitner_D1609_243.c.28409.28409.4	224	122		2966.57	742.65	4	-0.5	0.15	0.6	26.79
NKDTAPHIVVATPGR-NYLKLVDPGLKK-a2-b4	sp|Q07478|SUB2_YEAST	sp|P33441|MFT1_YEAST	inter-protein xl	aleitner_D1609_241.c.13968.13968.5_aleitner_D1609_241.c.13911.13911.5	181	174		3099.74	620.955	5	-2.1	0.3	0.39	26.58
GVDAQIKNYLDQIK-LVDPGLKK-a7-b7	sp|O13539|THP2_YEAST	sp|P33441|MFT1_YEAST	inter-protein xl	aleitner_D1609_244.c.34540.34540.3_aleitner_D1609_244.c.34448.34448.3	175	181		2610.46	871.161	3	-1	0.19	0	26.28
ITSIFKEELLK-KMIQK-a6-b1	sp|P33441|MFT1_YEAST	sp|O13539|THP2_YEAST	inter-protein xl	aleitner_D1609_243.c.26009.26009.4_aleitner_D1609_243.c.25888.25888.4	242	231		2104.22	527.063	4	-0.2	0.11	0	26.24
FGLENKYSLK-IYDDFSKGPK-a6-b7	sp|O13539|THP2_YEAST	sp|P33441|MFT1_YEAST	inter-protein xl	aleitner_D1609_244.c.27519.27519.3_aleitner_D1609_244.c.27345.27345.3	193	197		2504.28	835.768	3	-0.9	0.2	0	25.68
KNALSGENTGHMSNR-FLIEKNYLK-a1-b5	sp|P53552|THO2_YEAST	sp|P33441|MFT1_YEAST	inter-protein xl	aleitner_D1609_243.c.19486.19486.4_aleitner_D1609_243.c.19293.19293.4	967	170		2919.49	730.88	4	-0.5	0.34	0	25.61
NYLKLVDPGLKK-FGLENKYSLK-a4-b6	sp|P33441|MFT1_YEAST	sp|O13539|THP2_YEAST	inter-protein xl	aleitner_D1609_244.c.29000.29000.5_aleitner_D1609_244.c.28827.28827.5	174	193		2722.53	545.514	5	-0.3	0.3	0.57	25.49
SGYLAILKAK-KFADTYR-a8-b1	sp|P53851|TEX1_YEAST	sp|P38922|HRB1_YEAST	inter-protein xl	aleitner_D1609_243.c.22041.22041.4_aleitner_D1609_243.c.21837.21837.4	237	50		2100.16	526.049	4	1.6	0.33	0	25.34
NYETACQNEQKQVALR-IGKDRPSR-a11-b3	sp|P53552|THO2_YEAST	sp|P53851|TEX1_YEAST	inter-protein xl	aleitner_D1609_243.c.09832.09832.5_aleitner_D1609_243.c.09747.09747.5	1238	412		3016.51	604.311	5	0	0.24	0.41	24.65
IDSLKSEINAPSESYPVDK-ITSIFKEELLK-a5-b6	sp|O13539|THP2_YEAST	sp|P33441|MFT1_YEAST	inter-protein xl	aleitner_D1609_243.c.36840.36840.4_aleitner_D1609_243.c.36730.36730.4	240	242		3548.88	888.227	4	0.5	0.21	0.36	24.47
YSGNAGGKDGYGSSNYRGPSNDR-IGKDRPSR-a8-b3	sp|P53552|THO2_YEAST	sp|P53851|TEX1_YEAST	inter-protein xl	aleitner_D1609_243.c.05962.05962.5_aleitner_D1609_243.c.05822.05822.5	1415	412		3443.62	689.731	5	-0.8	0.4	0.32	24.31
KKHLIQNQIK-YSLKER-a1-b4	sp|P53552|THO2_YEAST	sp|O13539|THP2_YEAST	inter-protein xl	aleitner_D1609_243.c.08095.08095.5_aleitner_D1609_243.c.08040.08040.5	982	197		2181.26	437.259	5	-2.7	0.31	0.63	24.26
SNTQALPQGPKGGNYVSR-IGKDRPSR-a11-b3	sp|P53552|THO2_YEAST	sp|P53851|TEX1_YEAST	inter-protein xl	aleitner_D1609_244.c.09681.09681.4_aleitner_D1609_244.c.09585.09585.4	1587	412		2938.54	735.642	4	0.4	0.15	0	24.19
NYLKLVDPGLK-FGLENKYSLK-a4-b6	sp|P33441|MFT1_YEAST	sp|O13539|THP2_YEAST	inter-protein xl	aleitner_D1609_243.c.34492.34492.4_aleitner_D1609_243.c.34424.34424.4	174	193		2594.43	649.616	4	-1.3	0.28	0.56	23.91
AKFGLENKYSLK-NYLKLVDPGLK-a2-b4	sp|O13539|THP2_YEAST	sp|P33441|MFT1_YEAST	inter-protein xl	aleitner_D1609_244.c.29839.29839.4_aleitner_D1609_244.c.29718.29718.4	187	174		2793.57	699.399	4	-0.5	0.42	0	23.89
SELPTRPSKSK-TSKNTDR-a9-b3	sp|P53552|THO2_YEAST	sp|P53851|TEX1_YEAST	inter-protein xl	aleitner_D1609_243.c.03402.03402.4_aleitner_D1609_243.c.03370.03370.4	1455	405		2187.15	547.796	4	0.9	0.12	0	23.86
ITSIFKEELLKR-KMIQK-a6-b1	sp|P33441|MFT1_YEAST	sp|O13539|THP2_YEAST	inter-protein xl	aleitner_D1609_243.c.22061.22061.5_aleitner_D1609_243.c.21902.21902.5	242	231		2260.32	453.072	5	-0.9	0.11	0.45	23.64
GPKELESINASMK-IDNGILAHKPR-a3-b9	sp|P33441|MFT1_YEAST	sp|P53552|THO2_YEAST	inter-protein xl	aleitner_D1609_243.c.22030.22030.5_aleitner_D1609_243.c.21985.21985.5	200	482		2773.48	555.703	5	-0.7	0.12	0	23.58
SDIENVRQEVSSYKEK-MIQKIDSLK-a14-b4	sp|P33441|MFT1_YEAST	sp|O13539|THP2_YEAST	inter-protein xl	aleitner_D1609_243.c.26556.26556.4_aleitner_D1609_243.c.26412.26412.4	224	235		3122.62	781.662	4	0	0.18	0	23.5
KSNTQALPQGPK-TSKNTDR-a1-b3	sp|P53552|THO2_YEAST	sp|P53851|TEX1_YEAST	inter-protein xl	aleitner_D1609_244.c.04032.04032.4_aleitner_D1609_244.c.03967.03967.4	1576	405		2226.15	557.546	4	-2.9	0.17	0	23.41
NKDTAPHIVVATPGR-NYLKLVDPGLK-a2-b4	sp|Q07478|SUB2_YEAST	sp|P33441|MFT1_YEAST	inter-protein xl	aleitner_D1609_244.c.25451.25451.5_aleitner_D1609_244.c.25405.25405.5	181	174		2971.64	595.336	5	-2.1	0.18	0.76	23.35
IYDDFSKGPK-NYLDQIKMAR-a7-b7	sp|P33441|MFT1_YEAST	sp|O13539|THP2_YEAST	inter-protein xl	aleitner_D1609_243.c.29400.29400.4_aleitner_D1609_243.c.29281.29281.4	197	182		2557.29	640.329	4	-1.2	0.41	0	23.34
GVDAQIKNYLDQIK-IYDDFSKGPK-a7-b7	sp|O13539|THP2_YEAST	sp|P33441|MFT1_YEAST	inter-protein xl	aleitner_D1609_244.c.36346.36346.4_aleitner_D1609_244.c.36269.36269.4	175	197		2910.5	728.633	4	-0.8	0.16	0	23.31
MIQKIDSLK-SIHSKLLLR-a4-b5	sp|O13539|THP2_YEAST	sp|P33441|MFT1_YEAST	inter-protein xl	aleitner_D1609_243.c.23341.23341.4_aleitner_D1609_243.c.23158.23158.4	235	116		2278.34	570.593	4	-2.5	0.13	0	23.18
LPDIKSIHSK-IQKLGRVGR-a5-b3	sp|P33441|MFT1_YEAST	sp|P04517|POLG_TEV	inter-protein xl	aleitner_D1609_243.c.29927.29927.4_aleitner_D1609_243.c.30199.30199.4	111	1514		2300.37	576.1	4	0.1	0.29	0	22.78
GPKELESINASMK-NYLDQIKMAR-a3-b7	sp|P33441|MFT1_YEAST	sp|O13539|THP2_YEAST	inter-protein xl	aleitner_D1609_244.c.29587.29587.4_aleitner_D1609_244.c.29584.29584.4	200	182		2791.43	698.865	4	1.4	0.19	0	22.68
INSASQTEGDELKSEQTQPK-LQNDPPKSVASGSAGLNSK-a13-b7	sp|P17629|HPR1_YEAST	sp|P53552|THO2_YEAST	inter-protein xl	aleitner_D1609_242.c.09886.09886.4_aleitner_D1609_242.c.09722.09722.4	683	1260		4196.08	1050.03	4	1.2	0.23	0	22.64
NYETACQNEQKQVALR-GEISEENTKIK-a11-b9	sp|P53552|THO2_YEAST	sp|P17629|HPR1_YEAST	inter-protein xl	aleitner_D1609_243.c.15817.15817.4_aleitner_D1609_243.c.15814.15814.4	1238	699		3335.64	834.917	4	1.4	0.25	0	22.62
ISEETNADIESKGK-TSKNTDR-a12-b3	sp|P53552|THO2_YEAST	sp|P53851|TEX1_YEAST	inter-protein xl	aleitner_D1609_244.c.06306.06306.4_aleitner_D1609_244.c.06283.06283.4	390	405		2478.21	620.56	4	0	0.16	0	22.47
ALEEEASFPEREQKIK-KQLELNK-a14-b1	sp|P17629|HPR1_YEAST	sp|P53552|THO2_YEAST	inter-protein xl	aleitner_D1609_243.c.17593.17593.5_aleitner_D1609_243.c.17498.17498.5	665	1244		2912.55	583.517	5	-0.7	0.25	0.52	22.26
FDELLEKNDRR-LIHKYK-a7-b4	sp|P02994|EF1A_YEAST	sp|P53552|THO2_YEAST	inter-protein xl	aleitner_D1609_244.c.08669.08669.5_aleitner_D1609_244.c.08090.08090.5	376	488		2372.28	475.463	5	-3.7	0.24	0.78	22.21
Intra-subunit cross-links
Id	Protein1	Protein2	XLType	Spectrum	AbsPos1	AbsPos2	deltaAA	Mr	Mz	z	Error_rel[ppm]	TIC	deltaS	ld-Score
SIHSKLLLR-DKLPDIK-a5-b2	sp|P33441|MFT1_YEAST	sp|P33441|MFT1_YEAST	intra-protein xl	aleitner_D1609_244.c.22386.22386.5_aleitner_D1609_244.c.22295.22295.5	116	106	10	2031.2	407.249	5	-2.6	0.65	0	35.79
ISSETSGGEAKDEIIR-VNEKTGVDGLFEEPR-a11-b4	sp|P17629|HPR1_YEAST	sp|P17629|HPR1_YEAST	intra-protein xl	aleitner_D1609_244.c.27780.27780.4_aleitner_D1609_244.c.28044.28044.4	573	600	27	3517.74	880.443	4	-0.5	0.4	0.31	33.63
KTHEVIVK-KALDR-a1-b1	sp|P38922|HRB1_YEAST	sp|P38922|HRB1_YEAST	intra-protein xl	aleitner_D1609_244.c.04172.04172.4_aleitner_D1609_244.c.04097.04097.4	259	247	12	1691.99	424.006	4	-0.4	0.33	0	32.74
KVEALDDSFK-LLYKINQEHR-a1-b4	sp|P17629|HPR1_YEAST	sp|P17629|HPR1_YEAST	intra-protein xl	aleitner_D1609_244.c.19026.19026.3_aleitner_D1609_244.c.18886.18886.3	612	627	15	2601.38	868.133	3	-1.7	0.45	0	32.49
LPDIKSIHSK-LENLKDK-a5-b5	sp|P33441|MFT1_YEAST	sp|P33441|MFT1_YEAST	intra-protein xl	aleitner_D1609_243.c.15559.15559.5_aleitner_D1609_243.c.15140.15140.5	111	104	7	2133.2	427.648	5	-1.4	0.27	0.67	32.31
GVDAQIKNYLDQIK-AKFGLENK-a7-b2	sp|O13539|THP2_YEAST	sp|O13539|THP2_YEAST	intra-protein xl	aleitner_D1609_243.c.36456.36456.4_aleitner_D1609_243.c.36297.36297.4	175	187	12	2647.42	662.863	4	0.2	0.26	0.58	32.27
NYLKLVDPGLK-IYDDFSKGPK-a4-b7	sp|P33441|MFT1_YEAST	sp|P33441|MFT1_YEAST	intra-protein xl	aleitner_D1609_243.c.30684.30684.3_aleitner_D1609_243.c.30513.30513.3	174	197	23	2565.37	856.131	3	-1.3	0.53	0	32.25
EKYIDLSHVK-LKALVR-a2-b2	sp|Q07478|SUB2_YEAST	sp|Q07478|SUB2_YEAST	intra-protein xl	aleitner_D1609_244.c.19512.19512.4_aleitner_D1609_244.c.19740.19740.4	202	196	6	2067.21	517.81	4	0	0.5	0	32.05
IGKLQGLYDSVQVINR-SIHSKLLLR-a3-b5	sp|P33441|MFT1_YEAST	sp|P33441|MFT1_YEAST	intra-protein xl	aleitner_D1609_244.c.34178.34178.4_aleitner_D1609_244.c.34102.34102.4	123	116	7	3005.73	752.441	4	-1.6	0.34	0.33	30.85
TKVHYSEVDTPFNK-FLDLQSSIDTKK-a2-b11	sp|P33441|MFT1_YEAST	sp|P33441|MFT1_YEAST	intra-protein xl	aleitner_D1609_244.c.26169.26169.5_aleitner_D1609_244.c.26039.26039.5	14	82	68	3195.63	640.134	5	-1.3	0.25	0.45	30.33
FLIEKNYLK-LVDPGLKK-a5-b7	sp|P33441|MFT1_YEAST	sp|P33441|MFT1_YEAST	intra-protein xl	aleitner_D1609_243.c.27478.27478.4_aleitner_D1609_243.c.27257.27257.4	170	181	11	2173.28	544.327	4	-0.6	0.45	0	30.32
LENLKDKLPDIK-SIHSKLLLR-a5-b5	sp|P33441|MFT1_YEAST	sp|P33441|MFT1_YEAST	intra-protein xl	aleitner_D1609_243.c.25575.25575.5_aleitner_D1609_243.c.25427.25427.5	104	116	12	2628.55	526.719	5	-1.6	0.22	0.8	30.3
KVEALDDSFKEK-LLYKINQEHRK-a10-b4	sp|P17629|HPR1_YEAST	sp|P17629|HPR1_YEAST	intra-protein xl	aleitner_D1609_242.c.08503.08503.5_aleitner_D1609_242.c.08349.08349.5	621	627	6	2986.6	598.329	5	-3	0.38	0.41	30.19
LQNDPPKSVASGSAGLNSK-KQLELNK-a7-b1	sp|P53552|THO2_YEAST	sp|P53552|THO2_YEAST	intra-protein xl	aleitner_D1609_244.c.14972.14972.4_aleitner_D1609_244.c.14921.14921.4	1260	1244	16	2878.54	720.643	4	-0.3	0.4	0.47	30.08
VNEKTGVDGLFEEPR-KVEALDDSFK-a4-b1	sp|P17629|HPR1_YEAST	sp|P17629|HPR1_YEAST	intra-protein xl	aleitner_D1609_243.c.29113.29113.4_aleitner_D1609_243.c.29002.29002.4	600	612	12	2977.49	745.381	4	0	0.41	0	30.02
FGLENKYSLK-NYLDQIKMAR-a6-b7	sp|O13539|THP2_YEAST	sp|O13539|THP2_YEAST	intra-protein xl	aleitner_D1609_244.c.33135.33135.4_aleitner_D1609_244.c.33004.33004.4	193	182	11	2586.35	647.595	4	-1.3	0.19	0.39	29.37
NYLKLVDPGLKK-IYDDFSKGPK-a4-b7	sp|P33441|MFT1_YEAST	sp|P33441|MFT1_YEAST	intra-protein xl	aleitner_D1609_243.c.25326.25326.5_aleitner_D1609_243.c.25180.25180.5	174	197	23	2693.47	539.702	5	0.2	0.42	0.48	29.2
NYLKLVDPGLK-KDSSEER-a4-b1	sp|P33441|MFT1_YEAST	sp|P33441|MFT1_YEAST	intra-protein xl	aleitner_D1609_244.c.20406.20406.3_aleitner_D1609_244.c.20237.20237.3	174	182	8	2246.18	749.734	3	-0.4	0.27	0	29.1
ISSETSGGEAKDEIIR-KPEGVYEAAQAK-a11-b1	sp|P17629|HPR1_YEAST	sp|P17629|HPR1_YEAST	intra-protein xl	aleitner_D1609_244.c.17729.17729.4_aleitner_D1609_244.c.17749.17749.4	573	547	26	3118.57	780.649	4	-0.4	0.23	0	29.08
GPKELESINASMK-NYLKLVDPGLKK-a3-b4	sp|P33441|MFT1_YEAST	sp|P33441|MFT1_YEAST	intra-protein xl	aleitner_D1609_244.c.25701.25701.4_aleitner_D1609_244.c.25593.25593.4	200	174	26	2927.61	732.909	4	0.3	0.31	0	28.96
IDNGILAHKPR-LIHKYK-a9-b4	sp|P53552|THO2_YEAST	sp|P53552|THO2_YEAST	intra-protein xl	aleitner_D1609_244.c.11933.11933.5_aleitner_D1609_244.c.11825.11825.5	482	488	6	2171.25	435.258	5	-2.4	0.18	0.58	28.9
IEKLTEQNISQLK-YLDILGKVTK-a3-b7	sp|P33441|MFT1_YEAST	sp|P33441|MFT1_YEAST	intra-protein xl	aleitner_D1609_244.c.34301.34301.4_aleitner_D1609_244.c.34214.34214.4	55	33	22	2829.61	708.41	4	-0.8	0.15	0.42	28.79
TKVHYSEVDTPFNK-YLDILGKVTK-a2-b7	sp|P33441|MFT1_YEAST	sp|P33441|MFT1_YEAST	intra-protein xl	aleitner_D1609_244.c.29488.29488.5_aleitner_D1609_244.c.29345.29345.5	14	33	19	2950.56	591.12	5	-2.3	0.22	0.6	28.77
INSASQTEGDELKSEQTQPK-KLQDAR-a13-b1	sp|P17629|HPR1_YEAST	sp|P17629|HPR1_YEAST	intra-protein xl	aleitner_D1609_244.c.09486.09486.4_aleitner_D1609_244.c.09444.09444.4	683	635	48	3056.52	765.138	4	-1.6	0.28	0.42	28.7
GVDAQIKNYLDQIK-SSDDLLTESLKK-a7-b11	sp|O13539|THP2_YEAST	sp|O13539|THP2_YEAST	intra-protein xl	aleitner_D1609_244.c.39933.39933.4_aleitner_D1609_244.c.39805.39805.4	175	52	123	3076.61	770.161	4	-1.5	0.28	0	28.63
NYETACQNEQKQVALR-KQLELNK-a11-b1	sp|P53552|THO2_YEAST	sp|P53552|THO2_YEAST	intra-protein xl	aleitner_D1609_243.c.16818.16818.3_aleitner_D1609_243.c.16795.16795.3	1238	1244	6	2960.5	987.842	3	0.2	0.27	0	28.32
YLFDFDKVNEK-KVEALDDSFK-a7-b1	sp|P17629|HPR1_YEAST	sp|P17629|HPR1_YEAST	intra-protein xl	aleitner_D1609_243.c.33638.33638.4_aleitner_D1609_243.c.33525.33525.4	596	612	16	2705.34	677.344	4	-1	0.36	0	28.16
VSAKTSNEEAAGK-QALGEQLYKK-a4-b9	sp|P04147|PABP_YEAST	sp|P04147|PABP_YEAST	intra-protein xl	aleitner_D1609_244.c.10616.10616.3_aleitner_D1609_244.c.10545.10545.3	520	515	5	2605.36	869.459	3	-1.9	0.36	0.23	28.08
DSPSENEEKPNKR-LREEYKK-a9-b6	sp|P53552|THO2_YEAST	sp|P53552|THO2_YEAST	intra-protein xl	aleitner_D1609_244.c.03712.03712.4_aleitner_D1609_244.c.03245.03245.4	1533	1489	44	2631.31	658.836	4	0.1	0.19	0.7	27.99
LLYKINQEHRK-KLQDAR-a4-b1	sp|P17629|HPR1_YEAST	sp|P17629|HPR1_YEAST	intra-protein xl	aleitner_D1609_244.c.05601.05601.3_aleitner_D1609_244.c.05493.05493.3	627	635	8	2308.3	770.443	3	1.3	0.29	0	27.85
LSLYDIHFDKSLYDER-KNALSGENTGHMSNR-a10-b1	sp|P53552|THO2_YEAST	sp|P53552|THO2_YEAST	intra-protein xl	aleitner_D1609_243.c.28181.28181.5_aleitner_D1609_243.c.27969.27969.5	960	967	7	3765.8	754.169	5	-0.3	0.42	0	27.76
DSPSENEEKPNKR-FKKDETIR-a9-b3	sp|P53552|THO2_YEAST	sp|P53552|THO2_YEAST	intra-protein xl	aleitner_D1609_243.c.05381.05381.3_aleitner_D1609_243.c.05338.05338.3	1533	1540	7	2702.35	901.792	3	0.4	0.18	0.82	27.64
KVEALDDSFKEK-LLYKINQEHR-a10-b4	sp|P17629|HPR1_YEAST	sp|P17629|HPR1_YEAST	intra-protein xl	aleitner_D1609_244.c.16545.16545.5_aleitner_D1609_244.c.16389.16389.5	621	627	6	2858.51	572.711	5	-0.9	0.2	0	27.5
NKDTAPHIVVATPGR-LKALVR-a2-b2	sp|Q07478|SUB2_YEAST	sp|Q07478|SUB2_YEAST	intra-protein xl	aleitner_D1609_244.c.15318.15318.5_aleitner_D1609_244.c.15190.15190.5	181	196	15	2411.4	483.288	5	-0.9	0.27	0	27.47
LLYKINQEHR-KLQDAR-a4-b1	sp|P17629|HPR1_YEAST	sp|P17629|HPR1_YEAST	intra-protein xl	aleitner_D1609_244.c.08735.08735.5_aleitner_D1609_244.c.08634.08634.5	627	635	8	2180.2	437.049	5	-0.7	0.33	0.43	27.41
QKTQQDILLFGK-VSFNKAER-a2-b5	sp|P53552|THO2_YEAST	sp|P53552|THO2_YEAST	intra-protein xl	aleitner_D1609_243.c.24862.24862.4_aleitner_D1609_243.c.24811.24811.4	394	634	240	2505.36	627.347	4	-0.8	0.23	0	27.31
IEQEVKKPEGVYEAAQAK-ISSETSGGEAKDEIIR-a7-b11	sp|P17629|HPR1_YEAST	sp|P17629|HPR1_YEAST	intra-protein xl	aleitner_D1609_241.c.11982.11982.4_aleitner_D1609_241.c.11887.11887.4	547	573	26	3844.95	962.246	4	-1.2	0.31	0.36	27.22
KVEALDDSFK-EKLLYK-a1-b2	sp|P17629|HPR1_YEAST	sp|P17629|HPR1_YEAST	intra-protein xl	aleitner_D1609_244.c.20689.20689.3_aleitner_D1609_244.c.20554.20554.3	612	623	11	2081.13	694.718	3	-0.2	0.28	0	27.2
IGKLQGLYDSVQVINR-KDSSEER-a3-b1	sp|P33441|MFT1_YEAST	sp|P33441|MFT1_YEAST	intra-protein xl	aleitner_D1609_244.c.28020.28020.4_aleitner_D1609_244.c.27976.27976.4	123	182	59	2789.45	698.371	4	-0.9	0.31	0	27.19
ISSETSGGEAKDEIIR-KPEGVYEAAQAKWESK-a11-b12	sp|P17629|HPR1_YEAST	sp|P17629|HPR1_YEAST	intra-protein xl	aleitner_D1609_244.c.25330.25330.5_aleitner_D1609_244.c.25173.25173.5	573	558	15	3648.81	730.77	5	-1.4	0.25	0.61	27.14
KALDRGELR-KTHEVIVK-a1-b1	sp|P38922|HRB1_YEAST	sp|P38922|HRB1_YEAST	intra-protein xl	aleitner_D1609_244.c.06247.06247.5_aleitner_D1609_244.c.06130.06130.5	247	259	12	2147.24	430.456	5	-1.1	0.37	0.5	27.09
DSPSENEEKPNKR-FKKDETIR-a12-b3	sp|P53552|THO2_YEAST	sp|P53552|THO2_YEAST	intra-protein xl	aleitner_D1609_243.c.05113.05113.3_aleitner_D1609_243.c.05338.05338.3	1536	1540	4	2702.35	901.79	3	-1.4	0.26	0.91	27.03
IEQEVKKPEGVYEAAQAK-ISSETSGGEAKDEIIR-a6-b11	sp|P17629|HPR1_YEAST	sp|P17629|HPR1_YEAST	intra-protein xl	aleitner_D1609_242.c.12203.12203.4_aleitner_D1609_242.c.11864.11864.4	546	573	27	3844.96	962.248	4	0.4	0.17	0.58	27
FPEKPFQEGK-LREEYKK-a4-b6	sp|P53552|THO2_YEAST	sp|P53552|THO2_YEAST	intra-protein xl	aleitner_D1609_243.c.13621.13621.4_aleitner_D1609_243.c.13483.13483.4	1503	1489	14	2308.21	578.06	4	-1	0.24	0	26.87
NYETACQNEQKQVALR-SVASGSAGLNSKDR-a11-b12	sp|P53552|THO2_YEAST	sp|P53552|THO2_YEAST	intra-protein xl	aleitner_D1609_244.c.13971.13971.3_aleitner_D1609_244.c.13845.13845.3	1238	1272	34	3436.65	1146.56	3	-3.1	0.29	0	26.61
YSGNAGGKDGYGSSNYRGPSNDR-YIKNISR-a8-b3	sp|P53552|THO2_YEAST	sp|P53552|THO2_YEAST	intra-protein xl	aleitner_D1609_243.c.11333.11333.4_aleitner_D1609_243.c.11189.11189.4	1415	1379	36	3408.6	853.159	4	-1.3	0.28	0	26.52
QDNPPPSNNIKER-KTHEVIVK-a11-b1	sp|P38922|HRB1_YEAST	sp|P38922|HRB1_YEAST	intra-protein xl	aleitner_D1609_244.c.05998.05998.4_aleitner_D1609_244.c.05661.05661.4	244	259	15	2598.38	650.602	4	-0.2	0.16	0	26.48
IYDDFSKGPK-FLIEKNYLK-a7-b5	sp|P33441|MFT1_YEAST	sp|P33441|MFT1_YEAST	intra-protein xl	aleitner_D1609_244.c.29377.29377.4_aleitner_D1609_244.c.29336.29336.4	197	170	27	2473.31	619.335	4	-2.1	0.2	0	26.47
FPEKPFQEGKDSSK-KNSSQR-a10-b1	sp|P53552|THO2_YEAST	sp|P53552|THO2_YEAST	intra-protein xl	aleitner_D1609_243.c.05390.05390.4_aleitner_D1609_243.c.05329.05329.4	1509	1490	19	2479.24	620.816	4	0.1	0.21	0.51	26.4
NKDTAPHIVVATPGR-EKYIDLSHVK-a2-b2	sp|Q07478|SUB2_YEAST	sp|Q07478|SUB2_YEAST	intra-protein xl	aleitner_D1609_241.c.12560.12560.5_aleitner_D1609_241.c.12496.12496.5	181	202	21	2943.58	589.724	5	-0.1	0.28	0	26.4
NKFQTQDYR-FKKDETIR-a2-b3	sp|P53552|THO2_YEAST	sp|P53552|THO2_YEAST	intra-protein xl	aleitner_D1609_244.c.12962.12962.4_aleitner_D1609_244.c.12859.12859.4	1547	1540	7	2372.21	594.06	4	-1.3	0.26	0	26.37
ISSETSGGEAKDEIIR-KLQDAR-a11-b1	sp|P17629|HPR1_YEAST	sp|P17629|HPR1_YEAST	intra-protein xl	aleitner_D1609_243.c.13345.13345.4_aleitner_D1609_243.c.13233.13233.4	573	635	62	2558.32	640.587	4	-0.2	0.21	0.55	26.36
SVASGSAGLNSKDR-DSPSENEEKPNKR-a12-b9	sp|P53552|THO2_YEAST	sp|P53552|THO2_YEAST	intra-protein xl	aleitner_D1609_244.c.04899.04899.4_aleitner_D1609_244.c.04875.04875.4	1272	1533	261	3014.45	754.62	4	-1.3	0.29	0	26.34
DSPSENEEKPNKR-KDETIR-a12-b1	sp|P53552|THO2_YEAST	sp|P53552|THO2_YEAST	intra-protein xl	aleitner_D1609_243.c.03738.03738.3_aleitner_D1609_243.c.03658.03658.3	1536	1540	4	2427.19	810.07	3	-0.8	0.3	0.33	26.34
LSTLTKELNHWRK-YSLKER-a6-b4	sp|O13539|THP2_YEAST	sp|O13539|THP2_YEAST	intra-protein xl	aleitner_D1609_244.c.17073.17073.4_aleitner_D1609_244.c.16994.16994.4	205	197	8	2557.4	640.358	4	-0.4	0.23	0	26.27
LTEQNISQLKESAHLR-DKLPDIK-a10-b2	sp|P33441|MFT1_YEAST	sp|P33441|MFT1_YEAST	intra-protein xl	aleitner_D1609_244.c.29471.29471.5_aleitner_D1609_244.c.29316.29316.5	65	106	41	2831.54	567.316	5	0.5	0.2	0.63	26.18
LSTLTKELNHWR-YSLKER-a6-b4	sp|O13539|THP2_YEAST	sp|O13539|THP2_YEAST	intra-protein xl	aleitner_D1609_243.c.21364.21364.5_aleitner_D1609_243.c.21201.21201.5	205	197	8	2429.3	486.868	5	-1.5	0.2	0.67	26.16
KFTENVVGGGER-KTHEVIVK-a1-b1	sp|P38922|HRB1_YEAST	sp|P38922|HRB1_YEAST	intra-protein xl	aleitner_D1609_244.c.09570.09570.4_aleitner_D1609_244.c.09485.09485.4	363	259	104	2382.29	596.58	4	-0.3	0.36	0.4	26.15
EKYIDLSHVK-DAELLKNK-a2-b6	sp|Q07478|SUB2_YEAST	sp|Q07478|SUB2_YEAST	intra-protein xl	aleitner_D1609_244.c.20385.20385.5_aleitner_D1609_244.c.20241.20241.5	202	179	23	2298.24	460.657	5	-0.9	0.15	0.59	26.13
ITSIFKEELLK-QEVSSYKEK-a6-b7	sp|P33441|MFT1_YEAST	sp|P33441|MFT1_YEAST	intra-protein xl	aleitner_D1609_244.c.26696.26696.4_aleitner_D1609_244.c.26597.26597.4	242	224	18	2554.38	639.602	4	-1.2	0.13	0.5	26.08
LLYKINQEHR-KKLQDAR-a4-b2	sp|P17629|HPR1_YEAST	sp|P17629|HPR1_YEAST	intra-protein xl	aleitner_D1609_244.c.06823.06823.4_aleitner_D1609_244.c.06836.06836.4	627	635	8	2308.3	578.083	4	-1.1	0.19	0	26.06
GPKELESINASMK-NYLKLVDPGLK-a3-b4	sp|P33441|MFT1_YEAST	sp|P33441|MFT1_YEAST	intra-protein xl	aleitner_D1609_244.c.30595.30595.4_aleitner_D1609_244.c.30701.30701.4	200	174	26	2799.51	700.886	4	0.8	0.22	0	26.06
FPEKPFQEGK-FKKDETIR-a4-b3	sp|P53552|THO2_YEAST	sp|P53552|THO2_YEAST	intra-protein xl	aleitner_D1609_244.c.17284.17284.5_aleitner_D1609_244.c.17294.17294.5	1503	1540	37	2379.24	476.857	5	-1.1	0.28	0.55	25.89
NYLDQIKMAR-AKFGLENK-a7-b2	sp|O13539|THP2_YEAST	sp|O13539|THP2_YEAST	intra-protein xl	aleitner_D1609_243.c.28822.28822.4_aleitner_D1609_243.c.28606.28606.4	182	187	5	2294.21	574.56	4	-1	0.23	0.58	25.43
DSSKANPYQASSYKR-FPEKPFQEGK-a4-b4	sp|P53552|THO2_YEAST	sp|P53552|THO2_YEAST	intra-protein xl	aleitner_D1609_244.c.17513.17513.4_aleitner_D1609_244.c.17540.17540.4	1513	1503	10	3044.49	762.13	4	-0.2	0.28	0	25.31
KVEALDDSFKEK-KLQDAR-a10-b1	sp|P17629|HPR1_YEAST	sp|P17629|HPR1_YEAST	intra-protein xl	aleitner_D1609_244.c.10158.10158.4_aleitner_D1609_244.c.10070.10070.4	621	635	14	2275.2	569.809	4	-1.3	0.24	0.22	25.26
LQNDPPKSVASGSAGLNSK-NYETACQNEQKQVALR-a7-b11	sp|P53552|THO2_YEAST	sp|P53552|THO2_YEAST	intra-protein xl	aleitner_D1609_244.c.16688.16688.4_aleitner_D1609_244.c.16569.16569.4	1260	1238	22	3957.95	990.495	4	0	0.26	0.39	25.17
EAQLLEDTKTGR-LRYDKYQTR-a9-b5	sp|O13539|THP2_YEAST	sp|O13539|THP2_YEAST	intra-protein xl	aleitner_D1609_244.c.16325.16325.5_aleitner_D1609_244.c.16257.16257.5	85	72	13	2739.41	548.89	5	-2.1	0.2	0.45	25.14
NYETACQNEQKQVALR-KQLELNKSQR-a11-b7	sp|P53552|THO2_YEAST	sp|P53552|THO2_YEAST	intra-protein xl	aleitner_D1609_244.c.13108.13108.5_aleitner_D1609_244.c.12955.12955.5	1238	1250	12	3331.69	667.345	5	-1.8	0.2	0	25.06
LTGSIINGTLSNDDSKIEK-YLDILGKVTK-a16-b7	sp|P33441|MFT1_YEAST	sp|P33441|MFT1_YEAST	intra-protein xl	aleitner_D1609_243.c.35878.35878.4_aleitner_D1609_243.c.35824.35824.4	52	33	19	3290.79	823.705	4	1.3	0.27	0.49	25.05
SAPKNIKPISSYAHK-KNSSQR-a4-b1	sp|P53552|THO2_YEAST	sp|P53552|THO2_YEAST	intra-protein xl	aleitner_D1609_243.c.04435.04435.5_aleitner_D1609_243.c.04353.04353.5	1434	1490	56	2496.34	500.277	5	-0.4	0.31	0	24.92
SVASGSAGLNSKDR-QLELNKSQR-a12-b6	sp|P53552|THO2_YEAST	sp|P53552|THO2_YEAST	intra-protein xl	aleitner_D1609_244.c.12123.12123.3_aleitner_D1609_244.c.11980.11980.3	1272	1250	22	2600.35	867.79	3	-1.8	0.14	0	24.76
DSPSENEEKPNKR-FKKDETIR-a9-b2	sp|P53552|THO2_YEAST	sp|P53552|THO2_YEAST	intra-protein xl	aleitner_D1609_243.c.05381.05381.3_aleitner_D1609_243.c.03963.03963.3	1533	1539	6	2702.35	901.792	3	0.4	0.16	0.29	24.74
SNTQALPQGPKGGNYVSR-KSNTQALPQGPK-a11-b1	sp|P53552|THO2_YEAST	sp|P53552|THO2_YEAST	intra-protein xl	aleitner_D1609_243.c.13909.13909.4_aleitner_D1609_243.c.13680.13680.4	1587	1576	11	3278.7	820.682	4	-0.8	0.2	0	24.73
SELPTRPSKSK-LREEYKK-a9-b6	sp|P53552|THO2_YEAST	sp|P53552|THO2_YEAST	intra-protein xl	aleitner_D1609_244.c.04955.04955.4_aleitner_D1609_244.c.04874.04874.4	1455	1489	34	2331.28	583.827	4	-0.9	0.21	0	24.56
KNALSGENTGHMSNR-DSPSENEEKPNKR-a1-b12	sp|P53552|THO2_YEAST	sp|P53552|THO2_YEAST	intra-protein xl	aleitner_D1609_243.c.03998.03998.4_aleitner_D1609_243.c.03949.03949.4	967	1536	569	3281.53	821.39	4	-0.9	0.24	0	24.49
KSNTQALPQGPK-NKFQTQDYR-a1-b2	sp|P53552|THO2_YEAST	sp|P53552|THO2_YEAST	intra-protein xl	aleitner_D1609_244.c.12328.12328.4_aleitner_D1609_244.c.12267.12267.4	1576	1547	29	2604.32	652.089	4	-2.1	0.28	0	24.45
LNNYNYGGCDLDISYAKR-KFTENVVGGGER-a17-b1	sp|P38922|HRB1_YEAST	sp|P38922|HRB1_YEAST	intra-protein xl	aleitner_D1609_243.c.26834.26834.4_aleitner_D1609_243.c.26703.26703.4	452	363	89	3564.69	892.181	4	-0.1	0.32	0	24.32
SSDDLLTESLKK-YINLLKR-a11-b6	sp|O13539|THP2_YEAST	sp|O13539|THP2_YEAST	intra-protein xl	aleitner_D1609_244.c.30850.30850.4_aleitner_D1609_244.c.30743.30743.4	52	122	70	2391.32	598.838	4	-2	0.14	0	24.12
YSGNAGGKDGYGSSNYRGPSNDR-SKTYNDR-a8-b2	sp|P53552|THO2_YEAST	sp|P53552|THO2_YEAST	intra-protein xl	aleitner_D1609_244.c.07064.07064.4_aleitner_D1609_244.c.06981.06981.4	1415	1457	42	3398.51	850.636	4	-0.3	0.26	0	24.06
KSNTQALPQGPK-SELPTRPSKSK-a1-b9	sp|P53552|THO2_YEAST	sp|P53552|THO2_YEAST	intra-protein xl	aleitner_D1609_244.c.07138.07138.4_aleitner_D1609_244.c.06853.06853.4	1576	1455	121	2634.43	659.616	4	-0.5	0.28	0.25	24.01
LSTLTKELNHWR-MIQKIDSLK-a6-b4	sp|O13539|THP2_YEAST	sp|O13539|THP2_YEAST	intra-protein xl	aleitner_D1609_244.c.25607.25607.4_aleitner_D1609_244.c.25606.25606.4	205	235	30	2709.48	678.379	4	-2	0.26	0	23.87
RDSPSENEEKPNKR-FKKDETIR-a10-b3	sp|P53552|THO2_YEAST	sp|P53552|THO2_YEAST	intra-protein xl	aleitner_D1609_243.c.03828.03828.5_aleitner_D1609_243.c.04077.04077.5	1533	1540	7	2858.45	572.698	5	-1.3	0.16	0	23.85
INSASQTEGDELKSEQTQPK-ALEEEASFPEREQKIK-a13-b14	sp|P17629|HPR1_YEAST	sp|P17629|HPR1_YEAST	intra-protein xl	aleitner_D1609_243.c.17403.17403.4_aleitner_D1609_243.c.17365.17365.4	683	665	18	4230.08	1058.53	4	-1.1	0.2	0	23.76
QDNPPPSNNIKER-KALDRGELR-a11-b1	sp|P38922|HRB1_YEAST	sp|P38922|HRB1_YEAST	intra-protein xl	aleitner_D1609_244.c.09167.09167.4_aleitner_D1609_244.c.09221.09221.4	244	247	3	2702.41	676.61	4	-1	0.25	0	23.75
SELPTRPSKSK-YIKNISR-a9-b3	sp|P53552|THO2_YEAST	sp|P53552|THO2_YEAST	intra-protein xl	aleitner_D1609_244.c.09121.09121.5_aleitner_D1609_244.c.09047.09047.5	1455	1379	76	2259.26	452.859	5	-1.3	0.2	0	23.65
EAQLLEDTKTGR-YINLLKR-a9-b6	sp|O13539|THP2_YEAST	sp|O13539|THP2_YEAST	intra-protein xl	aleitner_D1609_244.c.25757.25757.4_aleitner_D1609_244.c.25627.25627.4	85	122	37	2416.33	605.091	4	-0.6	0.21	0	23.63
DSSKANPYQASSYK-SQLRFPEKPFQEGK-a4-b8	sp|P53552|THO2_YEAST	sp|P53552|THO2_YEAST	intra-protein xl	aleitner_D1609_244.c.22334.22334.4_aleitner_D1609_244.c.22094.22094.4	1513	1503	10	3372.66	844.172	4	-1.4	0.27	0	23.62
NIKPISSYAHKR-SKTYNDR-a11-b2	sp|P53552|THO2_YEAST	sp|P53552|THO2_YEAST	intra-protein xl	aleitner_D1609_244.c.06660.06660.5_aleitner_D1609_244.c.06597.06597.5	1445	1457	12	2433.27	487.663	5	-0.9	0.22	0	23.59
TLIQNPQNPDFAEKIDSLKR-YIKNISR-a14-b3	sp|P53552|THO2_YEAST	sp|P53552|THO2_YEAST	intra-protein xl	aleitner_D1609_244.c.28637.28637.5_aleitner_D1609_244.c.27997.27997.5	1370	1379	9	3356.81	672.37	5	-0.2	0.21	0.36	23.47
KSNTQALPQGPK-FKKDETIR-a1-b2	sp|P53552|THO2_YEAST	sp|P53552|THO2_YEAST	intra-protein xl	aleitner_D1609_243.c.06649.06649.3_aleitner_D1609_243.c.06455.06455.3	1576	1539	37	2441.32	814.783	3	-1.1	0.18	0	23.43
DSQLEETKAHYTNLYVK-KQYEAYR-a8-b1	sp|P04147|PABP_YEAST	sp|P04147|PABP_YEAST	intra-protein xl	aleitner_D1609_243.c.25735.25735.4_aleitner_D1609_243.c.25753.25753.4	215	306	91	3132.54	784.142	4	-0.8	0.28	0	23.27
ISSETSGGEAKDEIIR-YLFDFDKVNEK-a11-b7	sp|P17629|HPR1_YEAST	sp|P17629|HPR1_YEAST	intra-protein xl	aleitner_D1609_243.c.32405.32405.4_aleitner_D1609_243.c.32327.32327.4	573	596	23	3245.6	812.407	4	-0.3	0.25	0	23.19
DSPSENEEKPNKR-NKFQTQDYR-a9-b2	sp|P53552|THO2_YEAST	sp|P53552|THO2_YEAST	intra-protein xl	aleitner_D1609_244.c.07780.07780.4_aleitner_D1609_244.c.07687.07687.4	1533	1547	14	2865.35	717.346	4	0.4	0.31	0	23
ITSIFKEELLK-DKLPDIK-a6-b2	sp|P33441|MFT1_YEAST	sp|P33441|MFT1_YEAST	intra-protein xl	aleitner_D1609_244.c.34287.34287.4_aleitner_D1609_244.c.34184.34184.4	242	106	136	2285.31	572.335	4	-1.6	0.18	0	22.88
DSPSENEEKPNKR-FKKDETIR-a12-b2	sp|P53552|THO2_YEAST	sp|P53552|THO2_YEAST	intra-protein xl	aleitner_D1609_244.c.03729.03729.4_aleitner_D1609_244.c.03948.03948.4	1536	1539	3	2702.35	676.595	4	-0.2	0.16	0.78	22.83
FPEKPFQEGKDSSK-LREEYKK-a10-b6	sp|P53552|THO2_YEAST	sp|P53552|THO2_YEAST	intra-protein xl	aleitner_D1609_243.c.09232.09232.5_aleitner_D1609_243.c.09083.09083.5	1509	1489	20	2725.39	546.086	5	-1.9	0.36	0.71	22.81
FKKDETIR-LREEYKK-a2-b6	sp|P53552|THO2_YEAST	sp|P53552|THO2_YEAST	intra-protein xl	aleitner_D1609_244.c.04462.04462.5_aleitner_D1609_244.c.04386.04386.5	1539	1489	50	2138.17	428.642	5	-2.1	0.21	0.83	22.74
NANDNNQFYQQKQR-AIEQLNYTPIKGR-a12-b11	sp|P04147|PABP_YEAST	sp|P04147|PABP_YEAST	intra-protein xl	aleitner_D1609_244.c.21374.21374.4_aleitner_D1609_244.c.21216.21216.4	504	105	399	3406.7	852.684	4	0.3	0.19	0	22.57
IGKLQGLYDSVQVINR-IYDDFSKGPK-a3-b7	sp|P33441|MFT1_YEAST	sp|P33441|MFT1_YEAST	intra-protein xl	aleitner_D1609_244.c.35883.35883.4_aleitner_D1609_244.c.35709.35709.4	123	197	74	3108.65	778.17	4	-0.8	0.2	0	22.44
RDSPSENEEKPNKR-FKKDETIR-a13-b3	sp|P53552|THO2_YEAST	sp|P53552|THO2_YEAST	intra-protein xl	aleitner_D1609_244.c.03807.03807.5_aleitner_D1609_244.c.03730.03730.5	1536	1540	4	2858.45	572.698	5	-0.7	0.18	0	22.4
EAQLLEDTKTGR-NYLDQIKMAR-a9-b7	sp|O13539|THP2_YEAST	sp|O13539|THP2_YEAST	intra-protein xl	aleitner_D1609_244.c.28917.28917.4_aleitner_D1609_244.c.28881.28881.4	85	182	97	2748.41	688.112	4	1.2	0.18	0	22.39
LLYKINQEHRK-KVEALDDSFK-a4-b1	sp|P17629|HPR1_YEAST	sp|P17629|HPR1_YEAST	intra-protein xl	aleitner_D1609_243.c.15212.15212.5_aleitner_D1609_243.c.15099.15099.5	627	612	15	2729.47	546.902	5	-0.8	0.3	0	22.21
RDSPSENEEKPNKR-NKFQTQDYR-a13-b2	sp|P53552|THO2_YEAST	sp|P53552|THO2_YEAST	intra-protein xl	aleitner_D1609_243.c.05615.05615.4_aleitner_D1609_243.c.05536.05536.4	1536	1547	11	3021.45	756.369	4	-2.5	0.21	0	22.13
QDNPPPSNNIKER-ELDSTYEEKVNR-a11-b9	sp|P38922|HRB1_YEAST	sp|P38922|HRB1_YEAST	intra-protein xl	aleitner_D1609_244.c.15150.15150.4_aleitner_D1609_244.c.14976.14976.4	244	154	90	3127.5	782.884	4	-0.9	0.16	0	21.91
DSPSENEEKPNKR-KDETIR-a9-b1	sp|P53552|THO2_YEAST	sp|P53552|THO2_YEAST	intra-protein xl	aleitner_D1609_244.c.03973.03973.4_aleitner_D1609_244.c.03894.03894.4	1533	1540	7	2427.19	607.805	4	-0.3	0.39	0.32	21.87
ELDSTYEEKVNR-KALDR-a9-b1	sp|P38922|HRB1_YEAST	sp|P38922|HRB1_YEAST	intra-protein xl	aleitner_D1609_244.c.14348.14348.4_aleitner_D1609_244.c.14231.14231.4	154	247	93	2221.12	556.288	4	-0.2	0.12	0.62	21.82
SQLRFPEKPFQEGKDSSK-KNSSQR-a14-b1	sp|P53552|THO2_YEAST	sp|P53552|THO2_YEAST	intra-protein xl	aleitner_D1609_243.c.08896.08896.5_aleitner_D1609_243.c.08832.08832.5	1509	1490	19	2963.51	593.709	5	-1.6	0.16	0	21.81
KSNTQALPQGPK-FKKDETIR-a1-b3	sp|P53552|THO2_YEAST	sp|P53552|THO2_YEAST	intra-protein xl	aleitner_D1609_244.c.06449.06449.3_aleitner_D1609_244.c.06311.06311.3	1576	1540	36	2441.33	814.783	3	-0.8	0.2	0	21.8
SVASGSAGLNSKDR-KSNTQALPQGPK-a12-b1	sp|P53552|THO2_YEAST	sp|P53552|THO2_YEAST	intra-protein xl	aleitner_D1609_244.c.08814.08814.4_aleitner_D1609_244.c.08648.08648.4	1272	1576	304	2753.43	689.365	4	-1.5	0.18	0	21.74
YSGNAGGKDGYGSSNYR-SELPTRPSKSK-a8-b9	sp|P53552|THO2_YEAST	sp|P53552|THO2_YEAST	intra-protein xl	aleitner_D1609_244.c.08752.08752.5_aleitner_D1609_244.c.08805.08805.5	1415	1455	40	3118.49	624.706	5	-1.2	0.13	0	21.68
DSSKANPYQASSYK-FPEKPFQEGK-a4-b4	sp|P53552|THO2_YEAST	sp|P53552|THO2_YEAST	intra-protein xl	aleitner_D1609_244.c.20808.20808.3_aleitner_D1609_244.c.20493.20493.3	1513	1503	10	2888.38	963.802	3	-1.1	0.21	0.4	21.68
KNALSGENTGHMSNR-NKFQTQDYR-a1-b2	sp|P53552|THO2_YEAST	sp|P53552|THO2_YEAST	intra-protein xl	aleitner_D1609_244.c.10114.10114.4_aleitner_D1609_244.c.10084.10084.4	967	1547	580	2951.39	738.856	4	-0.4	0.18	0	21.59
VTKLTGSIINGTLSNDDSK-IEKLTEQNISQLK-a3-b3	sp|P33441|MFT1_YEAST	sp|P33441|MFT1_YEAST	intra-protein xl	aleitner_D1609_241.c.21095.21095.4_aleitner_D1609_241.c.20942.20942.4	36	55	19	3642.95	911.746	4	-0.7	0.21	0	21.58
ITSIFKEELLK-LVDPGLKK-a6-b7	sp|P33441|MFT1_YEAST	sp|P33441|MFT1_YEAST	intra-protein xl	aleitner_D1609_244.c.30944.30944.4_aleitner_D1609_244.c.30902.30902.4	242	181	61	2326.37	582.601	4	-0.8	0.18	0	21.58
DSPSENEEKPNKR-KSNTQALPQGPK-a9-b1	sp|P53552|THO2_YEAST	sp|P53552|THO2_YEAST	intra-protein xl	aleitner_D1609_244.c.04981.04981.4_aleitner_D1609_244.c.04658.04658.4	1533	1576	43	2934.47	734.625	4	0.6	0.27	0	21.46
SWYIMSGKNDTLSNHFVK-SLANYKTDPVLK-a8-b6	sp|P53851|TEX1_YEAST	sp|P53851|TEX1_YEAST	intra-protein xl	aleitner_D1609_244.c.31953.31953.4_aleitner_D1609_244.c.31912.31912.4	358	339	19	3611.84	903.967	4	0.6	0.32	0	21.44
LKDALELDEFCTLTEEEAEQK-NYETACQNEQKQVALR-a2-b11	sp|P53552|THO2_YEAST	sp|P53552|THO2_YEAST	intra-protein xl	aleitner_D1609_241.c.24694.24694.4_aleitner_D1609_241.c.24615.24615.4	1197	1238	41	4599.17	1150.8	4	0.8	0.21	0.44	21.32
ISEETNADIESKGK-QKTQQDILLFGK-a12-b2	sp|P53552|THO2_YEAST	sp|P53552|THO2_YEAST	intra-protein xl	aleitner_D1609_243.c.23959.23959.4_aleitner_D1609_243.c.23873.23873.4	390	394	4	3075.6	769.907	4	0	0.16	0.29	21.12
AIEQLNYTPIKGR-LKGFGFVNYEK-a11-b2	sp|P04147|PABP_YEAST	sp|P04147|PABP_YEAST	intra-protein xl	aleitner_D1609_244.c.31472.31472.4_aleitner_D1609_244.c.31367.31367.4	105	259	154	2940.57	736.151	4	-0.9	0.17	0	21.06
DSPSENEEKPNKR-IDSLKR-a9-b5	sp|P53552|THO2_YEAST	sp|P53552|THO2_YEAST	intra-protein xl	aleitner_D1609_244.c.05260.05260.4_aleitner_D1609_244.c.04819.04819.4	1533	1375	158	2397.22	600.312	4	1.6	0.12	0	20.91
NDTLSNHFVKNEK-TSKNTDR-a10-b3	sp|P53851|TEX1_YEAST	sp|P53851|TEX1_YEAST	intra-protein xl	aleitner_D1609_243.c.06312.06312.4_aleitner_D1609_243.c.06187.06187.4	368	405	37	2503.22	626.814	4	-2.5	0.15	0	20.87
ISSETSGGEAKDEIIR-KVEALDDSFK-a11-b1	sp|P17629|HPR1_YEAST	sp|P17629|HPR1_YEAST	intra-protein xl	aleitner_D1609_244.c.22641.22641.4_aleitner_D1609_244.c.22708.22708.4	573	612	39	2979.49	745.881	4	0.5	0.16	0	20.83
LQNDPPKSVASGSAGLNSK-QLELNKSQR-a7-b6	sp|P53552|THO2_YEAST	sp|P53552|THO2_YEAST	intra-protein xl	aleitner_D1609_244.c.15449.15449.4_aleitner_D1609_244.c.15406.15406.4	1260	1250	10	3121.63	781.416	4	-1.3	0.25	0	20.81
IYDDFSKGPK-LVDPGLKK-a7-b7	sp|P33441|MFT1_YEAST	sp|P33441|MFT1_YEAST	intra-protein xl	aleitner_D1609_244.c.19486.19486.4_aleitner_D1609_244.c.19323.19323.4	197	181	16	2175.18	544.804	4	0.7	0.27	0	20.67
RSELPTRPSKSK-LREEYKK-a10-b6	sp|P53552|THO2_YEAST	sp|P53552|THO2_YEAST	intra-protein xl	aleitner_D1609_243.c.04023.04023.5_aleitner_D1609_243.c.03944.03944.5	1455	1489	34	2487.38	498.484	5	-0.8	0.11	0	20.66
YSGNAGGKDGYGSSNYR-NIKPISSYAHKR-a8-b11	sp|P53552|THO2_YEAST	sp|P53552|THO2_YEAST	intra-protein xl	aleitner_D1609_244.c.10326.10326.5_aleitner_D1609_244.c.10221.10221.5	1415	1445	30	3302.61	661.529	5	-0.6	0.2	0	20.53
SELPTRPSKSK-FKKDETIR-a9-b3	sp|P53552|THO2_YEAST	sp|P53552|THO2_YEAST	intra-protein xl	aleitner_D1609_244.c.07669.07669.5_aleitner_D1609_244.c.07537.07537.5	1455	1540	85	2402.31	481.471	5	-1.3	0.12	0.69	20.52
ALEEEASFPEREQKIK-SEQTQPKGEISEENTK-a14-b7	sp|P17629|HPR1_YEAST	sp|P17629|HPR1_YEAST	intra-protein xl	aleitner_D1609_242.c.09696.09696.4_aleitner_D1609_242.c.09626.09626.4	665	690	25	3844.88	962.229	4	-0.6	0.51	0	20.49
ITSIFKEELLKR-DKLPDIK-a6-b2	sp|P33441|MFT1_YEAST	sp|P33441|MFT1_YEAST	intra-protein xl	aleitner_D1609_244.c.30218.30218.4_aleitner_D1609_244.c.30048.30048.4	242	106	136	2441.41	611.361	4	-0.7	0.2	0	20.42
INSASQTEGDELKSEQTQPK-GEISEENTKIK-a13-b9	sp|P17629|HPR1_YEAST	sp|P17629|HPR1_YEAST	intra-protein xl	aleitner_D1609_244.c.14847.14847.4_aleitner_D1609_244.c.13599.13599.4	683	699	16	3573.75	894.446	4	-0.5	0.15	0	20.29
DSPSENEEKPNKR-ANPYQASSYKR-a9-b10	sp|P53552|THO2_YEAST	sp|P53552|THO2_YEAST	intra-protein xl	aleitner_D1609_244.c.07383.07383.3_aleitner_D1609_244.c.07214.07214.3	1533	1523	10	2950.4	984.475	3	-1.4	0.35	0	20.27
NYETACQNEQKQVALR-KSNTQALPQGPK-a11-b1	sp|P53552|THO2_YEAST	sp|P53552|THO2_YEAST	intra-protein xl	aleitner_D1609_244.c.13281.13281.4_aleitner_D1609_244.c.13158.13158.4	1238	1576	338	3356.68	840.178	4	0.5	0.17	0	20.22
DSPSENEEKPNKR-KSNTQALPQGPK-a12-b1	sp|P53552|THO2_YEAST	sp|P53552|THO2_YEAST	intra-protein xl	aleitner_D1609_243.c.04904.04904.3_aleitner_D1609_243.c.04885.04885.3	1536	1576	40	2934.47	979.164	3	-0.3	0.16	0	19.97
NYETACQNEQKQVALR-DSPSENEEKPNKR-a11-b12	sp|P53552|THO2_YEAST	sp|P53552|THO2_YEAST	intra-protein xl	aleitner_D1609_244.c.09551.09551.4_aleitner_D1609_244.c.09099.09099.4	1238	1536	298	3617.7	905.433	4	-0.5	0.14	0	19.89
EPYPDTTSSYSEAAAPEYTKR-KSNTQALPQGPK-a20-b1	sp|P53552|THO2_YEAST	sp|P53552|THO2_YEAST	intra-protein xl	aleitner_D1609_241.c.11711.11711.4_aleitner_D1609_241.c.11639.11639.4	1403	1576	173	3767.81	942.96	4	-1.8	0.35	0	19.88
SNTQALPQGPKGGNYVSR-NKFQTQDYR-a11-b2	sp|P53552|THO2_YEAST	sp|P53552|THO2_YEAST	intra-protein xl	aleitner_D1609_244.c.17789.17789.3_aleitner_D1609_244.c.17622.17622.3	1587	1547	40	3209.59	1070.87	3	0.7	0.1	0	19.84
NYETACQNEQKQVALR-KQLELNKSQR-a11-b1	sp|P53552|THO2_YEAST	sp|P53552|THO2_YEAST	intra-protein xl	aleitner_D1609_243.c.13482.13482.5_aleitner_D1609_243.c.13416.13416.5	1238	1244	6	3331.69	667.345	5	-2.4	0.12	0	19.84
ELDSTYEEKVNR-KALDRGELR-a9-b1	sp|P38922|HRB1_YEAST	sp|P38922|HRB1_YEAST	intra-protein xl	aleitner_D1609_243.c.15860.15860.3_aleitner_D1609_243.c.15742.15742.3	154	247	93	2676.37	893.13	3	-1.9	0.13	0	19.49
VNEKTGVDGLFEEPR-KVEALDDSFKEK-a4-b10	sp|P17629|HPR1_YEAST	sp|P17629|HPR1_YEAST	intra-protein xl	aleitner_D1609_244.c.25624.25624.4_aleitner_D1609_244.c.25471.25471.4	600	621	21	3234.63	809.665	4	-0.3	0.25	0	19.4
LQNDPPKSVASGSAGLNSK-NKFQTQDYR-a7-b2	sp|P53552|THO2_YEAST	sp|P53552|THO2_YEAST	intra-protein xl	aleitner_D1609_244.c.16368.16368.4_aleitner_D1609_244.c.16269.16269.4	1260	1547	287	3205.59	802.406	4	-1.9	0.21	0	19.28
SSDDLLTESLKK-AKFGLENK-a11-b2	sp|O13539|THP2_YEAST	sp|O13539|THP2_YEAST	intra-protein xl	aleitner_D1609_243.c.27102.27102.4_aleitner_D1609_243.c.26993.26993.4	52	187	135	2378.26	595.573	4	1	0.2	0	19.27
DSPSENEEKPNKR-NKFQTQDYR-a12-b2	sp|P53552|THO2_YEAST	sp|P53552|THO2_YEAST	intra-protein xl	aleitner_D1609_244.c.07945.07945.3_aleitner_D1609_244.c.07695.07695.3	1536	1547	11	2865.36	956.126	3	1	0.39	0	19.21
DSPSENEEKPNKR-SELPTRPSKSK-a9-b9	sp|P53552|THO2_YEAST	sp|P53552|THO2_YEAST	intra-protein xl	aleitner_D1609_243.c.04258.04258.4_aleitner_D1609_243.c.04200.04200.4	1533	1455	78	2895.46	724.872	4	0	0.2	0.23	19.15
DSPSENEEKPNKR-ANPYQASSYKR-a12-b10	sp|P53552|THO2_YEAST	sp|P53552|THO2_YEAST	intra-protein xl	aleitner_D1609_243.c.07032.07032.5_aleitner_D1609_243.c.06922.06922.5	1536	1523	13	2950.4	591.088	5	-1.4	0.41	0	19.05
DVAAGVQNPKSISEYYSTFEHLNR-YINLLKR-a10-b6	sp|O13539|THP2_YEAST	sp|O13539|THP2_YEAST	intra-protein xl	aleitner_D1609_243.c.37733.37733.5_aleitner_D1609_243.c.37504.37504.5	98	122	24	3780.94	757.197	5	-0.9	0.13	0.54	18.97
NYETACQNEQKQVALRK-YIKNISR-a11-b3	sp|P53552|THO2_YEAST	sp|P53552|THO2_YEAST	intra-protein xl	aleitner_D1609_244.c.12447.12447.5_aleitner_D1609_244.c.12313.12313.5	1238	1379	141	3109.6	622.927	5	0.1	0.19	0.68	18.92
SREDDDEVHFDKTTFSK-LIHVPKEDNSK-a12-b6	sp|P15424|MS116_YEAST	sp|P15424|MS116_YEAST	intra-protein xl	aleitner_D1609_242.c.11445.11445.6_aleitner_D1609_242.c.11302.11302.6	84	95	11	3471.68	579.621	6	-0.8	0.11	0	18.92
IGKLQGLYDSVQVINR-LVDPGLKK-a3-b7	sp|P33441|MFT1_YEAST	sp|P33441|MFT1_YEAST	intra-protein xl	aleitner_D1609_244.c.33850.33850.4_aleitner_D1609_244.c.33771.33771.4	123	181	58	2808.61	703.16	4	-1.1	0.17	0.63	18.74
LQNDPPKSVASGSAGLNSK-NYETACQNEQKQVALRK-a7-b11	sp|P53552|THO2_YEAST	sp|P53552|THO2_YEAST	intra-protein xl	aleitner_D1609_242.c.08753.08753.5_aleitner_D1609_242.c.08502.08502.5	1260	1238	22	4086.03	818.214	5	-3.2	0.19	0	18.66
LTGSIINGTLSNDDSKIEK-LTEQNISQLKESAHLR-a16-b10	sp|P33441|MFT1_YEAST	sp|P33441|MFT1_YEAST	intra-protein xl	aleitner_D1609_242.c.20461.20461.6_aleitner_D1609_242.c.20426.20426.6	52	65	13	4008.1	669.024	6	-0.6	0.22	0.64	18.6
IYDDFSKGPK-SIHSKLLLR-a7-b5	sp|P33441|MFT1_YEAST	sp|P33441|MFT1_YEAST	intra-protein xl	aleitner_D1609_244.c.21828.21828.4_aleitner_D1609_244.c.21715.21715.4	197	116	81	2372.31	594.085	4	-0.8	0.13	0	18.55
LQNDPPKSVASGSAGLNSK-DSPSENEEKPNKR-a7-b12	sp|P53552|THO2_YEAST	sp|P53552|THO2_YEAST	intra-protein xl	aleitner_D1609_244.c.08060.08060.4_aleitner_D1609_244.c.08028.08028.4	1260	1536	276	3535.74	884.942	4	-0.1	0.17	0	18.37
DSPSENEEKPNKR-YIKNISR-a9-b3	sp|P53552|THO2_YEAST	sp|P53552|THO2_YEAST	intra-protein xl	aleitner_D1609_243.c.06359.06359.4_aleitner_D1609_243.c.06222.06222.4	1533	1379	154	2559.29	640.83	4	-1.4	0.18	0.35	18.34
YDSKGAPTGIAVVEYDNVDDADVCIER-KFTENVVGGGER-a4-b1	sp|P38922|HRB1_YEAST	sp|P38922|HRB1_YEAST	intra-protein xl	aleitner_D1609_242.c.21264.21264.4_aleitner_D1609_242.c.21259.21259.4	412	363	49	4400.09	1101.03	4	4.2	0.14	0	18.31
ELDSTYEEKVNR-KTHEVIVK-a9-b1	sp|P38922|HRB1_YEAST	sp|P38922|HRB1_YEAST	intra-protein xl	aleitner_D1609_244.c.12306.12306.5_aleitner_D1609_244.c.12189.12189.5	154	259	105	2572.34	515.475	5	-1.3	0.12	0.41	18.25
SNTQALPQGPKGGNYVSR-SVASGSAGLNSKDR-a11-b12	sp|P53552|THO2_YEAST	sp|P53552|THO2_YEAST	intra-protein xl	aleitner_D1609_243.c.14397.14397.4_aleitner_D1609_243.c.14370.14370.4	1587	1272	315	3358.69	840.68	4	0.4	0.11	0	18.09
YSGNAGGKDGYGSSNYRGPSNDR-KNSSQR-a8-b1	sp|P53552|THO2_YEAST	sp|P53552|THO2_YEAST	intra-protein xl	aleitner_D1609_243.c.04374.04374.5_aleitner_D1609_243.c.04256.04256.5	1415	1490	75	3234.47	647.901	5	0.2	0.23	0	18.01
DSSKANPYQASSYKR-SQLRFPEKPFQEGK-a4-b8	sp|P53552|THO2_YEAST	sp|P53552|THO2_YEAST	intra-protein xl	aleitner_D1609_244.c.19215.19215.4_aleitner_D1609_244.c.19139.19139.4	1513	1503	10	3528.76	883.198	4	-1.4	0.15	0	17.79
QDNPPPSNNIKER-KFTENVVGGGER-a11-b1	sp|P38922|HRB1_YEAST	sp|P38922|HRB1_YEAST	intra-protein xl	aleitner_D1609_244.c.13157.13157.4_aleitner_D1609_244.c.13033.13033.4	244	363	119	2937.45	735.372	4	-0.9	0.18	0	17.35
KSNTQALPQGPK-ANPYQASSYKR-a1-b10	sp|P53552|THO2_YEAST	sp|P53552|THO2_YEAST	intra-protein xl	aleitner_D1609_243.c.11438.11438.4_aleitner_D1609_243.c.11377.11377.4	1576	1523	53	2689.39	673.354	4	0.8	0.13	0	17.34
NIKPISSYAHK-SELPTRPSKSK-a3-b9	sp|P53552|THO2_YEAST	sp|P53552|THO2_YEAST	intra-protein xl	aleitner_D1609_244.c.09075.09075.4_aleitner_D1609_244.c.08950.08950.4	1437	1455	18	2623.43	656.865	4	-1.4	0.14	0.88	17.21
VNEKTGVDGLFEEPR-KPEGVYEAAQAK-a4-b1	sp|P17629|HPR1_YEAST	sp|P17629|HPR1_YEAST	intra-protein xl	aleitner_D1609_243.c.24235.24235.4_aleitner_D1609_243.c.24263.24263.4	600	547	53	3116.57	780.149	4	-0.1	0.16	0	17.1
SVASGSAGLNSKDRYTYSR-ISEETNADIESKGK-a12-b12	sp|P53552|THO2_YEAST	sp|P53552|THO2_YEAST	intra-protein xl	aleitner_D1609_244.c.12386.12386.4_aleitner_D1609_244.c.12163.12163.4	1272	390	882	3675.78	919.953	4	-1.7	0.25	0	16.73
TAVFYGGTPISKDAELLK-FSKYMPDVK-a12-b3	sp|Q07478|SUB2_YEAST	sp|Q07478|SUB2_YEAST	intra-protein xl	aleitner_D1609_243.c.34356.34356.4_aleitner_D1609_243.c.34257.34257.4	173	155	18	3160.64	791.168	4	-0.2	0.14	0	16.08

## Sheet: 1 mM DMTMM
1 mM DMTMM cross-links low-resolution MS/MS
Inter-subunit cross-links
Id	Protein1	Protein2	XLType	Spectrum	AbsPos1	AbsPos2	deltaAA	Mr	Mz	z	Error_rel[ppm]	TIC	deltaS	ld-Score
IYLFDVKK-SDIENVR-a7-b2	sp|P53851|TEX1_YEAST	sp|P33441|MFT1_YEAST	inter-protein xl	aleitner_D1807_022.c.09714.09714.4_aleitner_D1807_022.c.09714.09714.4	190	212		1837.99	460.506	4	-0.5	0.42	0.64	27.28
KFTFIK-WIDYVR-a1-b3	sp|P17629|HPR1_YEAST	sp|P53552|THO2_YEAST	inter-protein xl	aleitner_D1807_024.c.08423.08423.3_aleitner_D1807_024.c.08423.08423.3	517	575		1614.89	539.305	3	-1	0.56	0.49	26.84
NYLDQIKMAR-EVEGLSEGR-a7-b1	sp|O13539|THP2_YEAST	sp|P33441|MFT1_YEAST	inter-protein xl	aleitner_D1807_020.c.12379.12379.3_aleitner_D1807_020.c.12379.12379.3	182	137		2207.1	736.707	3	-1	0.27	0.9	26.67
AKFGLENK-ELGTDLVK-a2-b1	sp|O13539|THP2_YEAST	sp|P33441|MFT1_YEAST	inter-protein xl	aleitner_D1807_020.c.08876.08876.4_aleitner_D1807_020.c.08876.08876.4	187	158		1760.96	441.249	4	-1.8	0.36	0.6	25.66
Intra-subunit cross-links
Id	Protein1	Protein2	XLType	Spectrum	AbsPos1	AbsPos2	deltaAA	Mr	Mz	z	Error_rel[ppm]	TIC	deltaS	ld-Score
KPEGVYEAAQAK-IEQEVK-a1-b4	sp|P17629|HPR1_YEAST	sp|P17629|HPR1_YEAST	intra-protein xl	aleitner_D1807_020.c.02118.02118.3_aleitner_D1807_020.c.02118.02118.3	547	544	3	2016.05	673.024	3	-1.4	0.42	0.61	31.92
ALEEEASFPER-IKSQR-a3-b2	sp|P17629|HPR1_YEAST	sp|P17629|HPR1_YEAST	intra-protein xl	aleitner_D1807_020.c.02512.02512.4_aleitner_D1807_020.c.02512.02512.4	654	667	13	1888.96	473.248	4	-1.5	0.28	0.74	25.9
IPTGLDKIEQEVK-KPEGVYEAAQAK-a11-b1	sp|P17629|HPR1_YEAST	sp|P17629|HPR1_YEAST	intra-protein xl	aleitner_D1807_023.c.10986.10986.3_aleitner_D1807_023.c.10986.10986.3	544	547	3	2740.46	914.495	3	-0.7	0.28	0.87	25.2
DDDDKGENLYFQ-DHDGDYK-a5-b5	sp|P17629|HPR1_YEAST	sp|P17629|HPR1_YEAST	intra-protein xl	aleitner_D1807_020.c.07225.07225.3_aleitner_D1807_020.c.07225.07225.3	764	757	7	2287.91	763.645	3	-1.1	0.29	0.88	23.66
VNEKTGVDGLFEEPR-KVEALDDSFK-a3-b1	sp|P17629|HPR1_YEAST	sp|P17629|HPR1_YEAST	intra-protein xl	aleitner_D1807_021.c.12308.12308.4_aleitner_D1807_021.c.12308.12308.4	599	612	13	2821.42	706.362	4	1.4	0.25	0.53	23.43
AHIQLVYTTLEENLINEER-EDIKLPSSALIGHLK-a17-b4	sp|P53552|THO2_YEAST	sp|P53552|THO2_YEAST	intra-protein xl	aleitner_D1807_022.c.20588.20588.5_aleitner_D1807_022.c.20588.20588.5	1176	1182	6	3886.08	778.224	5	-0.9	0.37	0.53	23.15
TGVDGLFEEPR-KVEALDDSFK-a9-b1	sp|P17629|HPR1_YEAST	sp|P17629|HPR1_YEAST	intra-protein xl	aleitner_D1807_020.c.16964.16964.4_aleitner_D1807_020.c.16964.16964.4	609	612	3	2351.16	588.798	4	-1.4	0.18	0.68	23.11
AHIQLVYTTLEENLINEER-EDIKLPSSALIGHLK-a18-b4	sp|P53552|THO2_YEAST	sp|P53552|THO2_YEAST	intra-protein xl	aleitner_D1807_020.c.24991.24991.5_aleitner_D1807_020.c.24991.24991.5	1177	1182	5	3886.08	778.224	5	-0.8	0.31	0.49	23.05
NTISEAGDKLEQADK-DTVTK-a9-b1	sp|P10591|HSP71_YEAST	sp|P10591|HSP71_YEAST	intra-protein xl	aleitner_D1807_023.c.05988.05988.3_aleitner_D1807_023.c.05988.05988.3	556	563	7	2162.07	721.696	3	-2.1	0.28	0.9	22.9

## Sheet: 2.5 mM ADH
2.5 mM ADH cross-link high-resolution MS/MS
Id	Protein1	Protein2	XLType	Spectrum	AbsPos1	AbsPos2	deltaAA	Mr	Mz	z	Error_rel[ppm]	TIC	deltaS	ld-Score
LQGLYDSVQVINR-GVDAQIK-a6-b3	sp|P33441|MFT1_YEAST	sp|O13539|THP2_YEAST	inter-protein xl	aleitner_D2005_138.c.06155.06155.4_aleitner_D2005_138.c.06117.06117.4	129	171		2371.29	593.831	4	-1.2	0.45	0	38.35	high res
2.5 mM ADH cross-links low-resolution MS/MS
Id	Protein1	Protein2	XLType	Spectrum	AbsPos1	AbsPos2	deltaAA	Mr	Mz	z	Error_rel[ppm]	TIC	deltaS	ld-Score
ALEEEASFPER-GEISEENTK-a3-b2	sp|P17629|HPR1_YEAST	sp|P17629|HPR1_YEAST	intra-protein xl	aleitner_D2005_135.c.02336.02336.3_aleitner_D2005_135.c.02347.02347.3	654	692	38	2420.15	807.724	3	0.8	0.13	0.63	23.8	low res
SSDDLLTESLKK-LPDLHR-a8-b3	sp|O13539|THP2_YEAST	sp|O13539|THP2_YEAST	intra-protein xl	aleitner_D2005_135.c.03271.03271.4_aleitner_D2005_135.c.03285.03285.4	49	56	7	2222.2	556.558	4	-1.2	0.19	0.67	21.25

## Sheet: 2.5 mM DMTMM high res
2.5 mM DMTMM cross-links high-resolution MS/MS
Inter-subunit cross-links
Id	Protein1	Protein2	XLType	Spectrum	AbsPos1	AbsPos2	deltaAA	Mr	Mz	z	Error_rel[ppm]	TIC	deltaS	ld-Score
NYLDQIKMAR-EVEGLSEGR-a7-b1	sp|O13539|THP2_YEAST	sp|P33441|MFT1_YEAST	inter-protein xl	aleitner_D2005_136.c.09666.09666.4_aleitner_D2005_136.c.09666.09666.4	182	137		2207.1	552.783	4	-0.2	0.37	0	35.15
AKFGLENK-ELGTDLVK-a2-b1	sp|O13539|THP2_YEAST	sp|P33441|MFT1_YEAST	inter-protein xl	aleitner_D2005_140.c.05165.05165.4_aleitner_D2005_140.c.05165.05165.4	187	158		1760.96	441.249	4	-1.4	0.41	0	34.82
IDSLKSEINAPSESYPVDK-DAEIFGK-a5-b3	sp|O13539|THP2_YEAST	sp|P33441|MFT1_YEAST	inter-protein xl	aleitner_D2005_136.c.11725.11725.3_aleitner_D2005_136.c.11725.11725.3	240	232		2851.41	951.479	3	0	0.45	0	34.66
IYLFDVKK-SDIENVR-a7-b2	sp|P53851|TEX1_YEAST	sp|P33441|MFT1_YEAST	inter-protein xl	aleitner_D2005_138.c.08485.08485.4_aleitner_D2005_138.c.08485.08485.4	190	212		1837.99	460.506	4	0	0.43	0	34.63
SISEYYSTFEHLNR-DKLPDIKSIHSK-a4-b7	sp|O13539|THP2_YEAST	sp|P33441|MFT1_YEAST	inter-protein xl	aleitner_D2005_136.c.09797.09797.5_aleitner_D2005_136.c.09797.09797.5	102	111		3106.57	622.322	5	-0.6	0.34	0	34.36
NYLDQIKXAR-EVEGLSEGR-a7-b1	sp|O13539|THP2_YEAST	sp|P33441|MFT1_YEAST	inter-protein xl	aleitner_D2005_138.c.08364.08364.4_aleitner_D2005_138.c.08364.08364.4	182	137		2223.09	556.781	4	-0.5	0.33	0	34.33
VHYSEVDTPFNK-YDKYQTR-a7-b3	sp|P33441|MFT1_YEAST	sp|O13539|THP2_YEAST	inter-protein xl	aleitner_D2005_138.c.03827.03827.4_aleitner_D2005_138.c.03827.03827.4	21	72		2389.13	598.291	4	0.2	0.2	0	33.77
KFTFIK-WIDYVR-a1-b3	sp|P17629|HPR1_YEAST	sp|P53552|THO2_YEAST	inter-protein xl	aleitner_D2005_140.c.07340.07340.3_aleitner_D2005_140.c.07340.07340.3	517	575		1614.89	539.305	3	-0.1	0.37	0	33.5
TKVHYSEVDTPFNK-EAQLLEDTK-a2-b1	sp|P33441|MFT1_YEAST	sp|O13539|THP2_YEAST	inter-protein xl	aleitner_D2005_136.c.06629.06629.4_aleitner_D2005_136.c.06629.06629.4	14	77		2691.34	673.843	4	0.1	0.31	0	33.45
IPPPAFDETFKK-WIDYVR-a11-b3	sp|P17629|HPR1_YEAST	sp|P53552|THO2_YEAST	inter-protein xl	aleitner_D2005_138.c.10777.10777.4_aleitner_D2005_138.c.10777.10777.4	516	575		2221.16	556.297	4	-1.1	0.33	0	33.41
FLDLQSSIDTKK-EAQLLEDTK-a11-b1	sp|P33441|MFT1_YEAST	sp|O13539|THP2_YEAST	inter-protein xl	aleitner_D2005_136.c.10744.10744.3_aleitner_D2005_136.c.10744.10744.3	82	77		2421.26	808.095	3	-1.3	0.29	0.79	33.39
TKVHYSEVDTPFNK-GEISEENTK-a2-b2	sp|P33441|MFT1_YEAST	sp|P17629|HPR1_YEAST	inter-protein xl	aleitner_D2005_136.c.03876.03876.4_aleitner_D2005_136.c.03876.03876.4	14	692		2651.27	663.824	4	-1.9	0.26	0	33.35
EXELEEIK-KLQDAR-a3-b1	sp|P53552|THO2_YEAST	sp|P17629|HPR1_YEAST	inter-protein xl	aleitner_D2005_136.c.01910.01910.3_aleitner_D2005_136.c.01910.01910.3	1222	635		1746.88	583.302	3	0.3	0.16	0	33.24
EMELEEIK-KLQDAR-a3-b1	sp|P53552|THO2_YEAST	sp|P17629|HPR1_YEAST	inter-protein xl	aleitner_D2005_140.c.03019.03019.3_aleitner_D2005_140.c.03019.03019.3	1222	635		1730.89	577.97	3	0.2	0.15	0	33.19
EAQLLEDTKTGR-LENNDILNTVK-a9-b5	sp|O13539|THP2_YEAST	sp|P17629|HPR1_YEAST	inter-protein xl	aleitner_D2005_140.c.06787.06787.3_aleitner_D2005_140.c.06787.06787.3	85	192		2613.36	872.127	3	-0.8	0.31	0	32.82
ISEETNADIESK-FYKIKDPDFYR-a3-b3	sp|P53552|THO2_YEAST	sp|P17629|HPR1_YEAST	inter-protein xl	aleitner_D2005_136.c.07294.07294.4_aleitner_D2005_136.c.07294.07294.4	381	465		2807.37	702.849	4	0.2	0.31	0.86	32.4
IREMELEEIK-EYKIGK-a8-b3	sp|P53552|THO2_YEAST	sp|P17629|HPR1_YEAST	inter-protein xl	aleitner_D2005_138.c.04605.04605.3_aleitner_D2005_138.c.04605.04605.3	1225	643		2007.07	670.03	3	-2.1	0.28	0	32.17
LQNDPPKSVASGSAGLNSK-LQGLYDSVQVINR-a7-b6	sp|P53552|THO2_YEAST	sp|P33441|MFT1_YEAST	inter-protein xl	aleitner_D2005_136.c.07683.07683.4_aleitner_D2005_136.c.07683.07683.4	1260	129		3354.75	839.696	4	0.1	0.33	0	31.75
VKNTTTLQQHLIDGR-ISEETNADIESK-a2-b3	sp|P04517|POLG_TEV	sp|P53552|THO2_YEAST	inter-protein xl	aleitner_D2005_136.c.04525.04525.4_aleitner_D2005_136.c.04525.04525.4	2104	381		3039.54	760.893	4	-1.7	0.25	0	31.47
SASISALQESDNEWNR-KSNTQALPQGPK-a9-b1	sp|P17629|HPR1_YEAST	sp|P53552|THO2_YEAST	inter-protein xl	aleitner_D2005_136.c.06678.06678.4_aleitner_D2005_136.c.06678.06678.4	233	1576		3055.5	764.883	4	1.2	0.21	0	31.33
LSQDILPLK-KFTFIK-a4-b1	sp|P53552|THO2_YEAST	sp|P17629|HPR1_YEAST	inter-protein xl	aleitner_D2005_138.c.11347.11347.4_aleitner_D2005_138.c.11347.11347.4	624	517		1790.07	448.525	4	-1.1	0.17	0	31.32
VADENWETCQQETLAK-KLQDAR-a4-b1	sp|P33441|MFT1_YEAST	sp|P17629|HPR1_YEAST	inter-protein xl	aleitner_D2005_136.c.03975.03975.4_aleitner_D2005_136.c.03975.03975.4	87	635		2632.25	659.071	4	-0.8	0.25	0	31.05
IDNGILAHKPR-ELESINASMK-a9-b1	sp|P53552|THO2_YEAST	sp|P33441|MFT1_YEAST	inter-protein xl	aleitner_D2005_136.c.06122.06122.4_aleitner_D2005_136.c.06122.06122.4	482	201		2335.23	584.815	4	-1.2	0.25	0	30.19
LQGLYDSVQVINR-NKFQTQDYR-a6-b2	sp|P33441|MFT1_YEAST	sp|P53552|THO2_YEAST	inter-protein xl	aleitner_D2005_136.c.08870.08870.4_aleitner_D2005_136.c.08870.08870.4	129	1547		2684.37	672.099	4	-0.2	0.21	0	30.01
VKNTTTLQQHLIDGR-EVEGLSEGR-a2-b3	sp|P04517|POLG_TEV	sp|P33441|MFT1_YEAST	inter-protein xl	aleitner_D2005_136.c.05458.05458.4_aleitner_D2005_136.c.05458.05458.4	2104	139		2679.39	670.856	4	0	0.27	0	29.56
IPPPAFDETFKK-LSQDILPLK-a11-b4	sp|P17629|HPR1_YEAST	sp|P53552|THO2_YEAST	inter-protein xl	aleitner_D2005_136.c.13219.13219.4_aleitner_D2005_136.c.13219.13219.4	516	624		2396.33	600.091	4	-0.7	0.17	0	29.22
KLGGTTSDFSASSSVEEVK-ALEEEASFPER-a1-b4	sp|P33441|MFT1_YEAST	sp|P17629|HPR1_YEAST	inter-protein xl	aleitner_D2005_136.c.08483.08483.4_aleitner_D2005_136.c.08483.08483.4	374	655		3186.52	797.638	4	-0.1	0.24	0.72	29.12
LLQENDTTLVKTKELIK-EDIEKMVAEAEKFK-a14-b12	sp|P07149|FAS1_YEAST	sp|P10591|HSP71_YEAST,sp|P10592|HSP72_YEAST	inter-protein xl	aleitner_D2005_136.c.22334.22334.4_aleitner_D2005_136.c.22334.22334.4	121	521,521		3632.95	909.245	4	-2.2	0.2	0	28.59
QVEVSDPSVTVYEXDK-GPKELESINASMK-a3-b3	sp|O13539|THP2_YEAST	sp|P33441|MFT1_YEAST	inter-protein xl	aleitner_D2005_136.c.09295.09295.4_aleitner_D2005_136.c.09295.09295.4	133	200		3225.53	807.391	4	-2.9	0.27	0	27.71
VKNTTTLQQHLIDGR-AISLVENDDETR-a2-b6	sp|P04517|POLG_TEV	sp|P53552|THO2_YEAST	inter-protein xl	aleitner_D2005_136.c.07708.07708.4_aleitner_D2005_136.c.07708.07708.4	2104	1322		3065.57	767.401	4	-0.6	0.17	0	27.44
KPEGVYEAAQAKWESK-QDNPPPEAAK-a12-b7	sp|P17629|HPR1_YEAST	sp|P25555|GBP2_YEAST	inter-protein xl	aleitner_D2005_136.c.05275.05275.4_aleitner_D2005_136.c.05275.05275.4	558	201		2867.4	717.859	4	-2.2	0.19	0.7	27.13
Ambiguous inter-/intra-subunit cross-link
Id	Protein1	Protein2	XLType	Spectrum	AbsPos1	AbsPos2	deltaAA	Mr	Mz	z	Error_rel[ppm]	TIC	deltaS	ld-Score
LEQADKDAVTK-NTISEAGDK-a6-b5	sp|P10592|HSP72_YEAST	sp|P10591|HSP71_YEAST,sp|P10592|HSP72_YEAST	intra/inter xl	aleitner_D2005_136.c.05999.05999.3_aleitner_D2005_136.c.05999.05999.3	562	552,552		2132.06	711.695	3	0.6	0.27	0	27.48
Intra-subunit cross-links
Id	Protein1	Protein2	XLType	Spectrum	AbsPos1	AbsPos2	deltaAA	Mr	Mz	z	Error_rel[ppm]	TIC	deltaS	ld-Score
EAQLLEDTK-YDKYQTR-a1-b3	sp|O13539|THP2_YEAST	sp|O13539|THP2_YEAST	intra-protein xl	aleitner_D2005_136.c.03179.03179.4_aleitner_D2005_136.c.03179.03179.4	77	72	5	1999.98	501.004	4	-0.4	0.5	0	36.43
TGVDGLFEEPR-KVEALDDSFK-a4-b1	sp|P17629|HPR1_YEAST	sp|P17629|HPR1_YEAST	intra-protein xl	aleitner_D2005_136.c.10946.10946.4_aleitner_D2005_136.c.10946.10946.4	604	612	8	2351.16	588.798	4	-1.3	0.51	0	36.24
ALEEEASFPER-KLQDAR-a5-b1	sp|P17629|HPR1_YEAST	sp|P17629|HPR1_YEAST	intra-protein xl	aleitner_D2005_136.c.03196.03196.4_aleitner_D2005_136.c.03196.03196.4	656	635	21	1987.99	498.007	4	-0.7	0.48	0	35.66
TGVDGLFEEPR-KVEALDDSFK-a8-b1	sp|P17629|HPR1_YEAST	sp|P17629|HPR1_YEAST	intra-protein xl	aleitner_D2005_138.c.11197.11197.4_aleitner_D2005_138.c.11197.11197.4	608	612	4	2351.16	588.799	4	0	0.45	0	35.63
TGVDGLFEEPR-KLQDAR-a8-b1	sp|P17629|HPR1_YEAST	sp|P17629|HPR1_YEAST	intra-protein xl	aleitner_D2005_136.c.06617.06617.4_aleitner_D2005_136.c.06617.06617.4	608	635	27	1929.99	483.505	4	-0.1	0.34	0	35.45
GPKELESINASMK-IYDDFSK-a3-b3	sp|P33441|MFT1_YEAST	sp|P33441|MFT1_YEAST	intra-protein xl	aleitner_D2005_136.c.07750.07750.4_aleitner_D2005_136.c.07750.07750.4	200	193	7	2271.11	568.784	4	-1.2	0.35	0.73	35.27
NKFQTQDYR-DETIR-a2-b2	sp|P53552|THO2_YEAST	sp|P53552|THO2_YEAST	intra-protein xl	aleitner_D2005_138.c.03351.03351.3_aleitner_D2005_138.c.03351.03351.3	1547	1542	5	1812.87	605.299	3	-1.5	0.47	0	35.25
KLQDAR-DEIIR-a1-b2	sp|P17629|HPR1_YEAST	sp|P17629|HPR1_YEAST	intra-protein xl	aleitner_D2005_138.c.01066.01066.3_aleitner_D2005_138.c.01066.01066.3	635	575	60	1355.75	452.925	3	-1.2	0.38	0	35.22
EVKVNVEGLPR-VNVEGLPR-a3-b4	sp|Q12159|YRA1_YEAST	sp|Q12159|YRA1_YEAST	intra-protein xl	aleitner_D2005_136.c.08430.08430.4_aleitner_D2005_136.c.08430.08430.4	79	83	4	2103.18	526.802	4	-1.3	0.39	0	35.12
DIKQDAVR-VNVEGLPR-a3-b4	sp|Q12159|YRA1_YEAST	sp|Q12159|YRA1_YEAST	intra-protein xl	aleitner_D2005_138.c.04672.04672.4_aleitner_D2005_138.c.04672.04672.4	90	83	7	1807.99	453.005	4	-0.5	0.31	0	35.12
EVEGLSEGR-SIHSKLLLR-a1-b5	sp|P33441|MFT1_YEAST	sp|P33441|MFT1_YEAST	intra-protein xl	aleitner_D2005_136.c.04459.04459.4_aleitner_D2005_136.c.04459.04459.4	137	116	21	2022.12	506.538	4	-0.2	0.38	0	35.09
AFKDFEK-GIDIER-a3-b3	sp|Q07478|SUB2_YEAST	sp|Q07478|SUB2_YEAST	intra-protein xl	aleitner_D2005_138.c.04686.04686.4_aleitner_D2005_138.c.04686.04686.4	353	371	18	1566.8	392.708	4	-1	0.46	0	35.02
WESKISSETSGGEAKDEIIR-TGVDGLFEEPR-a4-b4	sp|P17629|HPR1_YEAST	sp|P17629|HPR1_YEAST	intra-protein xl	aleitner_D2005_136.c.10391.10391.4_aleitner_D2005_136.c.10391.10391.4	562	604	42	3421.66	856.424	4	0	0.37	0.75	34.91
EMELEEIK-KQLELNK-a3-b1	sp|P53552|THO2_YEAST	sp|P53552|THO2_YEAST	intra-protein xl	aleitner_D2005_138.c.06060.06060.4_aleitner_D2005_138.c.06060.06060.4	1222	1244	22	1872.98	469.253	4	-2.9	0.29	0	34.79
ALEEEASFPER-IKSQR-a4-b2	sp|P17629|HPR1_YEAST	sp|P17629|HPR1_YEAST	intra-protein xl	aleitner_D2005_136.c.02133.02133.3_aleitner_D2005_136.c.02133.02133.3	655	667	12	1888.97	630.663	3	0.7	0.45	0	34.75
ALEEEASFPER-IKSQR-a5-b2	sp|P17629|HPR1_YEAST	sp|P17629|HPR1_YEAST	intra-protein xl	aleitner_D2005_138.c.02393.02393.3_aleitner_D2005_138.c.02393.02393.3	656	667	11	1888.97	630.663	3	1	0.46	0	34.73
KPEGVYEAAQAK-IEQEVK-a1-b4	sp|P17629|HPR1_YEAST	sp|P17629|HPR1_YEAST	intra-protein xl	aleitner_D2005_136.c.01781.01781.3_aleitner_D2005_136.c.01781.01781.3	547	544	3	2016.05	673.025	3	-1.2	0.36	0	34.71
SSDDLLTESLK-KLPDLHR-a8-b1	sp|O13539|THP2_YEAST	sp|O13539|THP2_YEAST	intra-protein xl	aleitner_D2005_136.c.07479.07479.3_aleitner_D2005_136.c.07479.07479.3	49	53	4	2066.1	689.708	3	-0.7	0.49	0	34.66
VKNTTTLQQHLIDGR-LNADSVLWGGHK-a2-b4	sp|P04517|POLG_TEV	sp|P04517|POLG_TEV	intra-protein xl	aleitner_D2005_136.c.07680.07680.4_aleitner_D2005_136.c.07680.07680.4	2104	2244	140	3000.59	751.156	4	0.6	0.35	0	34.6
EFFASQVGGVQR-VAKLLDTTR-a1-b3	sp|Q12159|YRA1_YEAST	sp|Q12159|YRA1_YEAST	intra-protein xl	aleitner_D2005_136.c.08449.08449.3_aleitner_D2005_136.c.08449.08449.3	96	70	26	2321.25	774.757	3	-0.9	0.34	0	34.54
ELESINASMK-FLIEKNYLK-a1-b5	sp|P33441|MFT1_YEAST	sp|P33441|MFT1_YEAST	intra-protein xl	aleitner_D2005_136.c.11130.11130.4_aleitner_D2005_136.c.11130.11130.4	201	170	31	2269.21	568.309	4	1.3	0.33	0	34.5
ITSIFKEELLK-DAEIFGK-a6-b3	sp|P33441|MFT1_YEAST	sp|P33441|MFT1_YEAST	intra-protein xl	aleitner_D2005_136.c.14998.14998.4_aleitner_D2005_136.c.14998.14998.4	242	232	10	2080.14	521.044	4	-1.1	0.34	0.85	34.41
ALEEEASFPER-IKSQR-a3-b2	sp|P17629|HPR1_YEAST	sp|P17629|HPR1_YEAST	intra-protein xl	aleitner_D2005_136.c.02286.02286.3_aleitner_D2005_136.c.02286.02286.3	654	667	13	1888.96	630.662	3	-0.3	0.4	0	34.4
TGVDGLFEEPR-KLQDAR-a4-b1	sp|P17629|HPR1_YEAST	sp|P17629|HPR1_YEAST	intra-protein xl	aleitner_D2005_138.c.05095.05095.4_aleitner_D2005_138.c.05095.05095.4	604	635	31	1929.99	483.505	4	-1.5	0.24	0	34.3
ELINSSIR-KLPDLHR-a1-b1	sp|O13539|THP2_YEAST	sp|O13539|THP2_YEAST	intra-protein xl	aleitner_D2005_138.c.04069.04069.4_aleitner_D2005_138.c.04069.04069.4	60	53	7	1790.01	448.511	4	-1.7	0.29	0	34.13
ISSETSGGEAKDEIIR-VNEKTGVDGLFEEPR-a4-b4	sp|P17629|HPR1_YEAST	sp|P17629|HPR1_YEAST	intra-protein xl	aleitner_D2005_136.c.07696.07696.4_aleitner_D2005_136.c.07696.07696.4	566	600	34	3361.67	841.425	4	1.5	0.38	0	34.09
LNADSVLWGGHK-MPKDFPPFPQK-a4-b3	sp|P04517|POLG_TEV	sp|P04517|POLG_TEV	intra-protein xl	aleitner_D2005_136.c.11947.11947.4_aleitner_D2005_136.c.11947.11947.4	2244	2126	118	2608.32	653.088	4	-2.4	0.34	0	33.99
KVEALDDSFK-YLFDFDK-a1-b4	sp|P17629|HPR1_YEAST	sp|P17629|HPR1_YEAST	intra-protein xl	aleitner_D2005_136.c.13693.13693.3_aleitner_D2005_136.c.13693.13693.3	612	593	19	2079.02	694.014	3	-0.7	0.32	0	33.98
KVEALDDSFKEK-TGVDGLFEEPR-a10-b4	sp|P17629|HPR1_YEAST	sp|P17629|HPR1_YEAST	intra-protein xl	aleitner_D2005_136.c.09316.09316.4_aleitner_D2005_136.c.09316.09316.4	621	604	17	2608.3	653.084	4	0.6	0.34	0	33.93
FLIEKNYLK-SDIENVR-a5-b2	sp|P33441|MFT1_YEAST	sp|P33441|MFT1_YEAST	intra-protein xl	aleitner_D2005_136.c.08307.08307.4_aleitner_D2005_136.c.08307.08307.4	170	212	42	1980.07	496.024	4	-1.1	0.35	0	33.93
NSTLEIFER-YIKNISR-a5-b3	sp|P53552|THO2_YEAST	sp|P53552|THO2_YEAST	intra-protein xl	aleitner_D2005_136.c.07602.07602.4_aleitner_D2005_136.c.07602.07602.4	1349	1379	30	1982.06	496.522	4	-0.5	0.35	0	33.88
LQNDPPKSVASGSAGLNSK-NEPVIPTKPSSSQWSYSK-a7-b2	sp|P53552|THO2_YEAST	sp|P53552|THO2_YEAST	intra-protein xl	aleitner_D2005_136.c.06498.06498.5_aleitner_D2005_136.c.06498.06498.5	1260	1281	21	3884.95	777.999	5	0.1	0.35	0.83	33.85
AISLVENDDETR-LSKQNMPIFDFR-a6-b3	sp|P53552|THO2_YEAST	sp|P53552|THO2_YEAST	intra-protein xl	aleitner_D2005_136.c.15457.15457.3_aleitner_D2005_136.c.15457.15457.3	1322	1335	13	2837.4	946.808	3	-0.8	0.3	0	33.81
TGVDGLFEEPR-YLFDFDKVNEK-a4-b7	sp|P17629|HPR1_YEAST	sp|P17629|HPR1_YEAST	intra-protein xl	aleitner_D2005_136.c.17279.17279.4_aleitner_D2005_136.c.17279.17279.4	604	596	8	2617.27	655.325	4	-0.6	0.46	0.7	33.75
IPPPAFDETFK-KFTFIK-a8-b1	sp|P17629|HPR1_YEAST	sp|P17629|HPR1_YEAST	intra-protein xl	aleitner_D2005_136.c.12454.12454.4_aleitner_D2005_136.c.12454.12454.4	513	517	4	2025.09	507.281	4	-1.5	0.21	0	33.74
FIIDSXTNAIEDEEENNLEK-TFKALPVSFDSIR-a13-b3	sp|P17629|HPR1_YEAST	sp|P17629|HPR1_YEAST	intra-protein xl	aleitner_D2005_138.c.15835.15835.4_aleitner_D2005_138.c.15835.15835.4	84	20	64	3830.86	958.721	4	-0.3	0.3	0	33.7
KLSKQNMPIFDFR-AISLVENDDETR-a4-b6	sp|P53552|THO2_YEAST	sp|P53552|THO2_YEAST	intra-protein xl	aleitner_D2005_136.c.13215.13215.4_aleitner_D2005_136.c.13215.13215.4	1335	1322	13	2965.5	742.383	4	1.2	0.29	0	33.7
ISSETSGGEAKDEIIR-KPEGVYEAAQAKWESK-a4-b12	sp|P17629|HPR1_YEAST	sp|P17629|HPR1_YEAST	intra-protein xl	aleitner_D2005_136.c.07014.07014.5_aleitner_D2005_136.c.07014.07014.5	566	558	8	3492.74	699.556	5	1.3	0.29	0.84	33.7
VTKLTGSIINGTLSNDDSK-LTEQNISQLK-a3-b3	sp|P33441|MFT1_YEAST	sp|P33441|MFT1_YEAST	intra-protein xl	aleitner_D2005_136.c.09792.09792.3_aleitner_D2005_136.c.09792.09792.3	36	58	22	3116.65	1039.89	3	-1.8	0.42	0	33.69
EVEGLSEGR-LVDPGLKK-a1-b7	sp|P33441|MFT1_YEAST	sp|P33441|MFT1_YEAST	intra-protein xl	aleitner_D2005_138.c.03911.03911.4_aleitner_D2005_138.c.03911.03911.4	137	181	44	1824.99	457.256	4	-0.8	0.21	0	33.67
KNALSGENTGHMSNR-SLYDER-a1-b5	sp|P53552|THO2_YEAST	sp|P53552|THO2_YEAST	intra-protein xl	aleitner_D2005_136.c.02054.02054.4_aleitner_D2005_136.c.02054.02054.4	967	965	2	2378.11	595.534	4	0.6	0.3	0	33.65
MPKDFPPFPQK-FREPQREER-a3-b8	sp|P04517|POLG_TEV	sp|P04517|POLG_TEV	intra-protein xl	aleitner_D2005_136.c.04380.04380.4_aleitner_D2005_136.c.04380.04380.4	2126	2144	18	2558.29	640.58	4	0.7	0.31	0	33.55
IGKLQGLYDSVQVINR-ELGTDLVK-a3-b1	sp|P33441|MFT1_YEAST	sp|P33441|MFT1_YEAST	intra-protein xl	aleitner_D2005_136.c.15374.15374.3_aleitner_D2005_136.c.15374.15374.3	123	158	35	2657.48	886.834	3	1.3	0.35	0	33.55
IPTGLDKIEQEVK-KPEGVYEAAQAK-a11-b1	sp|P17629|HPR1_YEAST	sp|P17629|HPR1_YEAST	intra-protein xl	aleitner_D2005_136.c.10299.10299.3_aleitner_D2005_136.c.10299.10299.3	544	547	3	2740.47	914.496	3	0.3	0.36	0	33.53
ISEETNADIESK-QKTQQDILLFGK-a4-b2	sp|P53552|THO2_YEAST	sp|P53552|THO2_YEAST	intra-protein xl	aleitner_D2005_136.c.08297.08297.4_aleitner_D2005_136.c.08297.08297.4	382	394	12	2734.4	684.609	4	0.5	0.2	0	33.51
VAKLLDTTR-VNVEGLPR-a3-b4	sp|Q12159|YRA1_YEAST	sp|Q12159|YRA1_YEAST	intra-protein xl	aleitner_D2005_138.c.06069.06069.3_aleitner_D2005_138.c.06069.06069.3	70	83	13	1880.08	627.701	3	-2.6	0.22	0	33.51
AISLVENDDETR-LSKQNXPIFDFR-a6-b3	sp|P53552|THO2_YEAST	sp|P53552|THO2_YEAST	intra-protein xl	aleitner_D2005_136.c.12321.12321.4_aleitner_D2005_136.c.12321.12321.4	1322	1335	13	2853.39	714.356	4	-1.4	0.32	0	33.49
DKLPDIKSIHSK-EVEGLSEGR-a7-b1	sp|P33441|MFT1_YEAST	sp|P33441|MFT1_YEAST	intra-protein xl	aleitner_D2005_136.c.03957.03957.4_aleitner_D2005_136.c.03957.03957.4	111	137	26	2336.23	585.065	4	-1.6	0.25	0	33.48
KVEALDDSFKEK-YLFDFDK-a10-b4	sp|P17629|HPR1_YEAST	sp|P17629|HPR1_YEAST	intra-protein xl	aleitner_D2005_136.c.11066.11066.4_aleitner_D2005_136.c.11066.11066.4	621	593	28	2336.16	585.047	4	0.2	0.42	0	33.41
LQNDPPKSVASGSAGLNSK-AISLVENDDETR-a7-b6	sp|P53552|THO2_YEAST	sp|P53552|THO2_YEAST	intra-protein xl	aleitner_D2005_136.c.06587.06587.4_aleitner_D2005_136.c.06587.06587.4	1260	1322	62	3211.59	803.906	4	-0.8	0.35	0	33.41
LQGLYDSVQVINR-SIHSKLLLR-a6-b5	sp|P33441|MFT1_YEAST	sp|P33441|MFT1_YEAST	intra-protein xl	aleitner_D2005_136.c.09467.09467.4_aleitner_D2005_136.c.09467.09467.4	129	116	13	2551.46	638.873	4	-0.2	0.26	0	33.39
IGKLQGLYDSVQVINR-EVEGLSEGR-a3-b1	sp|P33441|MFT1_YEAST	sp|P33441|MFT1_YEAST	intra-protein xl	aleitner_D2005_136.c.13311.13311.4_aleitner_D2005_136.c.13311.13311.4	123	137	14	2758.46	690.622	4	-1	0.44	0	33.32
SSDDLLTESLKK-ELINSSIR-a11-b1	sp|O13539|THP2_YEAST	sp|O13539|THP2_YEAST	intra-protein xl	aleitner_D2005_138.c.09461.09461.3_aleitner_D2005_138.c.09461.09461.3	52	60	8	2247.2	750.073	3	0.1	0.28	0	33.31
EAQLLEDTK-YINLLKR-a1-b6	sp|O13539|THP2_YEAST	sp|O13539|THP2_YEAST	intra-protein xl	aleitner_D2005_138.c.08401.08401.3_aleitner_D2005_138.c.08401.08401.3	77	122	45	1946.08	649.701	3	-1.6	0.17	0	33.3
KVEALDDSFKEK-TGVDGLFEEPR-a10-b9	sp|P17629|HPR1_YEAST	sp|P17629|HPR1_YEAST	intra-protein xl	aleitner_D2005_138.c.09137.09137.3_aleitner_D2005_138.c.09137.09137.3	621	609	12	2608.3	870.441	3	-0.8	0.34	0	33.28
VNEKTGVDGLFEEPR-KVEALDDSFK-a4-b3	sp|P17629|HPR1_YEAST	sp|P17629|HPR1_YEAST	intra-protein xl	aleitner_D2005_136.c.09809.09809.4_aleitner_D2005_136.c.09809.09809.4	600	614	14	2821.41	706.361	4	0.3	0.44	0	33.25
ITSIFKEELLKR-DAEIFGK-a6-b3	sp|P33441|MFT1_YEAST	sp|P33441|MFT1_YEAST	intra-protein xl	aleitner_D2005_136.c.12383.12383.3_aleitner_D2005_136.c.12383.12383.3	242	232	10	2236.25	746.423	3	-0.1	0.35	0	33.25
LSKQNXPIFDFR-NSTLEIFER-a3-b5	sp|P53552|THO2_YEAST	sp|P53552|THO2_YEAST	intra-protein xl	aleitner_D2005_138.c.13434.13434.4_aleitner_D2005_138.c.13434.13434.4	1335	1349	14	2600.3	651.084	4	-0.2	0.28	0	33.25
LTEQNISQLK-YLDILGKVTK-a3-b7	sp|P33441|MFT1_YEAST	sp|P33441|MFT1_YEAST	intra-protein xl	aleitner_D2005_136.c.12522.12522.4_aleitner_D2005_136.c.12522.12522.4	58	33	25	2303.31	576.835	4	0.1	0.31	0	33.25
FPEKPFQEGK-LREEYKK-a3-b6	sp|P53552|THO2_YEAST	sp|P53552|THO2_YEAST	intra-protein xl	aleitner_D2005_136.c.01305.01305.4_aleitner_D2005_136.c.01305.01305.4	1502	1489	13	2152.13	539.04	4	-0.8	0.21	0	33.21
KPEGVYEAAQAKWESK-ISSETSGGEAK-a12-b4	sp|P17629|HPR1_YEAST	sp|P17629|HPR1_YEAST	intra-protein xl	aleitner_D2005_136.c.05233.05233.4_aleitner_D2005_136.c.05233.05233.4	558	566	8	2866.4	717.608	4	0.5	0.3	0	33.18
EAQLLEDTK-YDKYQTR-a6-b3	sp|O13539|THP2_YEAST	sp|O13539|THP2_YEAST	intra-protein xl	aleitner_D2005_136.c.03045.03045.3_aleitner_D2005_136.c.03045.03045.3	82	72	10	1999.98	667.669	3	-1.5	0.24	0	33.05
TGVDGLFEEPR-YLFDFDKVNEK-a9-b7	sp|P17629|HPR1_YEAST	sp|P17629|HPR1_YEAST	intra-protein xl	aleitner_D2005_136.c.17571.17571.4_aleitner_D2005_136.c.17571.17571.4	609	596	13	2617.27	655.324	4	-1.7	0.41	0	33.05
ISSETSGGEAKDEIIR-KLQDAR-a4-b1	sp|P17629|HPR1_YEAST	sp|P17629|HPR1_YEAST	intra-protein xl	aleitner_D2005_138.c.01213.01213.4_aleitner_D2005_138.c.01213.01213.4	566	635	69	2402.24	601.567	4	-0.8	0.25	0	33.04
TKVHYSEVDTPFNK-LTEQNISQLK-a2-b3	sp|P33441|MFT1_YEAST	sp|P33441|MFT1_YEAST	intra-protein xl	aleitner_D2005_136.c.06539.06539.4_aleitner_D2005_136.c.06539.06539.4	14	58	44	2818.45	705.62	4	-0.7	0.25	0	33.03
EAQLLEDTKTGR-DVAAGVQNPK-a9-b1	sp|O13539|THP2_YEAST	sp|O13539|THP2_YEAST	intra-protein xl	aleitner_D2005_136.c.03838.03838.3_aleitner_D2005_136.c.03838.03838.3	85	89	4	2339.21	780.744	3	0	0.35	0	32.97
NYLKLVDPGLKK-EVEGLSEGR-a4-b1	sp|P33441|MFT1_YEAST	sp|P33441|MFT1_YEAST	intra-protein xl	aleitner_D2005_136.c.07401.07401.4_aleitner_D2005_136.c.07401.07401.4	174	137	37	2343.28	586.827	4	-0.7	0.41	0	32.94
FTTAKIDGFK-LXSSDEK-a5-b6	sp|P17629|HPR1_YEAST	sp|P17629|HPR1_YEAST	intra-protein xl	aleitner_D2005_138.c.04406.04406.3_aleitner_D2005_138.c.04406.04406.3	489	483	6	1932.95	645.324	3	-0.6	0.29	0	32.93
FIIDSXTNAIEDEEENNLEK-TFKALPVSFDSIR-a11-b3	sp|P17629|HPR1_YEAST	sp|P17629|HPR1_YEAST	intra-protein xl	aleitner_D2005_136.c.17548.17548.4_aleitner_D2005_136.c.17548.17548.4	82	20	62	3830.85	958.721	4	-0.5	0.3	0	32.87
KVEALDDSFKEK-TGVDGLFEEPR-a1-b8	sp|P17629|HPR1_YEAST	sp|P17629|HPR1_YEAST	intra-protein xl	aleitner_D2005_136.c.09675.09675.4_aleitner_D2005_136.c.09675.09675.4	612	608	4	2608.3	653.083	4	-0.6	0.37	0.83	32.82
KPEGVYEAAQAK-KFTFIK-a7-b1	sp|P17629|HPR1_YEAST	sp|P17629|HPR1_YEAST	intra-protein xl	aleitner_D2005_136.c.04034.04034.4_aleitner_D2005_136.c.04034.04034.4	553	517	36	2054.12	514.537	4	-0.7	0.26	0	32.79
LVDPGLKK-DSSEER-a7-b4	sp|P33441|MFT1_YEAST	sp|P33441|MFT1_YEAST	intra-protein xl	aleitner_D2005_140.c.01023.01023.4_aleitner_D2005_140.c.01023.01023.4	181	186	5	1571.81	393.961	4	-1.4	0.26	0	32.78
LSKQNMPIFDFR-NSTLEIFER-a3-b5	sp|P53552|THO2_YEAST	sp|P53552|THO2_YEAST	intra-protein xl	aleitner_D2005_138.c.15690.15690.4_aleitner_D2005_138.c.15690.15690.4	1335	1349	14	2584.31	647.085	4	-0.3	0.21	0	32.68
ISSETSGGEAKDEIIR-LLYKINQEHR-a4-b4	sp|P17629|HPR1_YEAST	sp|P17629|HPR1_YEAST	intra-protein xl	aleitner_D2005_136.c.03655.03655.4_aleitner_D2005_136.c.03655.03655.4	566	627	61	2985.55	747.395	4	-1.4	0.19	0	32.65
TGVDGLFEEPR-YLFDFDKVNEK-a8-b7	sp|P17629|HPR1_YEAST	sp|P17629|HPR1_YEAST	intra-protein xl	aleitner_D2005_136.c.17267.17267.3_aleitner_D2005_136.c.17267.17267.3	608	596	12	2617.27	873.43	3	-1.4	0.41	0	32.61
SISEYYSTFEHLNR-YINLLKR-a4-b6	sp|O13539|THP2_YEAST	sp|O13539|THP2_YEAST	intra-protein xl	aleitner_D2005_136.c.13437.13437.4_aleitner_D2005_136.c.13437.13437.4	102	122	20	2645.36	662.348	4	0	0.28	0	32.6
INSASQTEGDELKSEQTQPK-ALEEEASFPER-a13-b5	sp|P17629|HPR1_YEAST	sp|P17629|HPR1_YEAST	intra-protein xl	aleitner_D2005_136.c.05988.05988.4_aleitner_D2005_136.c.05988.05988.4	683	656	27	3447.63	862.914	4	-0.5	0.28	0	32.53
ISSETSGGEAKDEIIR-KPEGVYEAAQAK-a9-b1	sp|P17629|HPR1_YEAST	sp|P17629|HPR1_YEAST	intra-protein xl	aleitner_D2005_136.c.03172.03172.4_aleitner_D2005_136.c.03172.03172.4	571	547	24	2962.49	741.63	4	-0.2	0.37	0	32.44
EFFASQVGGVQR-DIKQDAVR-a1-b3	sp|Q12159|YRA1_YEAST	sp|Q12159|YRA1_YEAST	intra-protein xl	aleitner_D2005_138.c.07214.07214.3_aleitner_D2005_138.c.07214.07214.3	96	90	6	2249.15	750.726	3	-0.6	0.21	0	32.37
VHYSEVDTPFNKYLDILGK-FLDLQSSIDTK-a12-b3	sp|P33441|MFT1_YEAST	sp|P33441|MFT1_YEAST	intra-protein xl	aleitner_D2005_136.c.19685.19685.4_aleitner_D2005_136.c.19685.19685.4	26	74	48	3484.78	872.204	4	2.4	0.16	0	32.2
KVEALDDSFK-LLYKINQEHR-a3-b4	sp|P17629|HPR1_YEAST	sp|P17629|HPR1_YEAST	intra-protein xl	aleitner_D2005_136.c.04669.04669.4_aleitner_D2005_136.c.04669.04669.4	614	627	13	2445.3	612.333	4	-1.1	0.2	0	32.08
VKNTTTLQQHLIDGR-NTTTLQQHLIDGR-a2-b11	sp|P04517|POLG_TEV	sp|P04517|POLG_TEV	intra-protein xl	aleitner_D2005_136.c.06639.06639.4_aleitner_D2005_136.c.06639.06639.4	2104	2115	11	3200.7	801.183	4	-0.6	0.26	0	32.05
DHDGDYKDDDDK-GENLYFQ-a7-b2	sp|P17629|HPR1_YEAST	sp|P17629|HPR1_YEAST	intra-protein xl	aleitner_D2005_136.c.05914.05914.3_aleitner_D2005_136.c.05914.05914.3	759	766	7	2287.92	763.647	3	0.9	0.27	0.77	32.05
ISSETSGGEAKDEIIR-KVEALDDSFKEK-a4-b10	sp|P17629|HPR1_YEAST	sp|P17629|HPR1_YEAST	intra-protein xl	aleitner_D2005_136.c.03964.03964.5_aleitner_D2005_136.c.03964.03964.5	566	621	55	3080.55	617.118	5	0	0.19	0.59	32.02
TGVDGLFEEPR-KVEALDDSFK-a9-b1	sp|P17629|HPR1_YEAST	sp|P17629|HPR1_YEAST	intra-protein xl	aleitner_D2005_138.c.11344.11344.3_aleitner_D2005_138.c.11344.11344.3	609	612	3	2351.17	784.731	3	2	0.24	0	32.02
VHYSEVDTPFNK-YLDILGKVTK-a7-b7	sp|P33441|MFT1_YEAST	sp|P33441|MFT1_YEAST	intra-protein xl	aleitner_D2005_136.c.11873.11873.4_aleitner_D2005_136.c.11873.11873.4	21	33	12	2565.35	642.344	4	-0.6	0.23	0	32.01
AFKDFEKR-GIDIER-a3-b5	sp|Q07478|SUB2_YEAST	sp|Q07478|SUB2_YEAST	intra-protein xl	aleitner_D2005_136.c.04012.04012.4_aleitner_D2005_136.c.04012.04012.4	353	373	20	1722.9	431.734	4	-1.4	0.25	0	31.99
AHIQLVYTTLEENLINEER-EDIKLPSSALIGHLK-a17-b4	sp|P53552|THO2_YEAST	sp|P53552|THO2_YEAST	intra-protein xl	aleitner_D2005_136.c.19327.19327.4_aleitner_D2005_136.c.19327.19327.4	1176	1182	6	3886.08	972.528	4	-1.2	0.25	0	31.9
KLXSSDEKFTTAK-EFQNFR-a8-b1	sp|P17629|HPR1_YEAST	sp|P17629|HPR1_YEAST	intra-protein xl	aleitner_D2005_136.c.03440.03440.4_aleitner_D2005_136.c.03440.03440.4	484	495	11	2322.13	581.541	4	0.5	0.17	0	31.83
GKQKTQQDILLFGK-ISEETNADIESK-a4-b4	sp|P53552|THO2_YEAST	sp|P53552|THO2_YEAST	intra-protein xl	aleitner_D2005_136.c.06410.06410.4_aleitner_D2005_136.c.06410.06410.4	394	382	12	2919.52	730.888	4	0.3	0.21	0.9	31.81
LTGSIINGTLSNDDSK-IEKLTEQNISQLK-a14-b3	sp|P33441|MFT1_YEAST	sp|P33441|MFT1_YEAST	intra-protein xl	aleitner_D2005_136.c.11348.11348.3_aleitner_D2005_136.c.11348.11348.3	50	55	5	3158.67	1053.9	3	0.1	0.34	0	31.71
FPEKPFQEGKDSSK-DSPSENEEKPNKR-a10-b5	sp|P53552|THO2_YEAST	sp|P53552|THO2_YEAST	intra-protein xl	aleitner_D2005_136.c.00971.00971.4_aleitner_D2005_136.c.00971.00971.4	1509	1529	20	3133.49	784.381	4	-0.4	0.21	0.79	31.65
FIIDSMTNAIEDEEENNLEK-TFKALPVSFDSIR-a15-b3	sp|P17629|HPR1_YEAST	sp|P17629|HPR1_YEAST	intra-protein xl	aleitner_D2005_136.c.21814.21814.3_aleitner_D2005_136.c.21814.21814.3	86	20	66	3814.86	1272.63	3	-0.8	0.44	0	31.56
ELESINASMK-IYDDFSKGPK-a3-b7	sp|P33441|MFT1_YEAST	sp|P33441|MFT1_YEAST	intra-protein xl	aleitner_D2005_136.c.07186.07186.4_aleitner_D2005_136.c.07186.07186.4	203	197	6	2271.11	568.785	4	-0.9	0.22	0	31.53
NYLKLVDPGLKK-DSSEER-a4-b1	sp|P33441|MFT1_YEAST	sp|P33441|MFT1_YEAST	intra-protein xl	aleitner_D2005_138.c.04555.04555.4_aleitner_D2005_138.c.04555.04555.4	174	183	9	2090.1	523.533	4	-0.6	0.28	0.88	31.35
SILKALSIDTIAK-ISEETNADIESK-a4-b4	sp|P53552|THO2_YEAST	sp|P53552|THO2_YEAST	intra-protein xl	aleitner_D2005_136.c.11939.11939.4_aleitner_D2005_136.c.11939.11939.4	644	382	262	2688.44	673.118	4	-1	0.17	0	31.1
VKNTTTLQQHLIDGR-DFPPFPQK-a2-b1	sp|P04517|POLG_TEV	sp|P04517|POLG_TEV	intra-protein xl	aleitner_D2005_138.c.08043.08043.4_aleitner_D2005_138.c.08043.08043.4	2104	2127	23	2679.41	670.862	4	0.6	0.29	0	31.05
EMELEEIK-KQLELNK-a5-b1	sp|P53552|THO2_YEAST	sp|P53552|THO2_YEAST	intra-protein xl	aleitner_D2005_138.c.06454.06454.3_aleitner_D2005_138.c.06454.06454.3	1224	1244	20	1872.98	625.336	3	-0.8	0.15	0	30.97
DKLPDIKSIHSK-EVEGLSEGR-a7-b7	sp|P33441|MFT1_YEAST	sp|P33441|MFT1_YEAST	intra-protein xl	aleitner_D2005_136.c.04211.04211.4_aleitner_D2005_136.c.04211.04211.4	111	143	32	2336.23	585.066	4	-0.3	0.21	0.87	30.9
MPKDFPPFPQK-FREPQREER-a3-b7	sp|P04517|POLG_TEV	sp|P04517|POLG_TEV	intra-protein xl	aleitner_D2005_136.c.04853.04853.4_aleitner_D2005_136.c.04853.04853.4	2126	2143	17	2558.28	640.579	4	-0.7	0.31	0	30.88
INSASQTEGDELKSEQTQPK-GEISEENTK-a13-b2	sp|P17629|HPR1_YEAST	sp|P17629|HPR1_YEAST	intra-protein xl	aleitner_D2005_136.c.02712.02712.4_aleitner_D2005_136.c.02712.02712.4	683	692	9	3176.49	795.131	4	-0.7	0.27	0.78	30.73
VKNTTTLQQHLIDGR-DMIIIR-a2-b1	sp|P04517|POLG_TEV	sp|P04517|POLG_TEV	intra-protein xl	aleitner_D2005_136.c.07676.07676.5_aleitner_D2005_136.c.07676.07676.5	2104	2118	14	2464.36	493.879	5	-1.5	0.22	0	30.6
FLDLQSSIDTKK-VHYSEVDTPFNK-a11-b7	sp|P33441|MFT1_YEAST	sp|P33441|MFT1_YEAST	intra-protein xl	aleitner_D2005_136.c.10526.10526.4_aleitner_D2005_136.c.10526.10526.4	82	21	61	2810.41	703.611	4	-0.6	0.16	0	30.49
DFPPFPQKLK-FREPQREER-a8-b3	sp|P04517|POLG_TEV	sp|P04517|POLG_TEV	intra-protein xl	aleitner_D2005_136.c.05549.05549.4_aleitner_D2005_136.c.05549.05549.4	2134	2139	5	2443.28	611.826	4	-0.6	0.32	0.62	30.45
DILVTGISHQR-KTSEFISEK-a1-b1	sp|P53552|THO2_YEAST	sp|P53552|THO2_YEAST	intra-protein xl	aleitner_D2005_136.c.04541.04541.4_aleitner_D2005_136.c.04541.04541.4	992	1006	14	2287.22	572.813	4	1.9	0.23	0	30.28
FIIDSMTNAIEDEEENNLEK-TFKALPVSFDSIR-a11-b3	sp|P17629|HPR1_YEAST	sp|P17629|HPR1_YEAST	intra-protein xl	aleitner_D2005_136.c.21638.21638.4_aleitner_D2005_136.c.21638.21638.4	82	20	62	3814.87	954.725	4	1.5	0.22	0	30.27
QYDGAFFMDR-KIFVR-a9-b1	sp|P38922|HRB1_YEAST	sp|P38922|HRB1_YEAST	intra-protein xl	aleitner_D2005_136.c.11123.11123.4_aleitner_D2005_136.c.11123.11123.4	227	229	2	1891.94	473.992	4	-1.7	0.32	0	30.25
DKISEETNADIESK-QKTQQDILLFGK-a12-b2	sp|P53552|THO2_YEAST	sp|P53552|THO2_YEAST	intra-protein xl	aleitner_D2005_136.c.08252.08252.4_aleitner_D2005_136.c.08252.08252.4	388	394	6	2977.53	745.389	4	0.2	0.17	0	30.21
EVEGLSEGR-LVDPGLKK-a7-b7	sp|P33441|MFT1_YEAST	sp|P33441|MFT1_YEAST	intra-protein xl	aleitner_D2005_138.c.03922.03922.3_aleitner_D2005_138.c.03922.03922.3	143	181	38	1824.99	609.339	3	-0.8	0.16	0	30.17
DDDDKGENLYFQ-DHDGDYK-a5-b5	sp|P17629|HPR1_YEAST	sp|P17629|HPR1_YEAST	intra-protein xl	aleitner_D2005_138.c.05892.05892.3_aleitner_D2005_138.c.05892.05892.3	764	757	7	2287.91	763.644	3	-2.5	0.28	0	30.13
FTTAKIDGFK-KLXSSDEK-a5-b7	sp|P17629|HPR1_YEAST	sp|P17629|HPR1_YEAST	intra-protein xl	aleitner_D2005_138.c.03396.03396.3_aleitner_D2005_138.c.03396.03396.3	489	483	6	2061.05	688.024	3	0.9	0.27	0	30.06
DFPPFPQKLK-FREPQREER-a8-b7	sp|P04517|POLG_TEV	sp|P04517|POLG_TEV	intra-protein xl	aleitner_D2005_138.c.06566.06566.4_aleitner_D2005_138.c.06566.06566.4	2134	2143	9	2443.28	611.827	4	0.2	0.31	0.64	30
KLSKQNXPIFDFR-AISLVENDDETR-a4-b6	sp|P53552|THO2_YEAST	sp|P53552|THO2_YEAST	intra-protein xl	aleitner_D2005_136.c.10045.10045.4_aleitner_D2005_136.c.10045.10045.4	1335	1322	13	2981.5	746.382	4	2.2	0.29	0	29.7
TITSEVAASVTSK-DMFDNTMIEKR-a5-b10	sp|P53851|TEX1_YEAST	sp|P53851|TEX1_YEAST	intra-protein xl	aleitner_D2005_138.c.11842.11842.3_aleitner_D2005_138.c.11842.11842.3	18	388	370	2673.3	892.107	3	-0.8	0.26	0	29.56
SIHSKLLLR-DKLPDIK-a5-b5	sp|P33441|MFT1_YEAST	sp|P33441|MFT1_YEAST	intra-protein xl	aleitner_D2005_136.c.04376.04376.4_aleitner_D2005_136.c.04376.04376.4	116	109	7	1875.13	469.79	4	-0.8	0.27	0	29.39
ISSETSGGEAKDEIIR-TGVDGLFEEPR-a11-b4	sp|P17629|HPR1_YEAST	sp|P17629|HPR1_YEAST	intra-protein xl	aleitner_D2005_136.c.10168.10168.4_aleitner_D2005_136.c.10168.10168.4	573	604	31	2891.41	723.861	4	-0.8	0.21	0	29.27
RFIIDSXTNAIEDEEENNLEK-TFKALPVSFDSIR-a12-b3	sp|P17629|HPR1_YEAST	sp|P17629|HPR1_YEAST	intra-protein xl	aleitner_D2005_136.c.15379.15379.4_aleitner_D2005_136.c.15379.15379.4	82	20	62	3986.95	997.746	4	-0.8	0.24	0	28.92
KNNGGGNNHNKR-DMFDNTMIEK-a1-b9	sp|P53851|TEX1_YEAST	sp|P53851|TEX1_YEAST	intra-protein xl	aleitner_D2005_138.c.01459.01459.5_aleitner_D2005_138.c.01459.01459.5	391	387	4	2533.16	507.639	5	0.7	0.18	0	28.57
IPTGLDKIEQEVK-KPEGVYEAAQAK-a7-b3	sp|P17629|HPR1_YEAST	sp|P17629|HPR1_YEAST	intra-protein xl	aleitner_D2005_136.c.07694.07694.4_aleitner_D2005_136.c.07694.07694.4	540	549	9	2740.46	686.124	4	-0.3	0.22	0	28.56
ISSETSGGEAKDEIIR-TGVDGLFEEPR-a11-b8	sp|P17629|HPR1_YEAST	sp|P17629|HPR1_YEAST	intra-protein xl	aleitner_D2005_136.c.10529.10529.4_aleitner_D2005_136.c.10529.10529.4	573	608	35	2891.41	723.861	4	-1.4	0.23	0	28.51
SEQTQPKGEISEENTK-GEISEENTK-a7-b5	sp|P17629|HPR1_YEAST	sp|P17629|HPR1_YEAST	intra-protein xl	aleitner_D2005_138.c.01096.01096.4_aleitner_D2005_138.c.01096.01096.4	690	695	5	2791.3	698.833	4	0.3	0.19	0	28.33
IPTGLDKIEQEVK-KPEGVYEAAQAK-a9-b1	sp|P17629|HPR1_YEAST	sp|P17629|HPR1_YEAST	intra-protein xl	aleitner_D2005_138.c.09619.09619.4_aleitner_D2005_138.c.09619.09619.4	542	547	5	2740.47	686.124	4	0	0.25	0	27.25
AISLVENDDETR-LSKQNMPIFDFR-a10-b3	sp|P53552|THO2_YEAST	sp|P53552|THO2_YEAST	intra-protein xl	aleitner_D2005_138.c.13938.13938.4_aleitner_D2005_138.c.13938.13938.4	1326	1335	9	2837.4	710.359	4	0.4	0.15	0	27.17
INSASQTEGDELKSEQTQPK-ALEEEASFPER-a13-b4	sp|P17629|HPR1_YEAST	sp|P17629|HPR1_YEAST	intra-protein xl	aleitner_D2005_136.c.05771.05771.4_aleitner_D2005_136.c.05771.05771.4	683	655	28	3447.62	862.914	4	-1.1	0.24	0	24.42

## Sheet: 2.5 mM DMTMM low res
2.5 mM DMTMM cross-links low-resolution MS/MS
Inter-subunit cross-links
Id	Protein1	Protein2	XLType	Spectrum	AbsPos1	AbsPos2	deltaAA	Mr	Mz	z	Error_rel[ppm]	TIC	deltaS	ld-Score
NYLDQIKMAR-EVEGLSEGR-a7-b1	sp|O13539|THP2_YEAST	sp|P33441|MFT1_YEAST	inter-protein xl	aleitner_D2005_137.c.09557.09557.3_aleitner_D2005_137.c.09557.09557.3	182	137		2207.1	736.708	3	-0.4	0.39	0.77	33.97
VHYSEVDTPFNK-YDKYQTR-a7-b3	sp|P33441|MFT1_YEAST	sp|O13539|THP2_YEAST	inter-protein xl	aleitner_D2005_135.c.03057.03057.4_aleitner_D2005_135.c.03057.03057.4	21	72		2389.13	598.291	4	-0.6	0.35	0.64	30.65
NYLDQIKMAR-EVEGLSEGR-a7-b3	sp|O13539|THP2_YEAST	sp|P33441|MFT1_YEAST	inter-protein xl	aleitner_D2005_135.c.08943.08943.4_aleitner_D2005_135.c.08943.08943.4	182	139		2207.1	552.782	4	-1.1	0.47	0.57	30.33
EMELEEIK-KLQDAR-a3-b1	sp|P53552|THO2_YEAST	sp|P17629|HPR1_YEAST	inter-protein xl	aleitner_D2005_135.c.03028.03028.4_aleitner_D2005_135.c.03028.03028.4	1222	635		1730.88	433.729	4	-1.4	0.24	0.78	29.86
IYLFDVKK-SDIENVR-a7-b2	sp|P53851|TEX1_YEAST	sp|P33441|MFT1_YEAST	inter-protein xl	aleitner_D2005_135.c.08122.08122.4_aleitner_D2005_135.c.08122.08122.4	190	212		1837.99	460.505	4	-2.1	0.57	0.6	29.78
EMELEEIK-KKLQDAR-a3-b2	sp|P53552|THO2_YEAST	sp|P17629|HPR1_YEAST	inter-protein xl	aleitner_D2005_135.c.02227.02227.4_aleitner_D2005_135.c.02227.02227.4	1222	635		1858.98	465.753	4	-0.9	0.36	0.87	29.49
AKFGLENK-ELGTDLVK-a2-b1	sp|O13539|THP2_YEAST	sp|P33441|MFT1_YEAST	inter-protein xl	aleitner_D2005_139.c.05604.05604.4_aleitner_D2005_139.c.05604.05604.4	187	158		1760.96	441.249	4	-1.5	0.43	0.56	28.52
NYLDQIKXAR-EVEGLSEGR-a7-b1	sp|O13539|THP2_YEAST	sp|P33441|MFT1_YEAST	inter-protein xl	aleitner_D2005_135.c.08233.08233.3_aleitner_D2005_135.c.08233.08233.3	182	137		2223.09	742.039	3	-1.3	0.21	0.67	27.91
TKVHYSEVDTPFNK-EAQLLEDTK-a2-b1	sp|P33441|MFT1_YEAST	sp|O13539|THP2_YEAST	inter-protein xl	aleitner_D2005_135.c.05476.05476.4_aleitner_D2005_135.c.05476.05476.4	14	77		2691.34	673.842	4	-0.2	0.3	0.71	27.85
ALEEEASFPER-KQLELNK-a5-b1	sp|P17629|HPR1_YEAST	sp|P53552|THO2_YEAST	inter-protein xl	aleitner_D2005_135.c.04555.04555.4_aleitner_D2005_135.c.04555.04555.4	656	1244		2130.09	533.531	4	-0.9	0.39	0.58	27.72
Ambiguous inter-/intra-subunit cross-link
Id	Protein1	Protein2	XLType	Spectrum	AbsPos1	AbsPos2	deltaAA	Mr	Mz	z	Error_rel[ppm]	TIC	deltaS	ld-Score
LEQADKDTVTK-NTISEAGDK-a6-b8	sp|P10591|HSP71_YEAST	sp|P10591|HSP71_YEAST,sp|P10592|HSP72_YEAST	intra/inter xl	aleitner_D2005_137.c.05082.05082.4_aleitner_D2005_137.c.05082.05082.4	562	555,555		2162.07	541.526	4	0.5	0.28	0.87	20.25
Intra-subunit cross-links
Id	Protein1	Protein2	XLType	Spectrum	AbsPos1	AbsPos2	deltaAA	Mr	Mz	z	Error_rel[ppm]	TIC	deltaS	ld-Score
SSDDLLTESLK-KLPDLHR-a8-b1	sp|O13539|THP2_YEAST	sp|O13539|THP2_YEAST	intra-protein xl	aleitner_D2005_135.c.06403.06403.3_aleitner_D2005_135.c.06403.06403.3	49	53	4	2066.1	689.708	3	-0.8	0.53	0.45	33.69
AFKDFEK-GIDIER-a3-b3	sp|Q07478|SUB2_YEAST	sp|Q07478|SUB2_YEAST	intra-protein xl	aleitner_D2005_137.c.04649.04649.4_aleitner_D2005_137.c.04649.04649.4	353	371	18	1566.8	392.709	4	-0.7	0.58	0.76	32.96
ALEEEASFPER-IKSQR-a5-b2	sp|P17629|HPR1_YEAST	sp|P17629|HPR1_YEAST	intra-protein xl	aleitner_D2005_139.c.02039.02039.3_aleitner_D2005_139.c.02039.02039.3	656	667	11	1888.96	630.663	3	0.3	0.36	0.6	32.49
ITSIFKEELLK-DAEIFGK-a6-b3	sp|P33441|MFT1_YEAST	sp|P33441|MFT1_YEAST	intra-protein xl	aleitner_D2005_135.c.16111.16111.4_aleitner_D2005_135.c.16111.16111.4	242	232	10	2080.14	521.044	4	-0.8	0.4	0.82	32.45
KPEGVYEAAQAK-IEQEVK-a1-b4	sp|P17629|HPR1_YEAST	sp|P17629|HPR1_YEAST	intra-protein xl	aleitner_D2005_137.c.01800.01800.3_aleitner_D2005_137.c.01800.01800.3	547	544	3	2016.05	673.025	3	-1.1	0.41	0.74	32.16
TGVDGLFEEPR-KLQDAR-a8-b1	sp|P17629|HPR1_YEAST	sp|P17629|HPR1_YEAST	intra-protein xl	aleitner_D2005_137.c.06527.06527.4_aleitner_D2005_137.c.06527.06527.4	608	635	27	1929.99	483.505	4	-1.2	0.42	0.57	32.05
ALEEEASFPER-IKSQR-a4-b2	sp|P17629|HPR1_YEAST	sp|P17629|HPR1_YEAST	intra-protein xl	aleitner_D2005_137.c.02256.02256.3_aleitner_D2005_137.c.02256.02256.3	655	667	12	1888.96	630.662	3	-1.3	0.32	0.49	31.68
NKFQTQDYR-DETIR-a2-b2	sp|P53552|THO2_YEAST	sp|P53552|THO2_YEAST	intra-protein xl	aleitner_D2005_139.c.02959.02959.3_aleitner_D2005_139.c.02959.02959.3	1547	1542	5	1812.87	605.299	3	-0.6	0.48	0.5	31.16
NYLKLVDPGLKK-FLIEK-a4-b4	sp|P33441|MFT1_YEAST	sp|P33441|MFT1_YEAST	intra-protein xl	aleitner_D2005_135.c.08699.08699.4_aleitner_D2005_135.c.08699.08699.4	174	169	5	2017.2	505.307	4	-0.8	0.51	0.69	30.98
WESKISSETSGGEAK-DEIIR-a4-b2	sp|P17629|HPR1_YEAST	sp|P17629|HPR1_YEAST	intra-protein xl	aleitner_D2005_139.c.04333.04333.3_aleitner_D2005_139.c.04333.04333.3	562	575	13	2221.09	741.37	3	-0.3	0.32	0.56	29.88
TGVDGLFEEPR-YLFDFDKVNEK-a9-b7	sp|P17629|HPR1_YEAST	sp|P17629|HPR1_YEAST	intra-protein xl	aleitner_D2005_135.c.19606.19606.4_aleitner_D2005_135.c.19606.19606.4	609	596	13	2617.26	655.324	4	-2	0.45	0.58	29.78
EAQLLEDTK-YDKYQTR-a1-b3	sp|O13539|THP2_YEAST	sp|O13539|THP2_YEAST	intra-protein xl	aleitner_D2005_135.c.02624.02624.4_aleitner_D2005_135.c.02624.02624.4	77	72	5	1999.98	501.003	4	-2.1	0.45	0.62	29.65
TGVDGLFEEPR-KVEALDDSFK-a8-b1	sp|P17629|HPR1_YEAST	sp|P17629|HPR1_YEAST	intra-protein xl	aleitner_D2005_137.c.11978.11978.4_aleitner_D2005_137.c.11978.11978.4	608	612	4	2351.16	588.798	4	-2	0.45	0.6	29.45
ALEEEASFPER-KLQDAR-a5-b1	sp|P17629|HPR1_YEAST	sp|P17629|HPR1_YEAST	intra-protein xl	aleitner_D2005_137.c.03287.03287.3_aleitner_D2005_137.c.03287.03287.3	656	635	21	1988	663.673	3	-0.1	0.47	0.57	29.27
EMELEEIK-KQLELNK-a3-b1	sp|P53552|THO2_YEAST	sp|P53552|THO2_YEAST	intra-protein xl	aleitner_D2005_135.c.05069.05069.3_aleitner_D2005_135.c.05069.05069.3	1222	1244	22	1872.98	625.336	3	-1.2	0.29	0.72	28.82
ALEEEASFPER-KLQDAR-a4-b1	sp|P17629|HPR1_YEAST	sp|P17629|HPR1_YEAST	intra-protein xl	aleitner_D2005_139.c.02975.02975.3_aleitner_D2005_139.c.02975.02975.3	655	635	20	1987.99	663.673	3	-1	0.38	0.64	28.72
DIKQDAVR-VNVEGLPR-a3-b4	sp|Q12159|YRA1_YEAST	sp|Q12159|YRA1_YEAST	intra-protein xl	aleitner_D2005_137.c.04670.04670.4_aleitner_D2005_137.c.04670.04670.4	90	83	7	1807.99	453.005	4	-0.7	0.3	0.59	28.52
QLELNKSQR-LQNDPPK-a6-b4	sp|P53552|THO2_YEAST	sp|P53552|THO2_YEAST	intra-protein xl	aleitner_D2005_137.c.01516.01516.3_aleitner_D2005_137.c.01516.01516.3	1250	1257	7	1907.02	636.682	3	0.1	0.28	0.72	28.22
VNEKTGVDGLFEEPR-KVEALDDSFK-a4-b3	sp|P17629|HPR1_YEAST	sp|P17629|HPR1_YEAST	intra-protein xl	aleitner_D2005_135.c.09248.09248.4_aleitner_D2005_135.c.09248.09248.4	600	614	14	2821.41	706.361	4	-0.8	0.39	0.55	27.65
NSTLEIFER-IDSLKR-a8-b5	sp|P53552|THO2_YEAST	sp|P53552|THO2_YEAST	intra-protein xl	aleitner_D2005_137.c.07638.07638.3_aleitner_D2005_137.c.07638.07638.3	1352	1375	23	1819.98	607.667	3	-1.4	0.35	0.52	27.61
LTEQNISQLK-YLDILGKVTK-a3-b7	sp|P33441|MFT1_YEAST	sp|P33441|MFT1_YEAST	intra-protein xl	aleitner_D2005_135.c.12922.12922.4_aleitner_D2005_135.c.12922.12922.4	58	33	25	2303.31	576.835	4	-1.4	0.4	0.6	27.17
DAEIFGK-EKWLR-a1-b2	sp|P33441|MFT1_YEAST	sp|P33441|MFT1_YEAST	intra-protein xl	aleitner_D2005_137.c.07047.07047.3_aleitner_D2005_137.c.07047.07047.3	230	226	4	1490.79	497.936	3	-2.2	0.7	0	26.86
NYLKLVDPGLKK-DSSEER-a4-b1	sp|P33441|MFT1_YEAST	sp|P33441|MFT1_YEAST	intra-protein xl	aleitner_D2005_135.c.03791.03791.4_aleitner_D2005_135.c.03791.03791.4	174	183	9	2090.1	523.532	4	-2	0.35	0.78	26.76
EVKVNVEGLPR-VNVEGLPR-a3-b4	sp|Q12159|YRA1_YEAST	sp|Q12159|YRA1_YEAST	intra-protein xl	aleitner_D2005_135.c.07394.07394.4_aleitner_D2005_135.c.07394.07394.4	79	83	4	2103.18	526.804	4	1.7	0.25	0.47	26.6
NSTLEIFER-YIKNISR-a5-b3	sp|P53552|THO2_YEAST	sp|P53552|THO2_YEAST	intra-protein xl	aleitner_D2005_137.c.07614.07614.4_aleitner_D2005_137.c.07614.07614.4	1349	1379	30	1982.06	496.522	4	-0.8	0.45	0.59	26.59
KLQDAR-DEIIR-a1-b2	sp|P17629|HPR1_YEAST	sp|P17629|HPR1_YEAST	intra-protein xl	aleitner_D2005_139.c.01131.01131.3_aleitner_D2005_139.c.01131.01131.3	635	575	60	1355.75	452.925	3	-1.5	0.34	0	26.38
ELINSSIR-KLPDLHR-a1-b1	sp|O13539|THP2_YEAST	sp|O13539|THP2_YEAST	intra-protein xl	aleitner_D2005_135.c.03172.03172.4_aleitner_D2005_135.c.03172.03172.4	60	53	7	1790.01	448.511	4	-1.5	0.31	0.84	26.12
TGVDGLFEEPR-KVEALDDSFK-a4-b1	sp|P17629|HPR1_YEAST	sp|P17629|HPR1_YEAST	intra-protein xl	aleitner_D2005_137.c.10750.10750.4_aleitner_D2005_137.c.10750.10750.4	604	612	8	2351.16	588.799	4	-0.2	0.31	0.51	26.09
ALEEEASFPER-KKLQDAR-a5-b2	sp|P17629|HPR1_YEAST	sp|P17629|HPR1_YEAST	intra-protein xl	aleitner_D2005_135.c.02166.02166.4_aleitner_D2005_135.c.02166.02166.4	656	635	21	2116.09	530.03	4	-0.8	0.36	0.68	26.02
IPTGLDKIEQEVK-KPEGVYEAAQAK-a11-b1	sp|P17629|HPR1_YEAST	sp|P17629|HPR1_YEAST	intra-protein xl	aleitner_D2005_135.c.09722.09722.3_aleitner_D2005_135.c.09722.09722.3	544	547	3	2740.46	914.495	3	-0.7	0.37	0.61	26
ITSIFKEELLKR-DAEIFGK-a6-b3	sp|P33441|MFT1_YEAST	sp|P33441|MFT1_YEAST	intra-protein xl	aleitner_D2005_135.c.12541.12541.4_aleitner_D2005_135.c.12541.12541.4	242	232	10	2236.24	560.069	4	-1.2	0.22	0.59	25.94
EVEGLSEGR-LVDPGLKK-a3-b7	sp|P33441|MFT1_YEAST	sp|P33441|MFT1_YEAST	intra-protein xl	aleitner_D2005_135.c.03125.03125.4_aleitner_D2005_135.c.03125.03125.4	139	181	42	1824.99	457.256	4	-0.6	0.28	0.66	25.78
DKLPDIKSIHSK-EVEGLSEGR-a7-b3	sp|P33441|MFT1_YEAST	sp|P33441|MFT1_YEAST	intra-protein xl	aleitner_D2005_135.c.03274.03274.5_aleitner_D2005_135.c.03274.03274.5	111	139	28	2336.23	468.254	5	-1.3	0.27	0.8	25.68
SSDDLLTESLKK-ELINSSIR-a11-b1	sp|O13539|THP2_YEAST	sp|O13539|THP2_YEAST	intra-protein xl	aleitner_D2005_139.c.07718.07718.3_aleitner_D2005_139.c.07718.07718.3	52	60	8	2247.19	750.072	3	-0.8	0.3	0.65	25.68
FTTAKIDGFK-EFQNFR-a5-b1	sp|P17629|HPR1_YEAST	sp|P17629|HPR1_YEAST	intra-protein xl	aleitner_D2005_137.c.08000.08000.3_aleitner_D2005_137.c.08000.08000.3	489	495	6	1947.98	650.336	3	-0.6	0.36	0.54	25.58
AFKDFEKR-GIDIER-a3-b3	sp|Q07478|SUB2_YEAST	sp|Q07478|SUB2_YEAST	intra-protein xl	aleitner_D2005_135.c.03322.03322.4_aleitner_D2005_135.c.03322.03322.4	353	371	18	1722.9	431.734	4	-1.1	0.53	0.79	25.47
EAQLLEDTKTGR-DVAAGVQNPK-a9-b1	sp|O13539|THP2_YEAST	sp|O13539|THP2_YEAST	intra-protein xl	aleitner_D2005_135.c.03073.03073.3_aleitner_D2005_135.c.03073.03073.3	85	89	4	2339.21	780.743	3	-0.8	0.4	0.3	25.43
EVEGLSEGR-SIHSKLLLR-a3-b5	sp|P33441|MFT1_YEAST	sp|P33441|MFT1_YEAST	intra-protein xl	aleitner_D2005_137.c.04671.04671.4_aleitner_D2005_137.c.04671.04671.4	139	116	23	2022.12	506.539	4	0.8	0.27	0.75	25.39
EVEGLSEGR-LVDPGLKK-a1-b7	sp|P33441|MFT1_YEAST	sp|P33441|MFT1_YEAST	intra-protein xl	aleitner_D2005_137.c.03862.03862.4_aleitner_D2005_137.c.03862.03862.4	137	181	44	1824.99	457.255	4	-2.4	0.2	0.71	25.36
LVDPGLKK-DSSEER-a7-b4	sp|P33441|MFT1_YEAST	sp|P33441|MFT1_YEAST	intra-protein xl	aleitner_D2005_137.c.01096.01096.4_aleitner_D2005_137.c.01096.01096.4	181	186	5	1571.81	393.961	4	-2.2	0.38	0.6	25.23
AISLVENDDETR-IDSLKR-a6-b5	sp|P53552|THO2_YEAST	sp|P53552|THO2_YEAST	intra-protein xl	aleitner_D2005_135.c.03825.03825.4_aleitner_D2005_135.c.03825.03825.4	1322	1375	53	2073.07	519.275	4	-0.4	0.13	0.84	25.21
FLIEKNYLK-SDIENVR-a5-b2	sp|P33441|MFT1_YEAST	sp|P33441|MFT1_YEAST	intra-protein xl	aleitner_D2005_135.c.07328.07328.4_aleitner_D2005_135.c.07328.07328.4	170	212	42	1980.07	496.024	4	-1.3	0.47	0.74	25.2
FTTAKIDGFK-LXSSDEK-a5-b6	sp|P17629|HPR1_YEAST	sp|P17629|HPR1_YEAST	intra-protein xl	aleitner_D2005_135.c.03650.03650.3_aleitner_D2005_135.c.03650.03650.3	489	483	6	1932.95	645.325	3	0.6	0.24	0.54	25.19
TGVDGLFEEPR-KLQDAR-a9-b1	sp|P17629|HPR1_YEAST	sp|P17629|HPR1_YEAST	intra-protein xl	aleitner_D2005_139.c.05346.05346.4_aleitner_D2005_139.c.05346.05346.4	609	635	26	1929.99	483.505	4	-2	0.21	0.83	25.15
VKNTTTLQQHLIDGR-FREPQREER-a2-b8	sp|P04517|POLG_TEV	sp|P04517|POLG_TEV	intra-protein xl	aleitner_D2005_135.c.02414.02414.5_aleitner_D2005_135.c.02414.02414.5	2104	2144	40	2950.55	591.117	5	-0.2	0.38	0.75	25.01
EVEGLSEGR-SIHSKLLLR-a1-b5	sp|P33441|MFT1_YEAST	sp|P33441|MFT1_YEAST	intra-protein xl	aleitner_D2005_135.c.03861.03861.4_aleitner_D2005_135.c.03861.03861.4	137	116	21	2022.12	506.538	4	-0.4	0.37	0.56	24.69
TGVDGLFEEPR-YLFDFDKVNEK-a8-b7	sp|P17629|HPR1_YEAST	sp|P17629|HPR1_YEAST	intra-protein xl	aleitner_D2005_137.c.17326.17326.4_aleitner_D2005_137.c.17326.17326.4	608	596	12	2617.27	655.325	4	-0.5	0.39	0.57	24.51
EFFASQVGGVQR-VAKLLDTTR-a1-b3	sp|Q12159|YRA1_YEAST	sp|Q12159|YRA1_YEAST	intra-protein xl	aleitner_D2005_135.c.07429.07429.4_aleitner_D2005_135.c.07429.07429.4	96	70	26	2321.25	581.319	4	-1.2	0.38	0.89	24.48
MPKDFPPFPQK-FREPQREER-a3-b7	sp|P04517|POLG_TEV	sp|P04517|POLG_TEV	intra-protein xl	aleitner_D2005_135.c.03642.03642.4_aleitner_D2005_135.c.03642.03642.4	2126	2143	17	2558.28	640.579	4	-0.6	0.43	0.7	24.27
VNEKTGVDGLFEEPR-YLFDFDK-a4-b4	sp|P17629|HPR1_YEAST	sp|P17629|HPR1_YEAST	intra-protein xl	aleitner_D2005_135.c.17642.17642.4_aleitner_D2005_135.c.17642.17642.4	600	593	7	2617.27	655.325	4	0.1	0.41	0.53	24.24
SIHSKLLLR-DKLPDIK-a5-b5	sp|P33441|MFT1_YEAST	sp|P33441|MFT1_YEAST	intra-protein xl	aleitner_D2005_135.c.03764.03764.4_aleitner_D2005_135.c.03764.03764.4	116	109	7	1875.13	469.791	4	0.3	0.25	0.79	24.15
ISSETSGGEAKDEIIR-KPEGVYEAAQAKWESK-a4-b12	sp|P17629|HPR1_YEAST	sp|P17629|HPR1_YEAST	intra-protein xl	aleitner_D2005_135.c.05951.05951.4_aleitner_D2005_135.c.05951.05951.4	566	558	8	3492.74	874.193	4	0.6	0.33	0.73	24.12
EAQLLEDTK-YINLLKR-a1-b6	sp|O13539|THP2_YEAST	sp|O13539|THP2_YEAST	intra-protein xl	aleitner_D2005_135.c.08047.08047.4_aleitner_D2005_135.c.08047.08047.4	77	122	45	1946.08	487.528	4	-1.9	0.33	0.7	24.09
TITSEVAASVTSK-DMFDNTMIEKR-a5-b10	sp|P53851|TEX1_YEAST	sp|P53851|TEX1_YEAST	intra-protein xl	aleitner_D2005_137.c.12852.12852.4_aleitner_D2005_137.c.12852.12852.4	18	388	370	2673.3	669.332	4	-1.2	0.42	0.78	24.06
FTFIKMGNK-IEQEVK-a5-b2	sp|P17629|HPR1_YEAST	sp|P17629|HPR1_YEAST	intra-protein xl	aleitner_D2005_137.c.05725.05725.3_aleitner_D2005_137.c.05725.05725.3	522	542	20	1810.96	604.662	3	-0.7	0.22	0.67	24.05
WESKISSETSGGEAKDEIIR-TGVDGLFEEPR-a4-b4	sp|P17629|HPR1_YEAST	sp|P17629|HPR1_YEAST	intra-protein xl	aleitner_D2005_137.c.10354.10354.4_aleitner_D2005_137.c.10354.10354.4	562	604	42	3421.66	856.423	4	-0.9	0.35	0.6	24.04
KNALSGENTGHMSNR-SLYDER-a1-b5	sp|P53552|THO2_YEAST	sp|P53552|THO2_YEAST	intra-protein xl	aleitner_D2005_135.c.01823.01823.4_aleitner_D2005_135.c.01823.01823.4	967	965	2	2378.1	595.533	4	-1.2	0.31	0.6	24.04
IPPPAFDETFK-KFTFIK-a8-b1	sp|P17629|HPR1_YEAST	sp|P17629|HPR1_YEAST	intra-protein xl	aleitner_D2005_135.c.12798.12798.4_aleitner_D2005_135.c.12798.12798.4	513	517	4	2025.09	507.281	4	-1.6	0.17	0.73	23.98
ELESINASMK-IYDDFSKGPK-a3-b7	sp|P33441|MFT1_YEAST	sp|P33441|MFT1_YEAST	intra-protein xl	aleitner_D2005_135.c.06160.06160.4_aleitner_D2005_135.c.06160.06160.4	203	197	6	2271.11	568.785	4	-0.9	0.29	0.68	23.88
ISEETNADIESK-QKTQQDILLFGK-a4-b2	sp|P53552|THO2_YEAST	sp|P53552|THO2_YEAST	intra-protein xl	aleitner_D2005_135.c.07265.07265.4_aleitner_D2005_135.c.07265.07265.4	382	394	12	2734.4	684.608	4	-1.1	0.25	0.72	23.87
AISLVENDDETR-LSKQNMPIFDFR-a6-b3	sp|P53552|THO2_YEAST	sp|P53552|THO2_YEAST	intra-protein xl	aleitner_D2005_135.c.17014.17014.4_aleitner_D2005_135.c.17014.17014.4	1322	1335	13	2837.4	710.357	4	-1.1	0.35	0.66	23.86
KVEALDDSFK-YLFDFDK-a1-b4	sp|P17629|HPR1_YEAST	sp|P17629|HPR1_YEAST	intra-protein xl	aleitner_D2005_135.c.14190.14190.4_aleitner_D2005_135.c.14190.14190.4	612	593	19	2079.02	520.763	4	-0.5	0.38	0.68	23.74
LNGDFNDQASR-KQLELNK-a4-b1	sp|P53552|THO2_YEAST	sp|P53552|THO2_YEAST	intra-protein xl	aleitner_D2005_137.c.03314.03314.4_aleitner_D2005_137.c.03314.03314.4	1109	1244	135	2089.05	523.271	4	-1.3	0.21	0.82	23.62
WESKISSETSGGEAKDEIIR-TGVDGLFEEPR-a4-b8	sp|P17629|HPR1_YEAST	sp|P17629|HPR1_YEAST	intra-protein xl	aleitner_D2005_135.c.10461.10461.5_aleitner_D2005_135.c.10461.10461.5	562	608	46	3421.66	685.339	5	-1.6	0.29	0.63	23.54
NYLKLVDPGLKK-EVEGLSEGR-a4-b3	sp|P33441|MFT1_YEAST	sp|P33441|MFT1_YEAST	intra-protein xl	aleitner_D2005_135.c.06476.06476.5_aleitner_D2005_135.c.06476.06476.5	174	139	35	2343.28	469.664	5	-0.2	0.33	0.74	23.44
FTTAKIDGFK-LMSSDEK-a5-b5	sp|P17629|HPR1_YEAST	sp|P17629|HPR1_YEAST	intra-protein xl	aleitner_D2005_135.c.04336.04336.4_aleitner_D2005_135.c.04336.04336.4	489	482	7	1916.95	480.246	4	-0.7	0.18	0.56	23.41
IGKLQGLYDSVQVINR-ELGTDLVK-a3-b1	sp|P33441|MFT1_YEAST	sp|P33441|MFT1_YEAST	intra-protein xl	aleitner_D2005_137.c.15477.15477.3_aleitner_D2005_137.c.15477.15477.3	123	158	35	2657.47	886.832	3	-0.7	0.26	0.43	23.4
DKISEETNADIESK-QKTQQDILLFGK-a12-b2	sp|P53552|THO2_YEAST	sp|P53552|THO2_YEAST	intra-protein xl	aleitner_D2005_135.c.07246.07246.4_aleitner_D2005_135.c.07246.07246.4	388	394	6	2977.52	745.388	4	-0.6	0.21	0.87	23.37
ELESINASMK-IYDDFSKGPK-a1-b7	sp|P33441|MFT1_YEAST	sp|P33441|MFT1_YEAST	intra-protein xl	aleitner_D2005_139.c.05881.05881.3_aleitner_D2005_139.c.05881.05881.3	201	197	4	2271.11	758.043	3	-1.1	0.19	0.59	23.29
WESKISSETSGGEAK-DEIIR-a4-b1	sp|P17629|HPR1_YEAST	sp|P17629|HPR1_YEAST	intra-protein xl	aleitner_D2005_135.c.04006.04006.4_aleitner_D2005_135.c.04006.04006.4	562	574	12	2221.08	556.278	4	-1.7	0.23	0.8	23.19
NYLKLVDPGLKK-EVEGLSEGR-a4-b1	sp|P33441|MFT1_YEAST	sp|P33441|MFT1_YEAST	intra-protein xl	aleitner_D2005_135.c.06358.06358.4_aleitner_D2005_135.c.06358.06358.4	174	137	37	2343.28	586.828	4	0.7	0.34	0.68	23.16
DFPPFPQKLK-DMIIIR-a8-b1	sp|P04517|POLG_TEV	sp|P04517|POLG_TEV	intra-protein xl	aleitner_D2005_135.c.15752.15752.4_aleitner_D2005_135.c.15752.15752.4	2134	2118	16	1957.09	490.28	4	1.1	0.6	0.8	23.15
QYDGAFFMDR-KIFVR-a9-b1	sp|P38922|HRB1_YEAST	sp|P38922|HRB1_YEAST	intra-protein xl	aleitner_D2005_135.c.10789.10789.4_aleitner_D2005_135.c.10789.10789.4	227	229	2	1891.94	473.992	4	-1	0.44	0.69	23.11
ELESINASMK-FLIEKNYLK-a3-b5	sp|P33441|MFT1_YEAST	sp|P33441|MFT1_YEAST	intra-protein xl	aleitner_D2005_135.c.10748.10748.4_aleitner_D2005_135.c.10748.10748.4	203	170	33	2269.2	568.308	4	-1.1	0.3	0.75	23.09
LTGSIINGTLSNDDSK-IEKLTEQNISQLK-a13-b3	sp|P33441|MFT1_YEAST	sp|P33441|MFT1_YEAST	intra-protein xl	aleitner_D2005_137.c.11161.11161.4_aleitner_D2005_137.c.11161.11161.4	49	55	6	3158.67	790.674	4	-0.3	0.31	0.82	23.05
EAQLLEDTK-YDKYQTR-a6-b3	sp|O13539|THP2_YEAST	sp|O13539|THP2_YEAST	intra-protein xl	aleitner_D2005_135.c.02532.02532.3_aleitner_D2005_135.c.02532.02532.3	82	72	10	1999.98	667.669	3	-0.4	0.26	0.81	22.87
NKDTAPHIVVATPGR-DAELLK-a2-b3	sp|Q07478|SUB2_YEAST	sp|Q07478|SUB2_YEAST	intra-protein xl	aleitner_D2005_135.c.03412.03412.4_aleitner_D2005_135.c.03412.03412.4	181	176	5	2244.22	562.062	4	-1.8	0.26	0.84	22.84
ADIITSR-KIFVR-a2-b1	sp|P38922|HRB1_YEAST	sp|P38922|HRB1_YEAST	intra-protein xl	aleitner_D2005_137.c.03745.03745.3_aleitner_D2005_137.c.03745.03745.3	191	229	38	1417.84	473.62	3	-2.1	0.2	0	22.83
ISSETSGGEAKDEIIR-VNEKTGVDGLFEEPR-a4-b4	sp|P17629|HPR1_YEAST	sp|P17629|HPR1_YEAST	intra-protein xl	aleitner_D2005_135.c.06870.06870.4_aleitner_D2005_135.c.06870.06870.4	566	600	34	3361.66	841.423	4	-1.2	0.35	0.65	22.83
FIIDSXTNAIEDEEENNLEK-TFKALPVSFDSIR-a13-b3	sp|P17629|HPR1_YEAST	sp|P17629|HPR1_YEAST	intra-protein xl	aleitner_D2005_135.c.19496.19496.4_aleitner_D2005_135.c.19496.19496.4	84	20	64	3830.85	958.721	4	-0.5	0.28	0.47	22.74
DKLPDIKSIHSK-EVEGLSEGR-a7-b1	sp|P33441|MFT1_YEAST	sp|P33441|MFT1_YEAST	intra-protein xl	aleitner_D2005_135.c.03253.03253.4_aleitner_D2005_135.c.03253.03253.4	111	137	26	2336.23	585.065	4	-2.6	0.24	0.63	22.69
EAQLLEDTK-AKFGLENK-a1-b2	sp|O13539|THP2_YEAST	sp|O13539|THP2_YEAST	intra-protein xl	aleitner_D2005_137.c.05884.05884.3_aleitner_D2005_137.c.05884.05884.3	77	187	110	1933.02	645.346	3	-0.2	0.17	0.83	22.62
ITSIFKEELLKR-DAEIFGK-a6-b1	sp|P33441|MFT1_YEAST	sp|P33441|MFT1_YEAST	intra-protein xl	aleitner_D2005_135.c.11276.11276.4_aleitner_D2005_135.c.11276.11276.4	242	230	12	2236.24	560.069	4	-0.8	0.35	0.74	22.58
ISSETSGGEAKDEIIR-KPEGVYEAAQAK-a4-b1	sp|P17629|HPR1_YEAST	sp|P17629|HPR1_YEAST	intra-protein xl	aleitner_D2005_135.c.02584.02584.4_aleitner_D2005_135.c.02584.02584.4	566	547	19	2962.49	741.63	4	-0.4	0.31	0.77	22.53
IGKLQGLYDSVQVINR-EVEGLSEGR-a3-b1	sp|P33441|MFT1_YEAST	sp|P33441|MFT1_YEAST	intra-protein xl	aleitner_D2005_135.c.13765.13765.4_aleitner_D2005_135.c.13765.13765.4	123	137	14	2758.46	690.622	4	-1.8	0.3	0.74	22.45
VKNTTTLQQHLIDGR-FREPQREER-a2-b7	sp|P04517|POLG_TEV	sp|P04517|POLG_TEV	intra-protein xl	aleitner_D2005_135.c.02274.02274.4_aleitner_D2005_135.c.02274.02274.4	2104	2143	39	2950.55	738.645	4	0.2	0.19	0.64	22.27
EFFASQVGGVQR-DIKQDAVR-a1-b3	sp|Q12159|YRA1_YEAST	sp|Q12159|YRA1_YEAST	intra-protein xl	aleitner_D2005_137.c.07417.07417.3_aleitner_D2005_137.c.07417.07417.3	96	90	6	2249.16	750.726	3	0.2	0.21	0.49	22.23
KQLELNKSQR-EXELEEIK-a7-b5	sp|P53552|THO2_YEAST	sp|P53552|THO2_YEAST	intra-protein xl	aleitner_D2005_135.c.02454.02454.4_aleitner_D2005_135.c.02454.02454.4	1250	1224	26	2260.18	566.052	4	0.9	0.18	0.83	22.09
SSDDLLTESLK-KLPDLHR-a4-b1	sp|O13539|THP2_YEAST	sp|O13539|THP2_YEAST	intra-protein xl	aleitner_D2005_137.c.07549.07549.4_aleitner_D2005_137.c.07549.07549.4	45	53	8	2066.1	517.533	4	-0.9	0.32	0.76	21.93
SIHSKLLLR-ELGTDLVK-a5-b5	sp|P33441|MFT1_YEAST	sp|P33441|MFT1_YEAST	intra-protein xl	aleitner_D2005_135.c.06045.06045.4_aleitner_D2005_135.c.06045.06045.4	116	162	46	1921.13	481.291	4	-2.1	0.17	0.78	21.91
DKISEETNADIESK-VSFNKAER-a12-b5	sp|P53552|THO2_YEAST	sp|P53552|THO2_YEAST	intra-protein xl	aleitner_D2005_135.c.02840.02840.4_aleitner_D2005_135.c.02840.02840.4	388	634	246	2509.23	628.315	4	-0.4	0.29	0.53	21.88
DMFDNTMIEK-NEKNLITYWK-a1-b3	sp|P53851|TEX1_YEAST	sp|P53851|TEX1_YEAST	intra-protein xl	aleitner_D2005_135.c.17738.17738.4_aleitner_D2005_135.c.17738.17738.4	379	371	8	2532.2	634.058	4	-0.9	0.22	0.83	21.76
TGVDGLFEEPR-YLFDFDKVNEK-a4-b7	sp|P17629|HPR1_YEAST	sp|P17629|HPR1_YEAST	intra-protein xl	aleitner_D2005_135.c.18834.18834.4_aleitner_D2005_135.c.18834.18834.4	604	596	8	2617.27	655.325	4	-0.9	0.35	0.7	21.53
LTGSIINGTLSNDDSKIEK-LTEQNISQLK-a16-b3	sp|P33441|MFT1_YEAST	sp|P33441|MFT1_YEAST	intra-protein xl	aleitner_D2005_135.c.11108.11108.4_aleitner_D2005_135.c.11108.11108.4	52	58	6	3158.66	790.674	4	-1.3	0.38	0.88	21.46
DHDGDYKDDDDK-GENLYFQ-a7-b2	sp|P17629|HPR1_YEAST	sp|P17629|HPR1_YEAST	intra-protein xl	aleitner_D2005_137.c.05671.05671.3_aleitner_D2005_137.c.05671.05671.3	759	766	7	2287.91	763.645	3	-0.7	0.32	0	21.42
FLIEKNYLK-DSSEER-a5-b1	sp|P33441|MFT1_YEAST	sp|P33441|MFT1_YEAST	intra-protein xl	aleitner_D2005_137.c.05297.05297.3_aleitner_D2005_137.c.05297.05297.3	170	183	13	1869.94	624.323	3	-1.5	0.17	0	21.42
TGVDGLFEEPR-LLYKINQEHR-a4-b4	sp|P17629|HPR1_YEAST	sp|P17629|HPR1_YEAST	intra-protein xl	aleitner_D2005_135.c.07256.07256.4_aleitner_D2005_135.c.07256.07256.4	604	627	23	2513.3	629.332	4	-1.6	0.17	0.64	21.32
EAQLLEDTK-YINLLKR-a6-b6	sp|O13539|THP2_YEAST	sp|O13539|THP2_YEAST	intra-protein xl	aleitner_D2005_135.c.07621.07621.3_aleitner_D2005_135.c.07621.07621.3	82	122	40	1946.08	649.702	3	-0.6	0.16	0	21.3
ISSETSGGEAKDEIIR-KLQDAR-a4-b1	sp|P17629|HPR1_YEAST	sp|P17629|HPR1_YEAST	intra-protein xl	aleitner_D2005_137.c.01312.01312.4_aleitner_D2005_137.c.01312.01312.4	566	635	69	2402.24	601.567	4	-1	0.33	0.9	21.23
TGVDGLFEEPR-EKLLYK-a8-b2	sp|P17629|HPR1_YEAST	sp|P17629|HPR1_YEAST	intra-protein xl	aleitner_D2005_135.c.09764.09764.4_aleitner_D2005_135.c.09764.09764.4	608	623	15	1993.05	499.27	4	-1.6	0.27	0.72	21.17
FIIDSMTNAIEDEEENNLEK-TFKALPVSFDSIR-a15-b3	sp|P17629|HPR1_YEAST	sp|P17629|HPR1_YEAST	intra-protein xl	aleitner_D2005_135.c.24955.24955.3_aleitner_D2005_135.c.24955.24955.3	86	20	66	3814.86	1272.63	3	-0.6	0.31	0.51	21.15
ELESINASXK-IYDDFSKGPK-a1-b7	sp|P33441|MFT1_YEAST	sp|P33441|MFT1_YEAST	intra-protein xl	aleitner_D2005_135.c.04416.04416.3_aleitner_D2005_135.c.04416.04416.3	201	197	4	2287.11	763.377	3	0.8	0.22	0.52	20.83
KVEALDDSFKEK-YLFDFDK-a10-b4	sp|P17629|HPR1_YEAST	sp|P17629|HPR1_YEAST	intra-protein xl	aleitner_D2005_135.c.10668.10668.4_aleitner_D2005_135.c.10668.10668.4	621	593	28	2336.16	585.047	4	-0.2	0.4	0.71	20.61
LVDPGLKKDSSEER-EVEGLSEGR-a7-b3	sp|P33441|MFT1_YEAST	sp|P33441|MFT1_YEAST	intra-protein xl	aleitner_D2005_135.c.02588.02588.5_aleitner_D2005_135.c.02588.02588.5	181	139	42	2528.27	506.662	5	-0.4	0.26	0.84	20.56
LGYIAEDAGIR-VSVNNKRNR-a6-b6	sp|P04517|POLG_TEV	sp|P04517|POLG_TEV	intra-protein xl	aleitner_D2005_135.c.02470.02470.5_aleitner_D2005_135.c.02470.02470.5	1646	102	1544	2244.21	449.851	5	2.1	0.23	0.87	20.53
EAQLLEDTK-LRYDKYQTR-a1-b5	sp|O13539|THP2_YEAST	sp|O13539|THP2_YEAST	intra-protein xl	aleitner_D2005_135.c.03010.03010.4_aleitner_D2005_135.c.03010.03010.4	77	72	5	2269.17	568.3	4	-1.3	0.31	0.79	20.45
VKNTTTLQQHLIDGR-LNADSVLWGGHK-a2-b4	sp|P04517|POLG_TEV	sp|P04517|POLG_TEV	intra-protein xl	aleitner_D2005_135.c.06879.06879.4_aleitner_D2005_135.c.06879.06879.4	2104	2244	140	3000.59	751.156	4	0.6	0.2	0.68	20.44
ISSETSGGEAKDEIIR-KVEALDDSFKEK-a4-b10	sp|P17629|HPR1_YEAST	sp|P17629|HPR1_YEAST	intra-protein xl	aleitner_D2005_135.c.03284.03284.5_aleitner_D2005_135.c.03284.03284.5	566	621	55	3080.55	617.117	5	-1.8	0.29	0.81	20.26
DFPPFPQKLK-FREPQREER-a8-b3	sp|P04517|POLG_TEV	sp|P04517|POLG_TEV	intra-protein xl	aleitner_D2005_135.c.04871.04871.4_aleitner_D2005_135.c.04871.04871.4	2134	2139	5	2443.27	611.826	4	-1	0.75	0.8	20.05
KVEALDDSFKEK-ALEEEASFPER-a10-b5	sp|P17629|HPR1_YEAST	sp|P17629|HPR1_YEAST	intra-protein xl	aleitner_D2005_135.c.05462.05462.4_aleitner_D2005_135.c.05462.05462.4	621	656	35	2666.3	667.583	4	-1.9	0.34	0.66	20.04
ISSETSGGEAKDEIIR-KLMSSDEK-a9-b1	sp|P17629|HPR1_YEAST	sp|P17629|HPR1_YEAST	intra-protein xl	aleitner_D2005_135.c.01903.01903.4_aleitner_D2005_135.c.01903.01903.4	571	477	94	2609.29	653.33	4	1.6	0.19	0.66	20.03
DSPSENEEKPNKR-FPEKPFQEGK-a7-b4	sp|P53552|THO2_YEAST	sp|P53552|THO2_YEAST	intra-protein xl	aleitner_D2005_135.c.01374.01374.4_aleitner_D2005_135.c.01374.01374.4	1531	1503	28	2716.31	680.085	4	-0.6	0.26	0.78	19.93
TGVDGLFEEPR-KVEALDDSFK-a9-b1	sp|P17629|HPR1_YEAST	sp|P17629|HPR1_YEAST	intra-protein xl	aleitner_D2005_135.c.12427.12427.3_aleitner_D2005_135.c.12427.12427.3	609	612	3	2351.16	784.729	3	-0.3	0.33	0.67	19.88
WESKISSETSGGEAKDEIIR-KPEGVYEAAQAK-a4-b7	sp|P17629|HPR1_YEAST	sp|P17629|HPR1_YEAST	intra-protein xl	aleitner_D2005_135.c.03858.03858.5_aleitner_D2005_135.c.03858.03858.5	562	553	9	3492.74	699.555	5	-0.1	0.27	0.8	19.78
LENNDILNTVK-KLQDAR-a5-b1	sp|P17629|HPR1_YEAST	sp|P17629|HPR1_YEAST	intra-protein xl	aleitner_D2005_135.c.03185.03185.4_aleitner_D2005_135.c.03185.03185.4	192	635	443	1983.07	496.776	4	-1.8	0.15	0.78	19.78
SILKALSIDTIAK-ISEETNADIESK-a4-b4	sp|P53552|THO2_YEAST	sp|P53552|THO2_YEAST	intra-protein xl	aleitner_D2005_135.c.11823.11823.4_aleitner_D2005_135.c.11823.11823.4	644	382	262	2688.44	673.118	4	-1.6	0.25	0.89	19.67
ELESINASXK-IYDDFSKGPK-a3-b7	sp|P33441|MFT1_YEAST	sp|P33441|MFT1_YEAST	intra-protein xl	aleitner_D2005_135.c.04940.04940.4_aleitner_D2005_135.c.04940.04940.4	203	197	6	2287.11	572.784	4	0.5	0.24	0.8	19.66
KLSKQNMPIFDFR-NSTLEIFER-a1-b5	sp|P53552|THO2_YEAST	sp|P53552|THO2_YEAST	intra-protein xl	aleitner_D2005_135.c.16171.16171.4_aleitner_D2005_135.c.16171.16171.4	1332	1349	17	2712.4	679.108	4	-1.9	0.25	0.67	19.49
IDGFKEFQNFR-IKDPDFYR-a5-b5	sp|P17629|HPR1_YEAST	sp|P17629|HPR1_YEAST	intra-protein xl	aleitner_D2005_135.c.10269.10269.4_aleitner_D2005_135.c.10269.10269.4	494	470	24	2434.21	609.559	4	-0.5	0.2	0.65	19.42
KLSKQNXPIFDFR-NSTLEIFER-a1-b5	sp|P53552|THO2_YEAST	sp|P53552|THO2_YEAST	intra-protein xl	aleitner_D2005_135.c.12554.12554.4_aleitner_D2005_135.c.12554.12554.4	1332	1349	17	2728.4	683.108	4	-0.6	0.29	0.73	19.38
KPEGVYEAAQAK-KVEALDDSFKEK-a7-b10	sp|P17629|HPR1_YEAST	sp|P17629|HPR1_YEAST	intra-protein xl	aleitner_D2005_135.c.02448.02448.3_aleitner_D2005_135.c.02448.02448.3	553	621	68	2679.37	894.132	3	-1.1	0.25	0.58	19.31
KLXSSDEK-EFQNFR-a1-b1	sp|P17629|HPR1_YEAST	sp|P17629|HPR1_YEAST	intra-protein xl	aleitner_D2005_137.c.01428.01428.3_aleitner_D2005_137.c.01428.01428.3	477	495	18	1773.83	592.286	3	-1.3	0.18	0	19.14
VKNTTTLQQHLIDGR-DFPPFPQK-a2-b1	sp|P04517|POLG_TEV	sp|P04517|POLG_TEV	intra-protein xl	aleitner_D2005_137.c.08311.08311.4_aleitner_D2005_137.c.08311.08311.4	2104	2127	23	2679.41	670.86	4	-1.5	0.24	0.88	19.06
TKVHYSEVDTPFNK-IEKLTEQNISQLK-a9-b3	sp|P33441|MFT1_YEAST	sp|P33441|MFT1_YEAST	intra-protein xl	aleitner_D2005_135.c.21174.21174.3_aleitner_D2005_135.c.21174.21174.3	21	55	34	3188.67	1063.9	3	-1.2	0.18	0.63	19.02
ITSIFKEELLKR-DAEIFGK-a11-b1	sp|P33441|MFT1_YEAST	sp|P33441|MFT1_YEAST	intra-protein xl	aleitner_D2005_135.c.10611.10611.5_aleitner_D2005_135.c.10611.10611.5	247	230	17	2236.24	448.257	5	-1.3	0.34	0.7	19.02
ELINSSIR-YDKYQTR-a1-b3	sp|O13539|THP2_YEAST	sp|O13539|THP2_YEAST	intra-protein xl	aleitner_D2005_135.c.02822.02822.4_aleitner_D2005_135.c.02822.02822.4	60	72	12	1884.97	472.249	4	-1.8	0.19	0.71	18.98
KVEALDDSFKEK-TGVDGLFEEPR-a10-b8	sp|P17629|HPR1_YEAST	sp|P17629|HPR1_YEAST	intra-protein xl	aleitner_D2005_137.c.09017.09017.4_aleitner_D2005_137.c.09017.09017.4	621	608	13	2608.3	653.082	4	-1.3	0.31	0.85	18.96
FLDLQSSIDTKK-LTEQNISQLK-a11-b3	sp|P33441|MFT1_YEAST	sp|P33441|MFT1_YEAST	intra-protein xl	aleitner_D2005_135.c.09760.09760.4_aleitner_D2005_135.c.09760.09760.4	82	58	24	2548.37	638.101	4	-1	0.26	0.77	18.83
INSASQTEGDELKSEQTQPK-ALEEEASFPER-a13-b3	sp|P17629|HPR1_YEAST	sp|P17629|HPR1_YEAST	intra-protein xl	aleitner_D2005_135.c.04936.04936.4_aleitner_D2005_135.c.04936.04936.4	683	654	29	3447.62	862.914	4	-0.7	0.22	0.74	18.83
XPKDFPPFPQK-FREPQREER-a3-b7	sp|P04517|POLG_TEV	sp|P04517|POLG_TEV	intra-protein xl	aleitner_D2005_135.c.02684.02684.4_aleitner_D2005_135.c.02684.02684.4	2126	2143	17	2574.28	644.578	4	0.7	0.26	0.9	18.75
FIIDSXTNAIEDEEENNLEK-TFKALPVSFDSIR-a11-b3	sp|P17629|HPR1_YEAST	sp|P17629|HPR1_YEAST	intra-protein xl	aleitner_D2005_137.c.17562.17562.4_aleitner_D2005_137.c.17562.17562.4	82	20	62	3830.85	958.72	4	-1.5	0.31	0.67	18.51
AHIQLVYTTLEENLINEER-EDIKLPSSALIGHLK-a18-b4	sp|P53552|THO2_YEAST	sp|P53552|THO2_YEAST	intra-protein xl	aleitner_D2005_135.c.22040.22040.5_aleitner_D2005_135.c.22040.22040.5	1177	1182	5	3886.09	778.225	5	0.5	0.24	0.68	18.44
IYLFDVK-TSKNTDR-a5-b3	sp|P53851|TEX1_YEAST	sp|P53851|TEX1_YEAST	intra-protein xl	aleitner_D2005_137.c.11357.11357.3_aleitner_D2005_137.c.11357.11357.3	188	405	217	1698.9	567.306	3	1.1	0.15	0.66	18.32
AISLVENDDETR-SELPTRPSKSK-a6-b9	sp|P53552|THO2_YEAST	sp|P53552|THO2_YEAST	intra-protein xl	aleitner_D2005_135.c.02648.02648.4_aleitner_D2005_135.c.02648.02648.4	1322	1455	133	2571.31	643.836	4	-0.1	0.44	0.8	18.25
GAVGSGKSTGLPYHLSK-XPKDFPPFPQK-a7-b4	sp|P04517|POLG_TEV	sp|P04517|POLG_TEV	intra-protein xl	aleitner_D2005_135.c.12437.12437.4_aleitner_D2005_135.c.12437.12437.4	1253	2127	874	2986.54	747.644	4	2	0.23	0.79	18.19
SSDDLLTESLK-YINLLKR-a3-b6	sp|O13539|THP2_YEAST	sp|O13539|THP2_YEAST	intra-protein xl	aleitner_D2005_135.c.12810.12810.4_aleitner_D2005_135.c.12810.12810.4	44	122	78	2107.15	527.795	4	-1.5	0.2	0.84	17.95
KVEALDDSFKEK-TGVDGLFEEPR-a10-b9	sp|P17629|HPR1_YEAST	sp|P17629|HPR1_YEAST	intra-protein xl	aleitner_D2005_139.c.07488.07488.4_aleitner_D2005_139.c.07488.07488.4	621	609	12	2608.3	653.083	4	-0.8	0.15	0.79	17.79
SEQTQPKGEISEENTK-ALEEEASFPER-a7-b3	sp|P17629|HPR1_YEAST	sp|P17629|HPR1_YEAST	intra-protein xl	aleitner_D2005_135.c.03750.03750.4_aleitner_D2005_135.c.03750.03750.4	690	654	36	3062.43	766.616	4	-0.1	0.28	0.88	17.78
LNADSVLWGGHK-MPKDFPPFPQK-a4-b3	sp|P04517|POLG_TEV	sp|P04517|POLG_TEV	intra-protein xl	aleitner_D2005_135.c.11886.11886.4_aleitner_D2005_135.c.11886.11886.4	2244	2126	118	2608.33	653.09	4	0.5	0.25	0.75	17.49
EMADYFEKK-KSLEDLDK-a7-b1	sp|Q12159|YRA1_YEAST	sp|Q12159|YRA1_YEAST	intra-protein xl	aleitner_D2005_135.c.06252.06252.4_aleitner_D2005_135.c.06252.06252.4	224	210	14	2088.01	523.009	4	-0.9	0.2	0.9	17.45
GPKELESINASMK-SDIENVR-a3-b2	sp|P33441|MFT1_YEAST	sp|P33441|MFT1_YEAST	intra-protein xl	aleitner_D2005_135.c.04787.04787.3_aleitner_D2005_135.c.04787.04787.3	200	212	12	2216.11	739.711	3	-0.1	0.16	0.65	17.37
SEQTQPKGEISEENTK-GEISEENTK-a7-b2	sp|P17629|HPR1_YEAST	sp|P17629|HPR1_YEAST	intra-protein xl	aleitner_D2005_137.c.01075.01075.4_aleitner_D2005_137.c.01075.01075.4	690	692	2	2791.29	698.831	4	-2.8	0.15	0.9	17.32
SISEYYSTFEHLNR-YINLLKR-a10-b6	sp|O13539|THP2_YEAST	sp|O13539|THP2_YEAST	intra-protein xl	aleitner_D2005_137.c.13404.13404.4_aleitner_D2005_137.c.13404.13404.4	108	122	14	2645.36	662.347	4	-1	0.24	0.89	17.32
ISEETNADIESK-LLNKEQTTLLR-a3-b4	sp|P53552|THO2_YEAST	sp|P53552|THO2_YEAST	intra-protein xl	aleitner_D2005_135.c.05079.05079.4_aleitner_D2005_135.c.05079.05079.4	381	152	229	2644.39	662.105	4	-0.7	0.15	0.81	17.27
VRVAKNAXTK-SDGVFK-a5-b2	sp|P04517|POLG_TEV	sp|P04517|POLG_TEV	intra-protein xl	aleitner_D2005_135.c.17070.17070.3_aleitner_D2005_135.c.17070.17070.3	1000	1139	139	1765.95	589.656	3	-3	0.18	0.88	17.27
IREXELEEIK-QLELNKSQR-a7-b6	sp|P53552|THO2_YEAST	sp|P53552|THO2_YEAST	intra-protein xl	aleitner_D2005_135.c.03328.03328.4_aleitner_D2005_135.c.03328.03328.4	1224	1250	26	2401.26	601.324	4	0.3	0.15	0.87	17.13
QGNNEETDKETGVIEEPDAVNDAEEADSDHSSR-KLGGTTSDFSASSSVEEVK-a8-b1	sp|P33441|MFT1_YEAST	sp|P33441|MFT1_YEAST	intra-protein xl	aleitner_D2005_135.c.06429.06429.5_aleitner_D2005_135.c.06429.06429.5	348	374	26	5496.43	1100.29	5	-1	0.28	0.7	17.04
SIHSKLLLR-ELGTDLVK-a5-b1	sp|P33441|MFT1_YEAST	sp|P33441|MFT1_YEAST	intra-protein xl	aleitner_D2005_135.c.06039.06039.3_aleitner_D2005_135.c.06039.06039.3	116	158	42	1921.13	641.386	3	-0.7	0.17	0.84	16.97
ISSETSGGEAKDEIIR-ALEEEASFPER-a11-b4	sp|P17629|HPR1_YEAST	sp|P17629|HPR1_YEAST	intra-protein xl	aleitner_D2005_135.c.06408.06408.4_aleitner_D2005_135.c.06408.06408.4	573	655	82	2949.41	738.361	4	-2.1	0.21	0.75	16.84
IPTGLDKIEQEVK-KPEGVYEAAQAK-a9-b1	sp|P17629|HPR1_YEAST	sp|P17629|HPR1_YEAST	intra-protein xl	aleitner_D2005_137.c.10216.10216.3_aleitner_D2005_137.c.10216.10216.3	542	547	5	2740.46	914.495	3	-0.8	0.23	0.6	16.83
LQGLYDSVQVINR-SIHSKLLLR-a6-b5	sp|P33441|MFT1_YEAST	sp|P33441|MFT1_YEAST	intra-protein xl	aleitner_D2005_135.c.08647.08647.4_aleitner_D2005_135.c.08647.08647.4	129	116	13	2551.46	638.872	4	-0.6	0.17	0.65	16.8
VTKLTGSIINGTLSNDDSKIEK-LTEQNISQLK-a3-b3	sp|P33441|MFT1_YEAST	sp|P33441|MFT1_YEAST	intra-protein xl	aleitner_D2005_135.c.08440.08440.4_aleitner_D2005_135.c.08440.08440.4	36	58	22	3486.88	872.727	4	-0.7	0.22	0.76	16.59
NEPVIPTKPSSSQWSYSK-AISLVENDDETR-a8-b6	sp|P53552|THO2_YEAST	sp|P53552|THO2_YEAST	intra-protein xl	aleitner_D2005_135.c.09967.09967.4_aleitner_D2005_135.c.09967.09967.4	1287	1322	35	3376.64	845.168	4	-0.6	0.3	0.7	16.57
FPQVAATGDGPDIIFWAHDR-VTVEHPDKLEEK-a9-b8	sp|P0AEX9|MALE_ECOLI	sp|P0AEX9|MALE_ECOLI	intra-protein xl	aleitner_D2005_137.c.13729.13729.4_aleitner_D2005_137.c.13729.13729.4	81	68	13	3616.79	905.205	4	-1.7	0.25	0.62	16.53
ISSETSGGEAKDEIIR-TGVDGLFEEPR-a11-b8	sp|P17629|HPR1_YEAST	sp|P17629|HPR1_YEAST	intra-protein xl	aleitner_D2005_135.c.10097.10097.4_aleitner_D2005_135.c.10097.10097.4	573	608	35	2891.41	723.861	4	-1	0.24	0.78	16.44
DFPPFPQKLK-FREPQREER-a8-b7	sp|P04517|POLG_TEV	sp|P04517|POLG_TEV	intra-protein xl	aleitner_D2005_137.c.05372.05372.4_aleitner_D2005_137.c.05372.05372.4	2134	2143	9	2443.27	611.826	4	-1.5	0.46	0.89	16.42
ISSETSGGEAKDEIIR-TGVDGLFEEPR-a11-b4	sp|P17629|HPR1_YEAST	sp|P17629|HPR1_YEAST	intra-protein xl	aleitner_D2005_135.c.09630.09630.4_aleitner_D2005_135.c.09630.09630.4	573	604	31	2891.41	723.86	4	-1.6	0.28	0.72	16.38
INSASQTEGDELKSEQTQPK-GEISEENTK-a13-b2	sp|P17629|HPR1_YEAST	sp|P17629|HPR1_YEAST	intra-protein xl	aleitner_D2005_137.c.02810.02810.3_aleitner_D2005_137.c.02810.02810.3	683	692	9	3176.49	1059.84	3	-1.4	0.28	0.72	16.02

## Sheet: Legend
Description of the column headers
Id	Assigned peptides and cross-linking sites within the peptide sequences. The longer peptide is designated as (a)lpha, the shorter as (b)eta.
Protein1	SwissProt/UniProt accession number and identifier of the protein 1 (containing peptide desginated as alpha).
Protein2	SwissProt/UniProt accession number and identifier of the protein 2 (containing peptide desginated as beta).
XLType	Intra- or inter-protein, sometimes also ambiguous.
Spectrum	References the actual MS/MS spectra that were used for the assignment.
AbsPos1	Position in the protein sequence of protein 1.
AbsPos2	Position in the protein sequence of protein 2.
deltaAA	Distance in the primary sequence (makes only sense for intra-proteins cross-links).
Mr	Molecular mass calculated from experimental m/z and z (neutral mass).
Mz	Experimentally observed mass-to-charge ratio of the precursor ion in Da.
z	Experimentally observed precursor charge.
Error [ppm]	Deviation between experimental and theoretical mass in ppm.
TIC	Fraction of the total ion current covered by assigned fragment ions.
delta score	Relative score for the top hit in relation to the second best hit for this spectrum, calculated as Id-score of 2nd best hit divided by Id-score of best hit. "0" means no second best hit exists.
Id-score	Identification score as assigned by xQuest. The higher, the better.
X	in the amino acid sequence denotes an oxidized Met residue
